# Supplementary material for: Androgen aggravates aortic aneurysms via suppression of PD-1 in mice
Source: JCI journal article supplement (doi:10.1172/jci169085), 2024-06-20
Supplement: sd1 [file 1]

301 Moved Permanently

# Moved Permanently

The document has moved here.
