# Supplementary material for: Androgen aggravates aortic aneurysms via suppression of PD-1 in mice
Source: JCI journal article supplement (doi:10.1172/jci169085), 2024-06-20
Supplement: sd1 [file 1]

# Supplementary Material

## Androgen aggravates aortic aneurysms via suppressing PD-1 in mice

Xufang Mu<sup>1</sup>, Shu Liu<sup>2</sup>, Zhuoran Wang<sup>1</sup>, Kai Jiang<sup>2</sup>, Tim McClintock<sup>2</sup>, Arnold J. Stromberg<sup>3, †</sup>,  
Alejandro V. Tezanos<sup>3</sup>, Eugene S Lee<sup>4</sup>, John A. Curci<sup>5</sup>, Ming C Gong<sup>2,6,\*</sup>, and Zhenheng Guo<sup>1,6,7,\*</sup>

<sup>1</sup>Departments of Pharmacology and Nutritional Sciences, <sup>2</sup>Physiology, <sup>3</sup>Statistics, and <sup>6</sup>Saha  
Cardiovascular Research Center, University of Kentucky, Lexington, KY; <sup>4</sup>Department of  
Research, Sacramento VA Medical Center, Mather, CA; <sup>5</sup>Department of Vascular Surgery,  
Vanderbilt University, Nashville, TN; <sup>7</sup>Department of Research, Lexington Veterans Affairs  
Medical Center, Lexington, KY, USA

The authors have declared that no conflict of interest exists

<sup>†</sup>Deceased September 17, 2023

### **\*To whom correspondence should be addressed:**

Ming C. Gong, Ph.D.

Zhenheng Guo, Ph.D.

Email: [ming.gong@uky.edu](mailto:ming.gong@uky.edu)

email: [zguo2@uky.edu](mailto:zguo2@uky.edu)

### **This PDF file includes**

Supplementary text (Material and Methods)

Supplemental Figures 1 to 30

Supplemental Tables 1 to 8

Supplemental References

## Material and Methods

### Animals

C57BL/6J male and female mice aged 9-10 months were purchased from the National Institute on Aging (Charles River) or generated by in-house breeding. Global PD-1 knockout mice (strain #: 028276) and WT C57BL/6J mice (Strain #:000664) were purchased from the Jackson Laboratory. PD-1 knockout mice have been bred with C57BL/6J mice for at least 15 generations. All mice were housed in the facilities of the Division of Laboratory Animal Resources at the University of Kentucky. Mice were fed a chow diet with free access to drinking water ad libitum. The sex and age of mice in the current study were explicitly specified in the result and figure legend.

### Administration of mice with aldosterone and high salt (Aldo-salt) to induce aortic aneurysms

Aortic aneurysms were induced by subcutaneous implantation of osmotic minipumps (Alzet model 2004; 28-day release; DURECT) containing aldosterone (Aldo; 200  $\mu\text{g}/\text{kg}/\text{day}$  in 50% DMSO) into C57BL/6J mice with free access to a high salt drinking water (0.9% NaCl and 0.2% KCl) for four or eight weeks as described (1-3).

### *In vivo* aortic ultrasound imaging

The maximal intraluminal diameters of suprarenal abdominal aortas and aortic arches were measured by a high-resolution ultrasound imaging system (Vevo 2100 and Vevo 3100, VisualSonics) in mice one week before (to set up a baseline) and weekly four or eight weeks after Aldo-salt or high-fat diet (HFD) and angiotensin II (Ang II) administration. The procedures for measuring the maximal intraluminal diameters of the suprarenal aortas by ultrasound were described previously (1-3). The procedures for measuring the maximal intraluminal diameters of the aortic root and arch by ultrasound were adapted from Sawada et al. (4). The growth rate of the suprarenal aortic diameters in response to Aldo-salt was calculated from the ultrasound data: growth rate (mm/week) = (the internal

51 diameters of the suprarenal aorta four weeks after Aldo-salt administration - baseline of the  
52 suprarenal aorta) / 4 week.

### 54 **Blood pressure measurement**

55 Mouse blood pressures were measured by a non-invasive tail-cuff method (Coda 8; Kent Scientific)  
56 one week before (to set up a baseline) and three or seven weeks after Aldo-salt or HFD and Ang II  
57 administration, as described previously (1-3).

### 59 ***Ex vivo* morphometric analysis of the aorta**

60 The aortas were isolated from mice four or eight weeks after Aldo-salt or HFD and Ang II  
61 administration. After dissection to remove fat tissues, the aortas were photographed by the Nikon  
62 SMZ2800 stereo microscope with a digital camera. The maximal diameters of the ascending aortas,  
63 aortic arch, descending aortas, and suprarenal abdominal aortas were analyzed by Nikon NIS-  
64 Element software as described previously (1-3).

### 66 **Definition, classification, and quantification of aortic aneurysms**

67 Aldo-salt- or HFD and Ang II-induced AAA and TAA were defined as having at least a 50% increase  
68 in the maximal internal (intraluminal) or external diameters in mice administered Aldo-salt compared  
69 with the same region of the aorta in control mice or the appearance of evident aortopathy as  
70 described previously (1-3). Aldo-salt-induced aortic aneurysms were classified as Type I (the gross  
71 appearance of aortic dilation), Type II (at least a 2-time increase in external diameter of the aorta),  
72 Type III (a pronounced bulbous form of Type II with a thrombus), and Type IV (aortic rupture) as  
73 adapted from Daugherty et al. (5) and described in Supplemental Figure 3. Aldo-salt- or HFD and Ang  
74 II-induced aortic aneurysms were quantified as the percentage of the incidence of total aortic  
75 aneurysms, including abdominal aortic aneurysms (AAA), thoracic aortic aneurysms (TAA), and aortic  
76 aneurysm rupture, as described previously (1-3).

77

## 78 **Orchiectomy**

79 The procedures for orchiectomy and sham operation were adapted from Henriques et al. (6). Briefly,  
80 orchiectomy was performed on mice two weeks before Aldo-salt administration. After anesthetization  
81 with 2-3% isoflurane, a single midline incision was made at the caudal abdominal aorta. The skin was  
82 separated from the muscle layer, and a similar longitudinal incision was made through the muscle.  
83 Both testes can be reached through the same incision. A knot was tied under the testes to reduce  
84 bleeding. After the testes and epididymis were excised with scissors, the cut end was cauterized and  
85 put back under the muscle. The incision was closed in two layers with a suture. Sham operations  
86 were subject to a similar surgical procedure without removing testes.

87

## 88 **Blood testosterone measurement**

89 Blood was collected by cardiac puncture from orchiectomized and sham-operated mice administered  
90 Aldo-salt for four weeks or male mice with and without 10-day Aldo-salt administration. The collected  
91 blood was processed into serum or plasma as described previously (1-3). Serum or plasma  
92 testosterone levels were measured by a testosterone ELISA kit (Enzo Life Sciences) according to the  
93 manufacturer's instructions.

94

## 95 **Urinary and serum sodium measurement and salt retention analysis**

96 Mice were individually housed in metabolic cages (Tecniplast) to measure 24-h food and water intake  
97 and collect 24-h urine samples one week before (to set up a baseline) and three weeks after Aldo-salt  
98 administration. Serum was collected four weeks after Aldo-salt administration. The urinary and serum  
99 sodium concentrations [Na] were measured by a dual-channel flame photometer (Cole-Parmer)  
100 according to the manufacturer's instructions. The 24-h sodium retention was calculated as described  
101 by Lee et al. (7) as 24-h sodium intake – 24-h urinary sodium excretion, where 24-h sodium intake =

(24 h food weight x food [Na]) + (24 h drinking water x drinking water [Na]), and 24-h urinary sodium excretion = 24 h urine volume x urine [Na].

### **Dihydrotestosterone (DHT) pellet administration to orchietomized mice**

DHT pellets (10 mg, 60-day release) were purchased from Innovative Research of America. Mice were orchietomized for two weeks (to deprive gonadal androgen) and then administered with Aldo-salt (to induce aortic aneurysms) with or without subcutaneous DHT pellet implantation (to restore androgen) for four weeks. The procedures for administering DHT pellets to orchietomized mice were adapted from Henriques et al. (8).

### **Treatment of mice with ASC-J9**

ASC-J9, an AR degradation enhancer (9), was purchased from Advanced ChemBlocks. ASC-J9 was dissolved in DMSO (25 mg/120  $\mu$ l DMSO) and mixed completely until it had a clear yellow color. The mixed solution was then diluted in a pre-warmed (55°C) sesame oil (Millipore Sigma) to 1,200  $\mu$ l, mixed completely, and then immediately injected into mice (50 mg ASC-J9/kg mouse BW, i.p.; to induce AR degradation), and once a day with Aldo-salt (to induce aortic aneurysms) for four weeks. The procedures for administering ASC-J9 to mice were adapted from Huang et al. (10).

### **Immunocytochemistry (IHC)**

The aorta, spleen, and lymph nodes were isolated from mice ten days, four weeks, and eight weeks after Aldo-salt or HFD and Ang II administration, as indicated in the manuscript and figure legend, respectively. The human aortas with and without aortic aneurysms were obtained from Drs. Eugene Lee (Sacramento Veterans Affairs Medical Center) and John Curci (Vanderbilt University). All tissues were embedded in paraffin and then cut into 5- $\mu$ m thickness sections.

Aortic elastin breaks were detected by Verhoeff-Van Gieson staining in longitudinal sections of the

128 thoracic aortas and cross-sections of the abdominal aorta with an Elastic Stain Kit (Fisher Scientific)  
129 according to the manufacturer's instructions. Aortic elastin breaks were quantified by the manual  
130 count of elastin breaks under a microscope and expressed as total elastin breaks/section/mice as  
131 described previously(2, 3, 11).

132  
133 The aorta, spleen, and lymph node sections were incubated with various primary antibodies (Ab) for  
134 immunostaining detection of various protein expressions. The information on the primary antibodies  
135 used in the immunohistological staining was described in Supplemental Table 7. Pilot studies with  
136 different Ab dilutions were conducted for all primary Ab to obtain their optimal concentrations for  
137 immunostaining. The specificity of all antibodies was verified using tissue sections from knockout  
138 mice, if available, or a nonspecific IgG (Gong and Guo, unpublished observations). The procedure for  
139 histological and immunohistological staining was described previously (2, 3, 11). Immunostaining was  
140 quantified by ImageJ (<https://imagej.nih.gov/ij/>) and expressed as an average percentage of area  
141 fractions from three to five random images per section per mouse as described (12).

### 143 **Treatment of mice with flutamide**

144 Flutamide, a selective antagonist of AR (13), was purchased from Millipore Sigma. Flutamide was  
145 dissolved in ethanol and then diluted with corn oil (Millipore Sigma) to 10% (v/v). Mice were  
146 administered Aldo-salt (to induce aortic aneurysms) with flutamide (50 mg/kg; to inhibit AR) or vehicle  
147 (10% ethanol in corn oil) via intraperitoneal injection once a day for four weeks. The procedures for  
148 i.p. flutamide injection to mice were adapted from Davis et al. (13).

### 150 **Quantitative analysis of mRNA expression**

151 The procedures for RNA purification, reverse transcription, and real-time PCR were described  
152 previously (14-19). The sequence of the real-time PCR primers was described in Supplemental Table  
153 8. All PCR primers were designed to cross introns of chromosomes to eliminate potential genomic

154 DNA contamination and verified by dissociation curve analysis to ensure the specificity of the PCR  
155 primers. All mRNA expressions were normalized to the housekeeping gene 36B4 (also known as  
156 Rplp0) and quantified by a delta-delta Ct method as described previously (14-19).

### 158 **RNA sequence (RNA-seq) and bioinformatics analysis**

159 The whole aortas were isolated from three groups of mice (5 mice/group): 1) administered Aldo-salt  
160 for one week; 2) orchiectomy followed by one-week Aldo-salt administration; 3) orchiectomy followed  
161 by one-week Aldo-salt with DHT pellet administration. After storage and dissection in RNAlater  
162 solution (FisherScientific), total RNA was purified using an RNeasy mini-kit (Qiagen) and then sent to  
163 the Genomics Core Laboratory at the University of Kentucky to measure the integrity and purity of  
164 purified RNA by Agilent Bioanalyzer 2100 using an RNA nano Chip kit (Agilent Technologies).

165 Purified total RNA samples with RNA integrity number (RIN) > 9 were sent to Novogene for Illumina  
166 RNA-seq with a sequencing depth of 20 million reads per sample.

167  
168 RNA-Seq data in the form of compressed Fastq files from Novogene were uploaded to the Illumina  
169 BaseSpace Sequencing Hub (Illumina) and were aligned to the mouse genome (build mm10) using  
170 the STAR Aligner v2.5.2a. After alignment, differentially abundant mRNAs were identified using  
171 DESeq2 (20). The mRNAs with  $p < 0.01$  were considered differentially abundant. Log<sub>2</sub> (fold change)  
172 and  $-\log_{10}$  ( $p$ -value) were used for the visualization of differences in transcript abundance in the form  
173 of volcano plots using Prism 9 (GraphPad). Venn diagrams and heatmaps were generated by  
174 TBtools, a Toolkit for Biologists (21). The 180 mRNAs upregulated by orchiectomy but downregulated  
175 by DHT and 150 mRNAs downregulated by orchiectomy but upregulated by DHT were subjected to  
176 comprehensive pathway enrichment analyses via Enrichr using the Bioplanet 2019 database  
177 (<https://maayanlab.cloud/Enrichr/>) (22). The pathways with adjusted  $p < 0.01$  (Benjamini-Hochberg  
178 method) were considered significant.

## Flow cytometry analysis of immune cells

The procedures for flow cytometry analysis of immune cells in the mouse aorta, spleen, lymph node, and blood were adapted from Galkina et al. (23) and Melak et al. (24). The whole aorta was isolated from mice perfused with PBS containing 2% heparin. Isolated aortas were dissected to remove fatty tissue while keeping the adventitia intact. The aortas were cut into small pieces and then incubated with 450 U/mL collagenase type I, 125 U/mL collagenase type XI, 60 U/mL hyaluronidase type I-s, and 60 U/mL DNase-I in DMEM media at 37 °C for 1 hour with gentle shaking and vortex or for 15 minutes followed by the dissociation with gentleMACS Dissociator (Miltenyi Biotec) using the presetting program (heart program) with repeating the procedure three times to process the aorta into single cell suspension. All enzymes except collagenase type I (Worthington Biochemicals) were obtained from Millipore Sigma.

The spleen, peri-aortic lymph node, and blood were harvested from mice perfused with PBS containing 2% heparin. A small piece of the spleen was cut to prepare splenic cell suspension. The small pieces of the spleen and the whole spleen were weighed to calculate the total immune cells in the spleen. The bilateral lymph nodes at the bifurcation of the aorta were collected for flow cytometry. A single cell suspension was obtained by using syringe plunges to mash the small piece of the spleen, digested aortas, and pooled lymph nodes through a 70- $\mu$ m strainer (Fisher Scientific). Blood and splenic cells were incubated with an RBC lysis buffer (eBioscience) to remove erythrocytes.

Single-cell suspensions were first incubated with an anti-mouse CD16/32 Ab (Biolegend) to block the nonspecific binding of the immunoglobulin to Fc receptors and then stained with various primary Ab conjugated with different fluorescence (Supplemental Table 7) for thirty minutes in the dark. After washing, cells were fixed by a stabilizing fixative solution (BD Biosciences) and mixed with Precision Count Beads (Biolegend) to obtain absolute counts of cells by flow cytometry. Immunofluorescence was detected by flow cytometry (BD Symphony 2.0 and Full spectral Aurora Cytek) in the University



of Kentucky Flow Cytometry and Immune Monitoring Core Facility. Cells from the spleen, lymph nodes, and blood were also stained with all the fluorophores minus one of them (FMO) to identify gating boundaries and ensure the specificity of antibodies. Data were analyzed using FlowJo™ v10.

### **Western blot**

The procedures for using the trichloroacetic acid (TCA) method to prepare protein samples from the spleen and peri-aortic lymph nodes for Western blot analysis were described previously (16-18). The information on anti-mouse PD-1, CD3ε, CD19, and GAPDH were described in Supplemental Table 7. Western blots were quantified by ImageJ as described (16-18).

### **AR ChIP assay**

A splenic cell suspension was prepared by mashing one freshly isolated mouse spleen through a 70-μm strainer for the AR ChIP assay. Approximately  $4 \times 10^6$  splenic cells were used for one ChIP assay. SimpleChIP® Enzymatic Chromatin IP Kit (Cell Signaling) was used for the AR ChIP assay. Two ChIP-grade anti-mouse AR antibodies with different epitopes (Supplemental Table 7) were used in the AR ChIP assay to pull down chromatin containing the PD-1 promoter. A normal rabbit IgG (Cell Signaling) was included in the AR ChIP assay as a negative control to ensure the specificity of AR immunoprecipitation. Two sets of ChIP-PCR primers were designed to amplify androgen-response element (ARE)4-5 and ARE 6 in the mouse PD-1 promoter (Figure 9J), respectively. The sequences of ChIP PCR primers were described in Supplemental Figure 8. The binding of AR to the mouse PD-1 promoter was quantified by ImageJ and expressed as the percentage of genomic DNA input as described (18, 19).

### **AR promoter assay**

A 488-bp mouse PD-1 promoter (-4,444 to -3,956 bp relative to TSS) containing putative ARE6-10 (Figure 7J) was synthesized by Integrated DNA Technology (IDT) and then subcloned into the pGL3-

232 basic firefly luciferase reporter vectors (Promega) in Kpn I and Hind III restriction enzyme sites. The  
233 pGL3-basic-PD-1 promoter construct (0.75  $\mu$ g) was co-transfected with a pcDNA Flag-M4-human AR  
234 construct (3  $\mu$ g), provided by Dr. Steven Balk (Addgene plasmid # 171240) (25), with 1:4 molecular  
235 ratio of PD-1 promoter to AR, into AD-HEK 293 cells (Stratagene) by LipoFexin (Lamda Biotech)  
236 according to the manufacturer's instructions. A pcDNA3.1 vector (Invitrogen; 2.25  $\mu$ g) was added to  
237 the cells with the pGL3-basic vector or the PD-1 promoter only to maintain the same ratio of DNA to  
238 LipoFexin. A Renilla luciferase control reporter vector (pRL-TK control vector; 10 ng; Promega) was  
239 included in all samples to control transfection efficiency. After 4-hour transfection, the cell culture  
240 medium was changed to a DMEM supplemented with 10% charcoal dextran-stripped fetal bovine  
241 serum (VWR) to minimize potential endogenous hormone effects. DHT (100 nM) was added into the  
242 cells with the pcDNA Flag-M4-AR construct to activate AR after 24-h transfection. Cells were  
243 harvested after 48-h transfection. The PD-1 promoter activity was analyzed by a modified dual  
244 luciferase enzyme assay as described previously (17-19).

### 245

### 246 **Treatment of orchietomized mice with anti-PD-1 antibody**

247 The rat monoclonal anti-mouse PD-1 antibody (clone 29F.1A12) and rat IgG2a isotype control  
248 antibody (clone 1-1) were purchased from Leinco Technologies. Mice were subjected to orchietomy  
249 for two weeks and then administered Aldo-salt with the anti-PD1 or control Ab (200  $\mu$ g/mice; i.p.;  
250 twice a week) for eight weeks. The procedures for administering anti-mouse PD-1 antibodies to mice  
251 were adapted from Koga et al. (26).

### 252

### 253 **Adoptive T cell transfer**

254 PD-1 KO and WT T cells were isolated from the spleens of 4-month-old male PD-1 KO and WT  
255 C57BL6J donor mice. Following the manufacturer's protocol, the spleens were dissociated into single  
256 splenic cell suspensions using the gentleMACS™ Dissociator (Miltenyi Biotec). T cells were isolated  
257 by MicroBeads conjugated to monoclonal anti-mouse CD90.2 Ab (Miltenyi Biotec) according to the

258 manufacturer's protocol. The freshly isolated T cells were adoptively transferred into 9-10-month-old  
259 orchietomized C57BL/6J recipient mice via retro-orbital sinus injection ( $10^7$  T cells/100 $\mu$ l/mouse) two  
260 days prior to and eight and eighteen days after Aldo-salt administration, as previously described (27).

### 261

### 262 **Administration of mice with HFD feeding and Ang II infusion to induce aortic aneurysms**

263 Two-month-old male global PD-1 knockout and WT mice were fed a high-fat diet (D12492, 60% kcal  
264 from fat; Research Diets) for two months to induce obesity. After one month of HFD feeding, the mice  
265 were infused with Ang II (1000 ng/kg/min) by osmotic minipumps (Alzet 2004) via subcutaneous  
266 implantation for 28 days to induce aortic aneurysms as previously described (28). The information on  
267 PCR primers for genotyping PD-1 knockout and WT mice was described in Supplemental Table 8.

### 268

### 269 **IL-6 measurement**

270 Serum was collected by cardiac puncture, and splenic lysates were prepared using the TCA method  
271 from PD-1 KO and WT mice four weeks after HFD and Ang II administration. The serum and splenic  
272 IL-6 levels were measured by a mouse IL-6 ELISA kit (Biolegend) following the manufacturer's  
273 protocol.

### 274

### 275 **Statistical analysis**

276 All data were expressed as mean  $\pm$  SEM. To compare one parameter between the two groups,  
277 normality tests were initially conducted. If the data passed the normality test, a parametric, unpaired,  
278 and two-tailed t-test was employed. If the data did not pass the normality test, a nonparametric,  
279 unpaired, and two-tailed test was used. For multiple comparisons of two parameters among multiple  
280 groups, a two-way ANOVA was performed with correction for multiple comparisons using controlling  
281 the false discovery rate. Similarly, for multiple comparisons of three parameters among multiple  
282 groups, a three-way ANOVA was used with correction for multiple comparisons by controlling the  
283 false discovery rate. The incidence of aortic aneurysms between the two groups was compared using

284 a two-sided Chi-Square test. The relationship between two quantitative variables was analyzed  
285 through simple linear regression. Significant outliers, identified by the outlier calculator (GraphPad),  
286 were excluded from the statistical analysis. All statistical analysis was carried out using Prism 9  
287 software (GraphPad). A *P*-value or adjusted *P*-value < 0.05 was considered significant unless  
288 specified somewhere. A *P*-value of > 0.05 was considered not significant (ns).

### 290 **Study approval**

291 All procedures to use mice for the current study were approved by the Institutional Animal Care and  
292 Use Committee of the University of Kentucky. All procedures to use human aortic aneurysm  
293 specimens for the current study were approved by the Institutional Review Board of the University of  
294 Kentucky.

## References

1. Liu S, Gong MC, and Guo Z. A New Mouse Model for Introduction of Aortic Aneurysm by Implantation of Deoxycorticosterone Acetate Pellets or Aldosterone Infusion in the Presence of High Salt. *Methods Mol Biol.* 2017;1614:155-63.
2. Liu S, Xie Z, Daugherty A, Cassis LA, Pearson KJ, Gong MC, et al. Mineralocorticoid receptor agonists induce mouse aortic aneurysm formation and rupture in the presence of high salt. *Arterioscler Thromb Vasc Biol.* 2013;33(7):1568-79.
3. Lutshumba J, Liu S, Zhong Y, Hou T, Daugherty A, Lu H, et al. Deletion of BMAL1 in Smooth Muscle Cells Protects Mice From Abdominal Aortic Aneurysms. *Arterioscler Thromb Vasc Biol.* 2018;38(5):1063-75.
4. Sawada H, Chen JZ, Wright BC, Moorleggen JJ, Lu HS, and Daugherty A. Ultrasound Imaging of the Thoracic and Abdominal Aorta in Mice to Determine Aneurysm Dimensions. *J Vis Exp.* 2019(145).
5. Daugherty A, Manning MW, and Cassis LA. Antagonism of AT2 receptors augments angiotensin II-induced abdominal aortic aneurysms and atherosclerosis. *Br J Pharmacol.* 2001;134(4):865-70.
6. Henriques TA, Huang J, D'Souza SS, Daugherty A, and Cassis LA. Orchidectomy, but not ovariectomy, regulates angiotensin II-induced vascular diseases in apolipoprotein E-deficient mice. *Endocrinology.* 2004;145(8):3866-72.
7. Lee DL, Sturgis LC, Labazi H, Osborne JB, Jr., Fleming C, Pollock JS, et al. Angiotensin II hypertension is attenuated in interleukin-6 knockout mice. *Am J Physiol Heart Circ Physiol.* 2006;290(3):H935-40.
8. Henriques T, Zhang X, Yiannikouris FB, Daugherty A, and Cassis LA. Androgen increases AT1a receptor expression in abdominal aortas to promote angiotensin II-induced AAAs in apolipoprotein E-deficient mice. *Arterioscler Thromb Vasc Biol.* 2008;28(7):1251-6.

- 331 9. Yang Z, Chang YJ, Yu IC, Yeh S, Wu CC, Miyamoto H, et al. ASC-J9 ameliorates spinal and  
332 bulbar muscular atrophy phenotype via degradation of androgen receptor. *Nature medicine*.  
333 2007;13(3):348-53.
- 334 10. Huang CK, Luo J, Lai KP, Wang R, Pang H, Chang E, et al. Androgen receptor promotes  
335 abdominal aortic aneurysm development via modulating inflammatory interleukin-1alpha and  
336 transforming growth factor-beta1 expression. *Hypertension*. 2015;66(4):881-91.
- 337 11. Liu S, Xie Z, Zhao Q, Pang H, Turk J, Calderon L, et al. Smooth muscle-specific expression of  
338 calcium-independent phospholipase A2beta (iPLA2beta) participates in the initiation and early  
339 progression of vascular inflammation and neointima formation. *J Biol Chem*.  
340 2012;287(29):24739-53.
- 341 12. Crowe AR, and Yue W. Semi-quantitative Determination of Protein Expression using  
342 Immunohistochemistry Staining and Analysis: An Integrated Protocol. *Bio Protoc*. 2019;9(24).
- 343 13. Davis JP, Salmon M, Pope NH, Lu G, Su G, Meher A, et al. Pharmacologic blockade and  
344 genetic deletion of androgen receptor attenuates aortic aneurysm formation. *J Vasc Surg*.  
345 2016;63(6):1602-12 e2.
- 346 14. Hou T, Su W, Duncan MJ, Olga VA, Guo Z, and Gong MC. Time-restricted feeding protects  
347 the blood pressure circadian rhythm in diabetic mice. *Proc Natl Acad Sci U S A*. 2021;118(25).
- 348 15. Su W, Xie Z, Guo Z, Duncan MJ, Lutshumba J, and Gong MC. Altered clock gene expression  
349 and vascular smooth muscle diurnal contractile variations in type 2 diabetic db/db mice. *Am J*  
350 *Physiol Heart Circ Physiol*. 2012;302(3):H621-33.
- 351 16. Xie Z, Gong MC, Su W, Turk J, and Guo Z. Group VIA phospholipase A2 (iPLA2beta)  
352 participates in angiotensin II-induced transcriptional up-regulation of regulator of G-protein  
353 signaling-2 in vascular smooth muscle cells. *J Biol Chem*. 2007;282(35):25278-89.
- 354 17. Xie Z, Liu D, Liu S, Calderon L, Zhao G, Turk J, et al. Identification of a cAMP-response  
355 element in the regulator of G-protein signaling-2 (RGS2) promoter as a key cis-regulatory

- 356 element for RGS2 transcriptional regulation by angiotensin II in cultured vascular smooth  
357 muscles. *J Biol Chem.* 2011;286(52):44646-58.
- 358 18. Xie Z, Su W, Liu S, Zhao G, Esser K, Schroder EA, et al. Smooth-muscle BMAL1 participates  
359 in blood pressure circadian rhythm regulation. *J Clin Invest.* 2015;125(1):324-36.
- 360 19. Zhao G, Zhong Y, Su W, Liu S, Song X, Hou T, et al. Transcriptional Suppression of CPI-17  
361 Gene Expression in Vascular Smooth Muscle Cells by Tumor Necrosis Factor, Kruppel-Like  
362 Factor 4, and Sp1 Is Associated with Lipopolysaccharide-Induced Vascular Hypocontractility,  
363 Hypotension, and Mortality. *Molecular and cellular biology.* 2019;39(11).
- 364 20. Love MI, Huber W, and Anders S. Moderated estimation of fold change and dispersion for  
365 RNA-seq data with DESeq2. *Genome Biol.* 2014;15(12):550.
- 366 21. Chen C, Chen H, Zhang Y, Thomas HR, Frank MH, He Y, et al. TBtools: An Integrative Toolkit  
367 Developed for Interactive Analyses of Big Biological Data. *Mol Plant.* 2020;13(8):1194-202.
- 368 22. Chen EY, Tan CM, Kou Y, Duan Q, Wang Z, Meirelles GV, et al. Enrichr: interactive and  
369 collaborative HTML5 gene list enrichment analysis tool. *BMC Bioinformatics.* 2013;14:128.
- 370 23. Galkina E, Kadl A, Sanders J, Varughese D, Sarembock IJ, and Ley K. Lymphocyte  
371 recruitment into the aortic wall before and during development of atherosclerosis is partially L-  
372 selectin dependent. *J Exp Med.* 2006;203(5):1273-82.
- 373 24. Mellak S, Ait-Oufella H, Esposito B, Loyer X, Poirier M, Tedder TF, et al. Angiotensin II  
374 mobilizes spleen monocytes to promote the development of abdominal aortic aneurysm in  
375 Apoe<sup>-/-</sup> mice. *Arterioscler Thromb Vasc Biol.* 2015;35(2):378-88.
- 376 25. Chen S, Gulla S, Cai C, and Balk SP. Androgen receptor serine 81 phosphorylation mediates  
377 chromatin binding and transcriptional activation. *J Biol Chem.* 2012;287(11):8571-83.
- 378 26. Koga N, Suzuki J, Kosuge H, Haraguchi G, Onai Y, Futamatsu H, et al. Blockade of the  
379 interaction between PD-1 and PD-L1 accelerates graft arterial disease in cardiac allografts.  
380 *Arterioscler Thromb Vasc Biol.* 2004;24(11):2057-62.

- 381 27. Yardeni T, Eckhaus M, Morris HD, Huizing M, and Hoogstraten-Miller S. Retro-orbital  
382 injections in mice. *Lab Anim (NY)*. 2011;40(5):155-60.
- 383 28. Police SB, Thatcher SE, Charnigo R, Daugherty A, and Cassis LA. Obesity promotes  
384 inflammation in periaortic adipose tissue and angiotensin II-induced abdominal aortic  
385 aneurysm formation. *Arterioscler Thromb Vasc Biol*. 2009;29(10):1458-64.

386



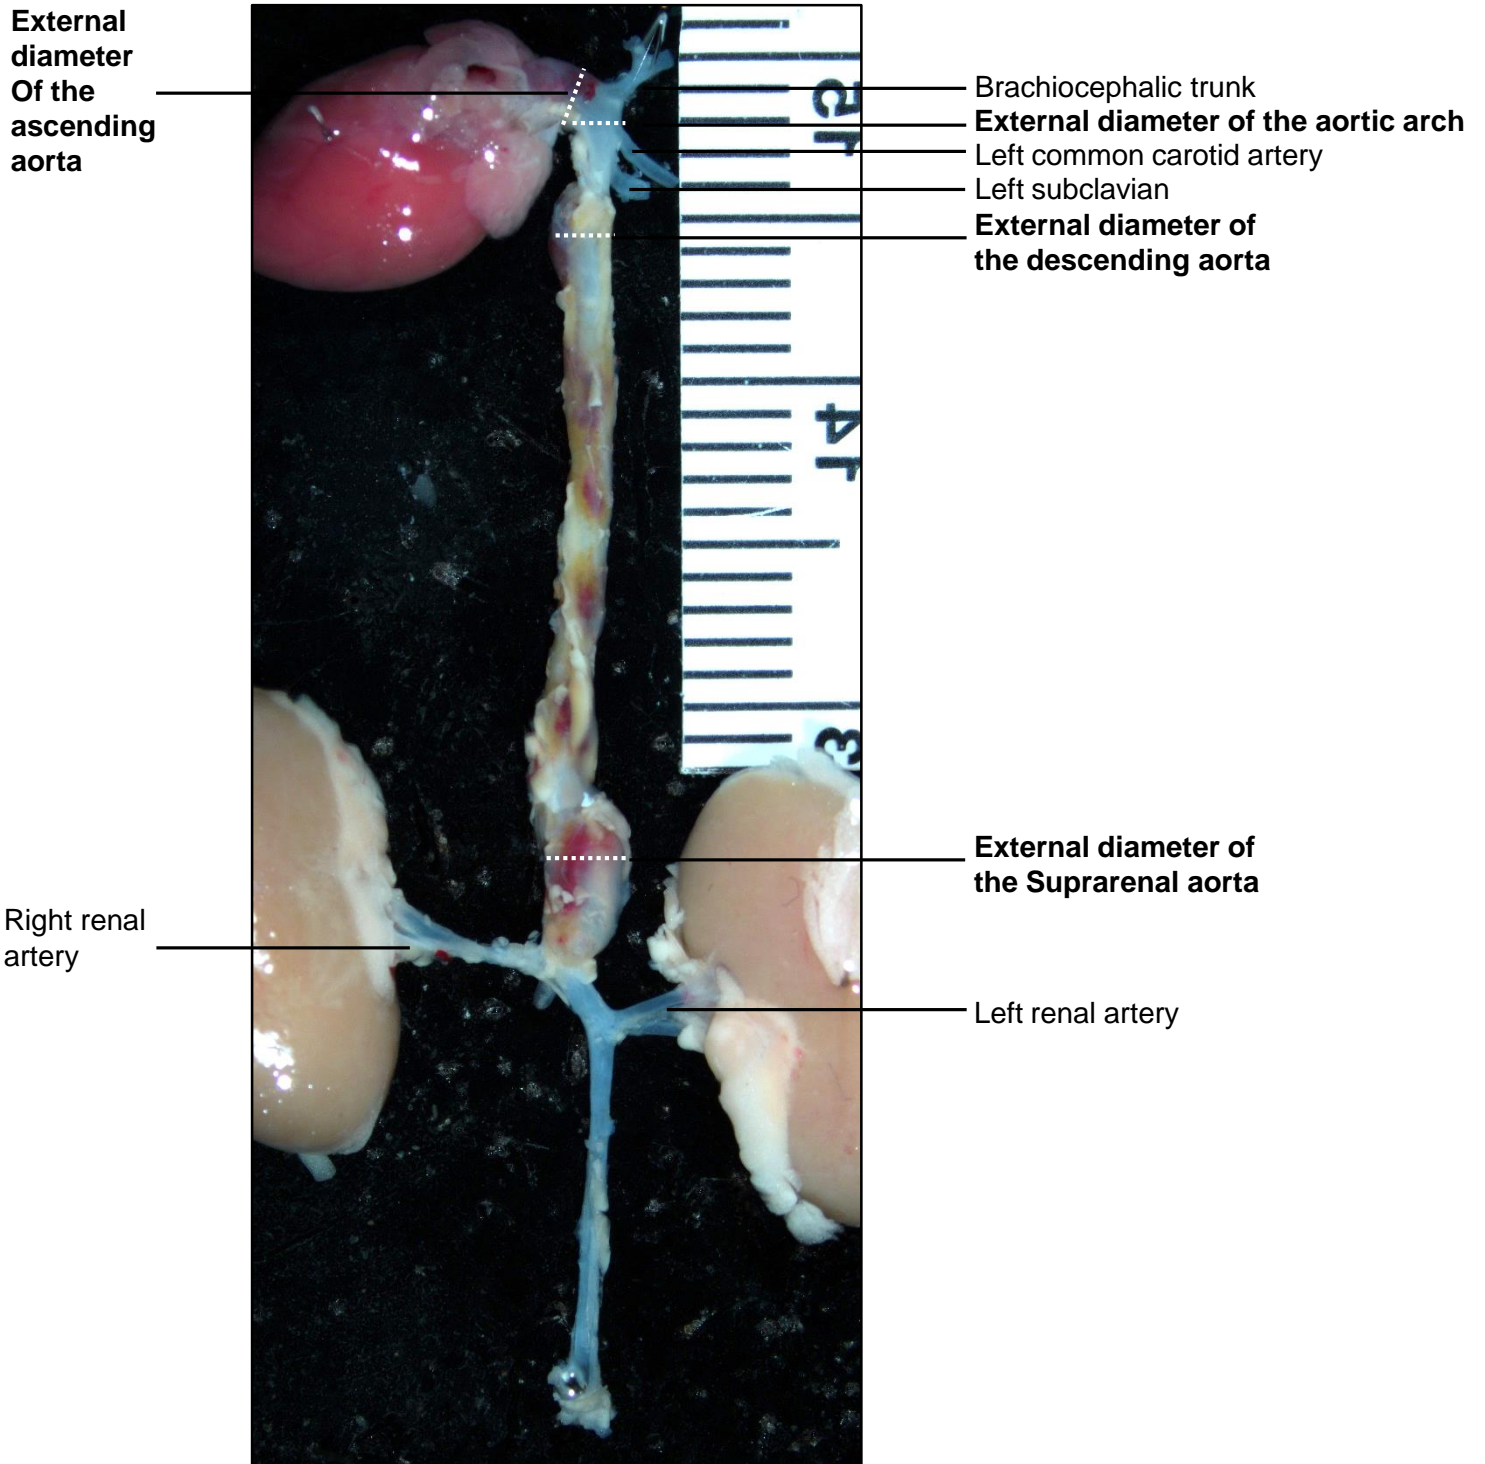

**Supplemental Figure 1. *Ex Vivo* measurement of maximal external diameters of the ascending aorta, aortic arch, descending aorta, and suprarenal aorta by microscopy.** The brachiocephalic trunk, left common carotid artery, left subclavian, right renal artery, and left renal artery are indicated. The dotted dash lines labeled in white show the maximal external diameters of the ascending aorta (AscAo), aortic arch (ArchAo), descending aorta (DesAo), and suprarenal aorta (SupAo), measured in the current study.

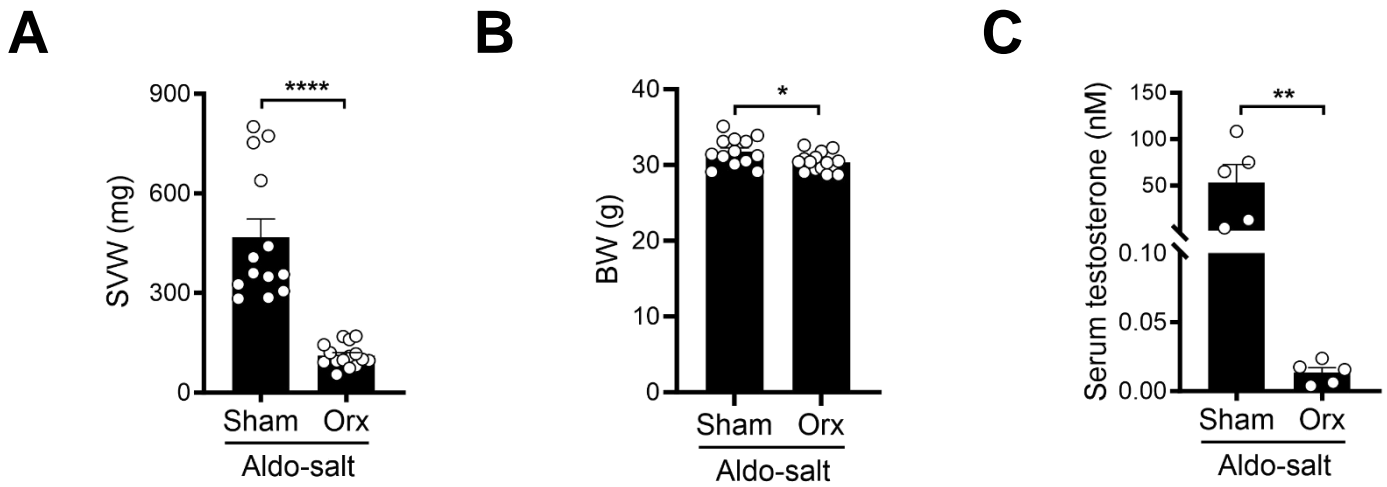

**Supplemental Figure 2. Gonadal androgen deprivation decreases seminal vesicle weight, body weight, and serum testosterone level in mice administered Aldo-salt.** The seminal vesicle weight (SVW; **A**;  $n = 13-15/\text{group}$ ), body weight (BW; **B**;  $n = 13-15/\text{group}$ ), and serum testosterone level (**C**;  $n = 5/\text{group}$ ) were measured in 10-month-old male C57BL/6J mice with orchiectomy (orx) or sham operation four weeks after Aldo-salt administration. The data were expressed as mean  $\pm$  SEM and analyzed by a two-tailed unpaired  $t$ -test. \*,  $P < 0.05$ ; \*\*,  $P < 0.01$ ; \*\*\*\*,  $P < 0.0001$ .

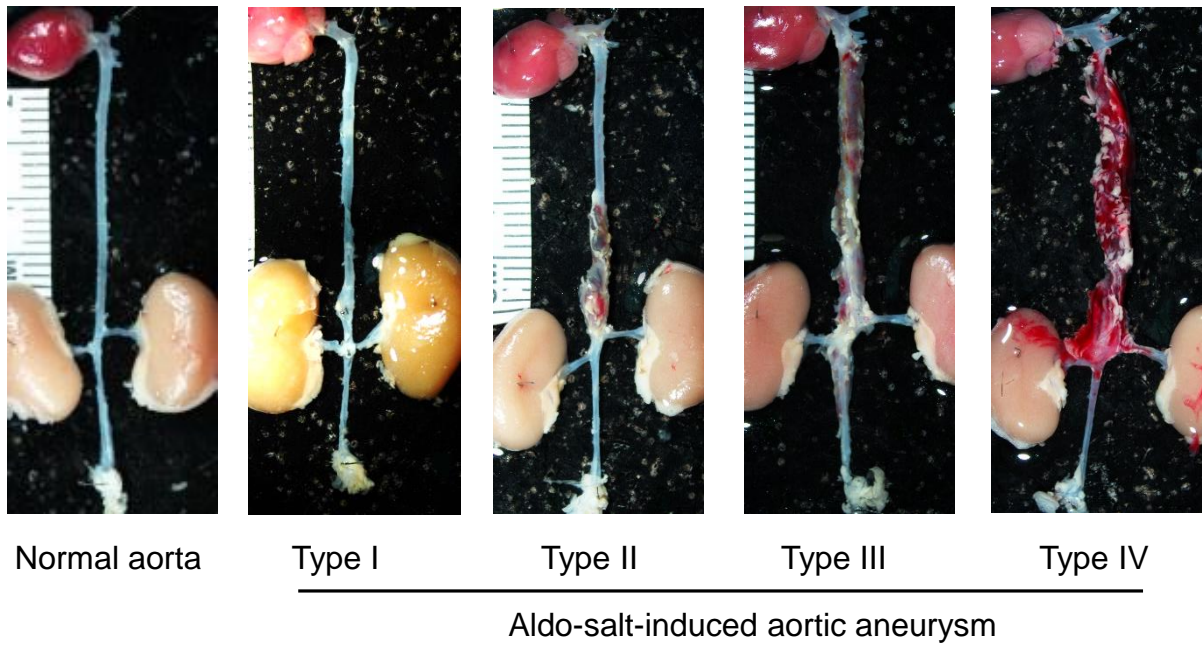

**Supplemental Figure 3. Classification of Aldo-salt-induced aortic aneurysms in 10-month-old or older C57BL/6J mice.** Aldo-salt-induced aortic aneurysms were classed as Type I (a gross appearance of the abdominal or thoracic aortic dilation compared with the normal aorta), Type II (at least two times the normal external diameter of the abdominal or thoracic aorta, frequently containing a thrombus), Type III (a pronounced bulbous form of type II that includes a thrombus in both the abdominal and thoracic aorta), and Type IV (aortic aneurysms with rupture).

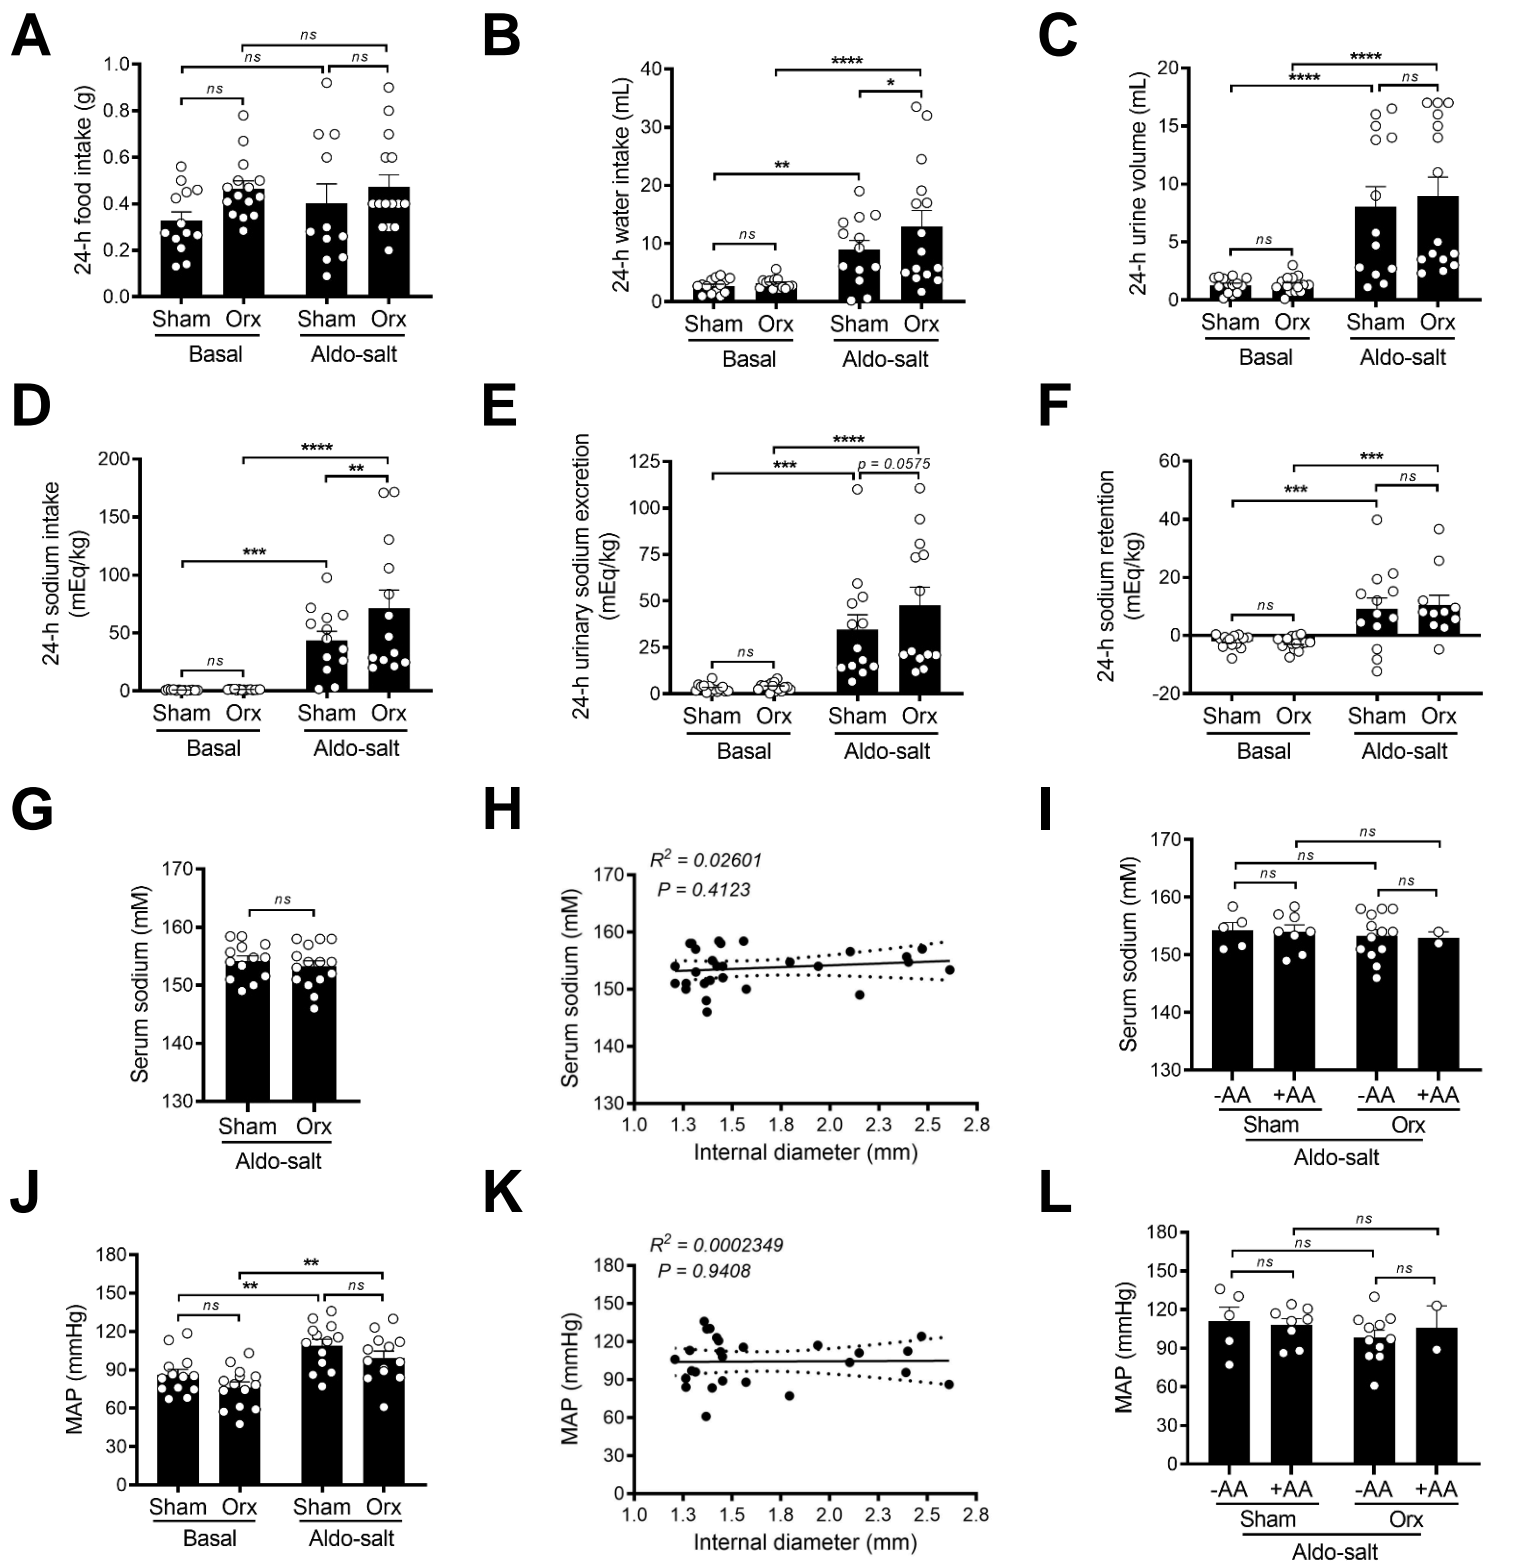

**Supplemental Figure 4. Gonadal androgen deprivation does not affect Aldo-salt-induced sodium retention and hypertension.** (A–F) 24-h food intake (A), water intake (B), urine volume (C), sodium intake (D), urinary sodium excretion (E), and sodium retention (F) were measured in 10-month-old male C57BL/6J mice with orx or sham operation one week before (basal) and three weeks after Aldo-salt administration ( $n = 13-15/\text{group}$ ). (G) Serum sodium levels of the mice with orx and sham-operation four weeks after Aldo-salt administration ( $n = 13-15/\text{group}$ ). (H) Correlation analysis of the internal diameter of the suprarenal aorta and serum sodium levels in the mice with orx and sham operation four weeks after Aldo-salt administration ( $n = 28/\text{group}$ ). (I) Serum sodium levels of the orchietomized and sham-operated mice with (+) and without (-) aortic aneurysms (AA) four weeks after Aldo-salt administration ( $n = 2-13/\text{group}$ ). (J) Mean arterial pressure (MAP) of the orchietomized and sham-operated mice one week before and three weeks after Aldo-salt administration ( $n = 13-15/\text{group}$ ). (K) Correlation analysis of the internal diameter of the suprarenal aorta and MAP in mice with orx or sham operation three weeks after Aldo-salt administration ( $n = 28/\text{group}$ ). (L) MAP of the orchietomized and sham-operated mice with (+) and without (-) AA ( $n = 2-13/\text{group}$ ). Data were expressed as mean  $\pm$  SEM and analyzed by two-way ANOVA with multiple comparison tests (A–F, I, J, and L), two-tailed unpaired *t*-test (G), and simple linear regression analysis (H and K). \*,  $P < 0.05$ ; \*\*,  $P < 0.01$ ; \*\*\*,  $P < 0.001$ ; \*\*\*\*,  $P < 0.0001$ ; *ns*, not significant.

**A**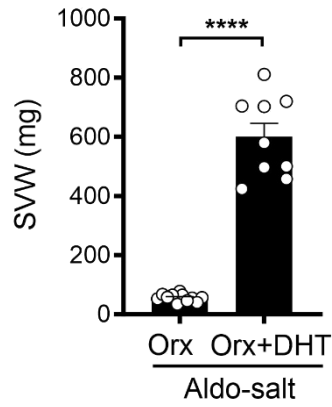**B**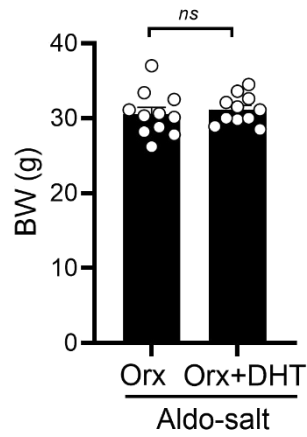

**Supplemental Figure 5. Effects of exogenous dihydrotestosterone (DHT) on seminal vesicle and body weight in orchietomized mice administered Aldo-salt.** The SVW (A) and BW (B) were measured in 10-month-old male C57BL/6J mice with orchietomy four weeks after Aldo-salt with and without dihydrotestosterone (DHT) pellet implantation ( $n = 9-11/\text{group}$ ). The data were expressed as mean  $\pm$  SEM and analyzed by a two-tailed unpaired  $t$ -test. \*\*\*\*,  $P < 0.0001$ .

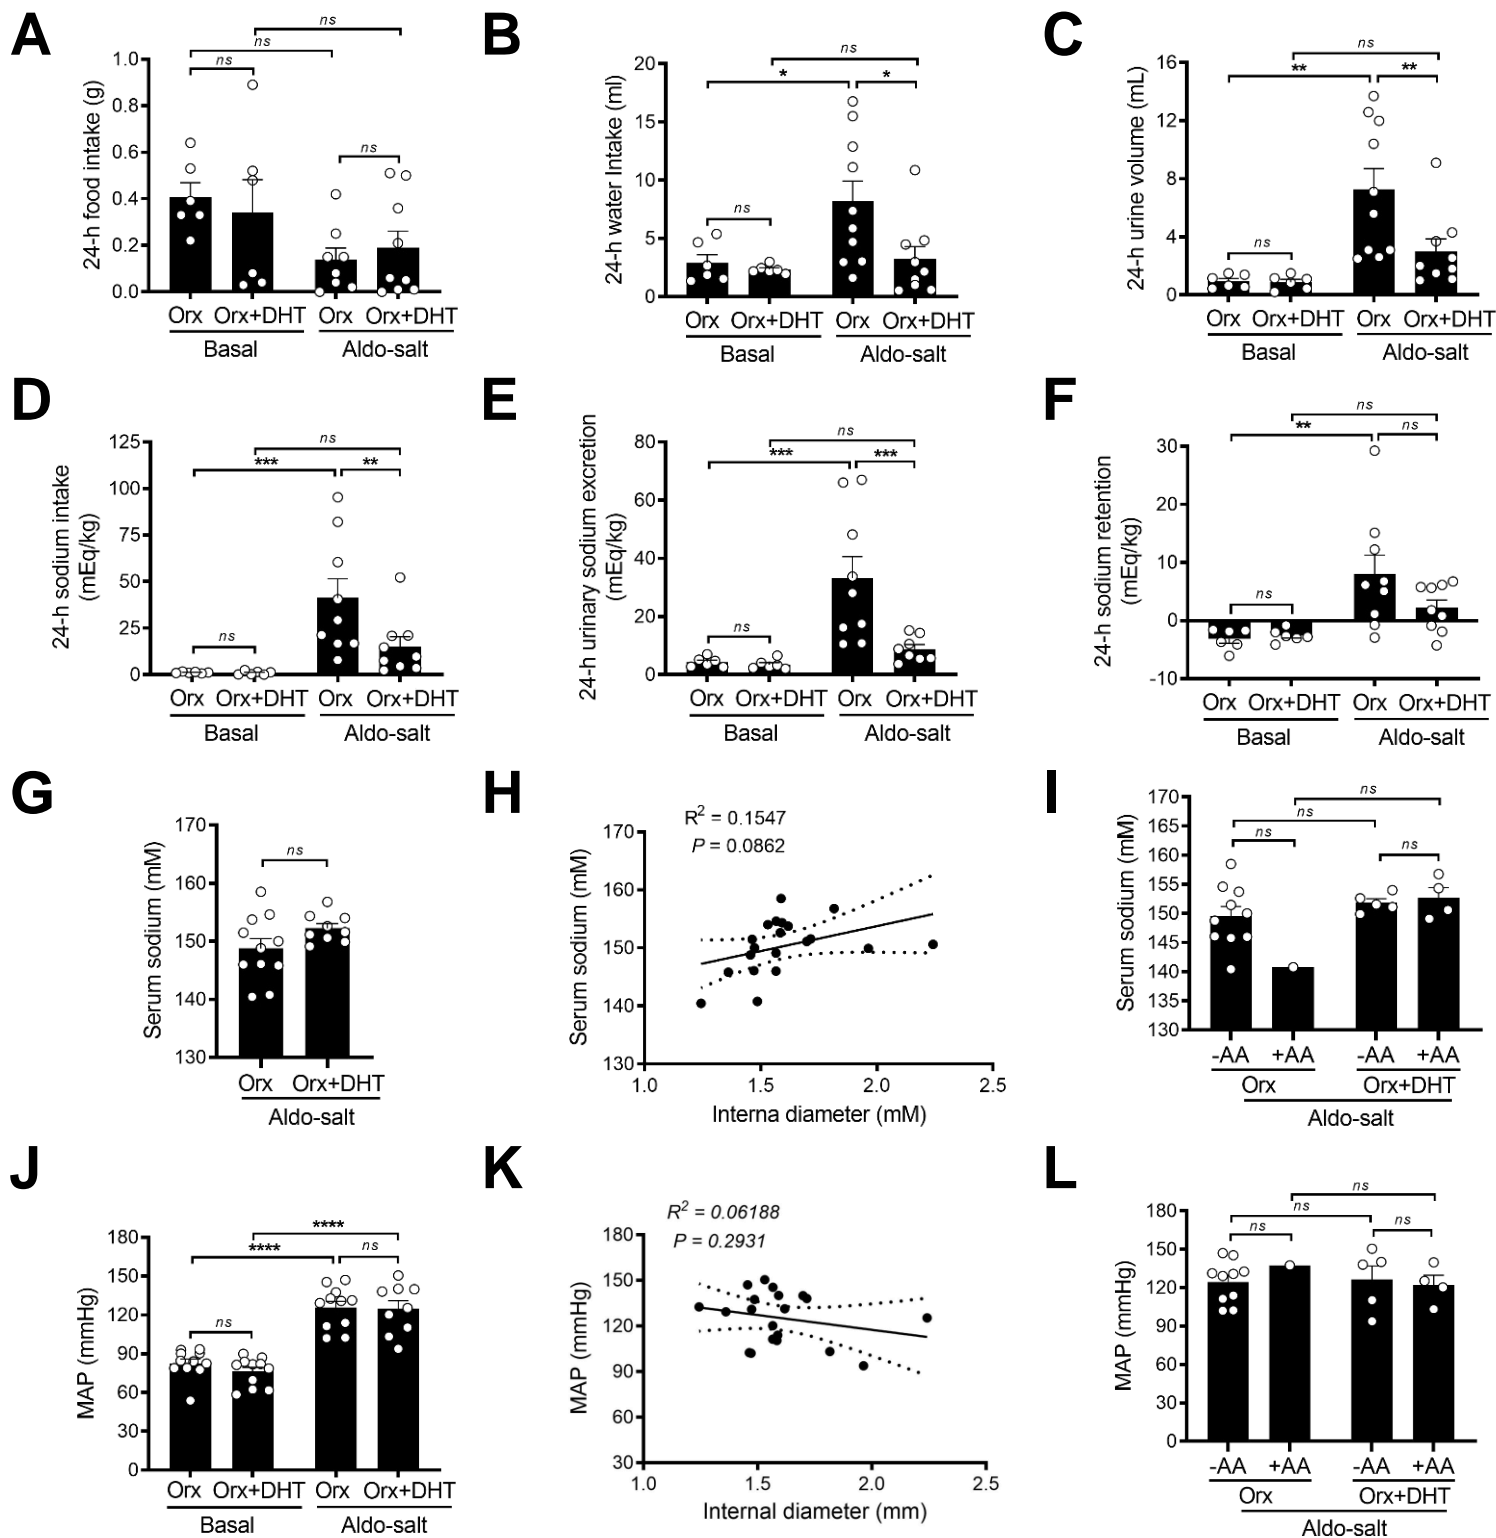

**Supplemental Figure 6. Exogenous DHT administration to orchietomized mice does not affect Aldo-salt-induced sodium retention and hypertension.** (A–F) 24-h food intake (A), water intake (B), urine volume (C), sodium intake (D), urinary sodium excretion (E), and sodium retention (F) were determined in 10-month-old male C57BL/6J mice with orchietomy one week before (basal) and three weeks after Aldo-salt with and without DHT pellet implantation ( $n = 6-9$ /group). (G) Serum sodium levels of the orchietomized mice four weeks after Aldo-salt with or without DHT administration ( $n = 9-11$ /group). (H) Correlation analysis of the internal diameter of the suprarenal aorta and serum sodium levels in the orchietomized mice four weeks after Aldo-salt with or without DHT administration ( $n = 20$ /group). (I) Serum sodium levels in orchietomized mice administered Aldo-salt with and without DHT administration and with (+) and without (-) AA ( $n = 1-10$ /group). (J) MAP of the orchietomized mice one week before and three weeks after Aldo-salt with and without DHT administration ( $n = 9-11$ /group). (K) Correlation analysis of the internal diameter of the suprarenal aorta and MAP in the orchietomized mice three weeks after Aldo-salt with and without DHT administration ( $n = 20$ /group). (L) MAP of the orchietomized mice with and without DHT and AA ( $n = 1-10$ /group). Data were expressed as mean  $\pm$  SEM and analyzed by two-way ANOVA for multiple comparison tests (A–F, I, J, and L), two-tailed unpaired  $t$ -test (G), and simple linear regression analysis (H and K). \*,  $P < 0.05$ ; \*\*,  $P < 0.01$ ; \*\*\*,  $P < 0.001$ ; \*\*\*\*,  $P < 0.0001$ ; ns, not significant.

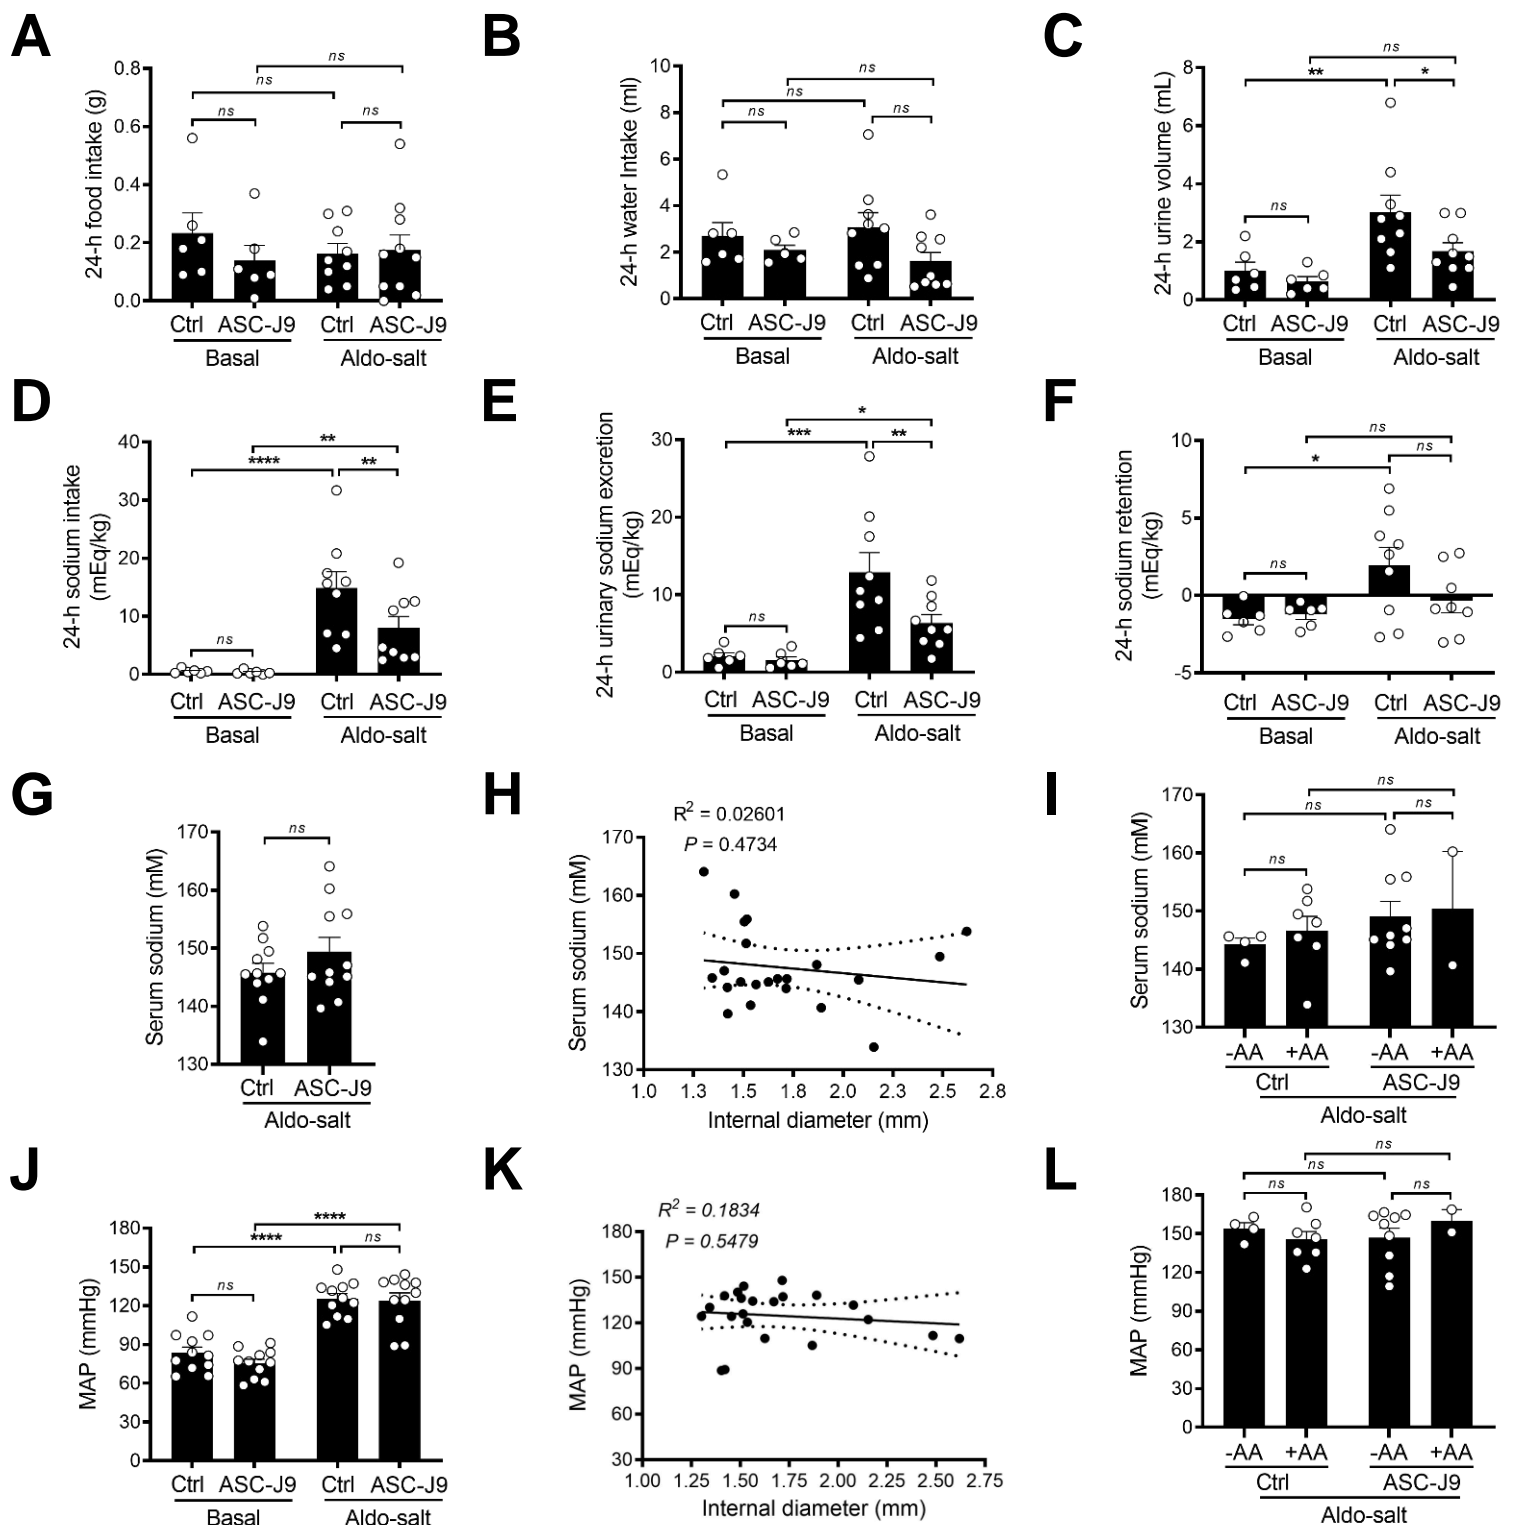

**Supplemental Figure 7. Downregulation of androgen receptors with ASC-J9 has little effect on Aldo-salt-induced sodium retention and hypertension.** (A–F) 24-h food intake (A), water intake (B), urine volume (C), sodium intake (D), urinary sodium excretion (E), and sodium retention (F) were determined in 10-month-old male C57BL/6J mice one week before (basal) and three weeks after Aldo-salt with (ASC-J9) and without (Ctrl) ASC-J9 administration ( $n = 6-10$ /group). (G) Serum sodium levels four weeks after Aldo-salt with and without ASC-J9 administration ( $n = 11$ /group). (H) Correlation analysis of the internal diameter of the suprarenal aorta and serum sodium levels in mice four weeks after Aldo-salt with and without ASC-J9 administration ( $n = 22$ /group). (I) Serum sodium levels of the mice administered Aldo-salt with and without ASC-J9 administration and with (+) and without (-) AA ( $n = 2-9$ /group). (J) MAP of the mice one week before and three weeks after Aldo-salt with and without ASC-J9 administration ( $n = 11$ /group). (K) Correlation analysis of the internal diameter of the suprarenal aorta and MAP in mice three weeks after Aldo-salt with and without ASC-J9 administration ( $n = 22$ /group). (L) MAP of the mice with (+) and without (-) AA ( $n = 2-9$ /group). Data were expressed as mean  $\pm$  SEM and analyzed by two-way ANOVA for multiple comparison tests (A–F, I, J, and L), two-tailed unpaired *t*-test (G), and simple linear regression analysis (H and K). \*,  $P < 0.05$ ; \*\*,  $P < 0.01$ ; \*\*\*,  $P < 0.001$ ; \*\*\*\*,  $P < 0.0001$ ; *ns*, not significant.

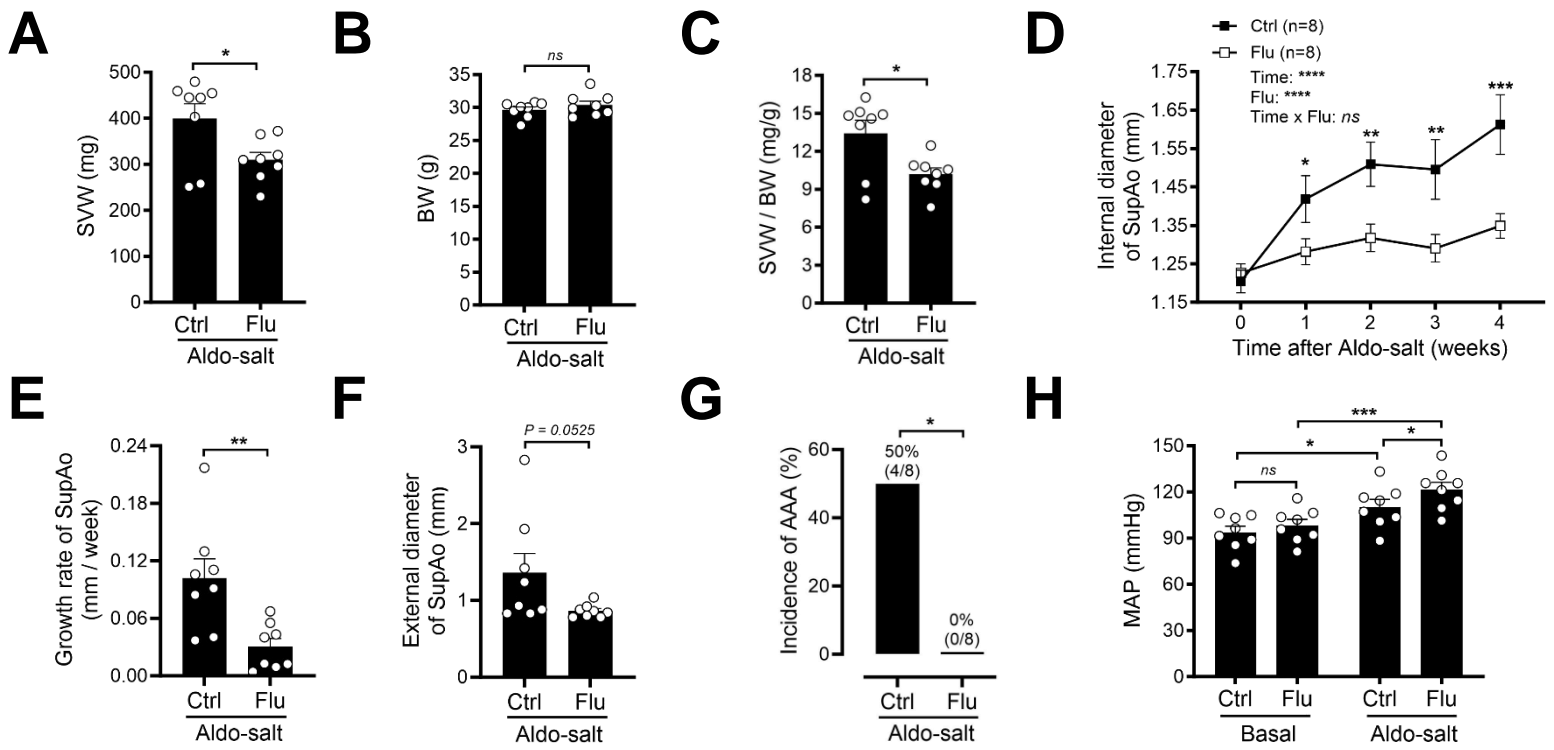

**Supplemental Figure 8. Antagonizing androgen receptors with flutamide inhibits Aldo-salt-induced abdominal aortic aneurysms.** (A–C) The SVW, BW, and SVW to BW ratio were measured in 9-10-month-old male C57BL/6J mice four weeks after Aldo-salt with androgen receptor antagonist flutamide (Flu) or vehicle (10% EtOH in corn oil; Ctrl) administration. Flutamide (50 mg/kg/day) and vehicle were delivered to mice via intraperitoneal injection once a day for four weeks (n = 8/group). (D and E) *In vivo* quantification of the maximal intraluminal diameters (D) and growth rate (E) of the suprarenal aorta by ultrasound one week before (0) and 1–4 weeks after Aldo-salt with flutamide or vehicle administration (n = 8/group). (F) *Ex vivo* measurement of the maximal external diameters of the suprarenal aorta by microscopy four weeks after Aldo-salt with flutamide or vehicle administration (n = 8/group). (G) The incidence of AAA in mice four weeks after Aldo-salt with flutamide or vehicle administration. (H) MAP was measured one week before (basal) and three weeks after Aldo-salt with flutamide or vehicle administration (n = 8/group). The data were expressed as mean ± SEM and analyzed by two-tailed unpaired *t*-test (A–C, E, and F), two-way ANOVA with multiple comparison tests (D and H), and two-sided Chi-square test (G). \*,  $P < 0.05$ ; \*\*,  $P < 0.01$ ; \*\*\*,  $P < 0.001$ ; \*\*\*\*,  $P < 0.0001$ ; ns, not significant.



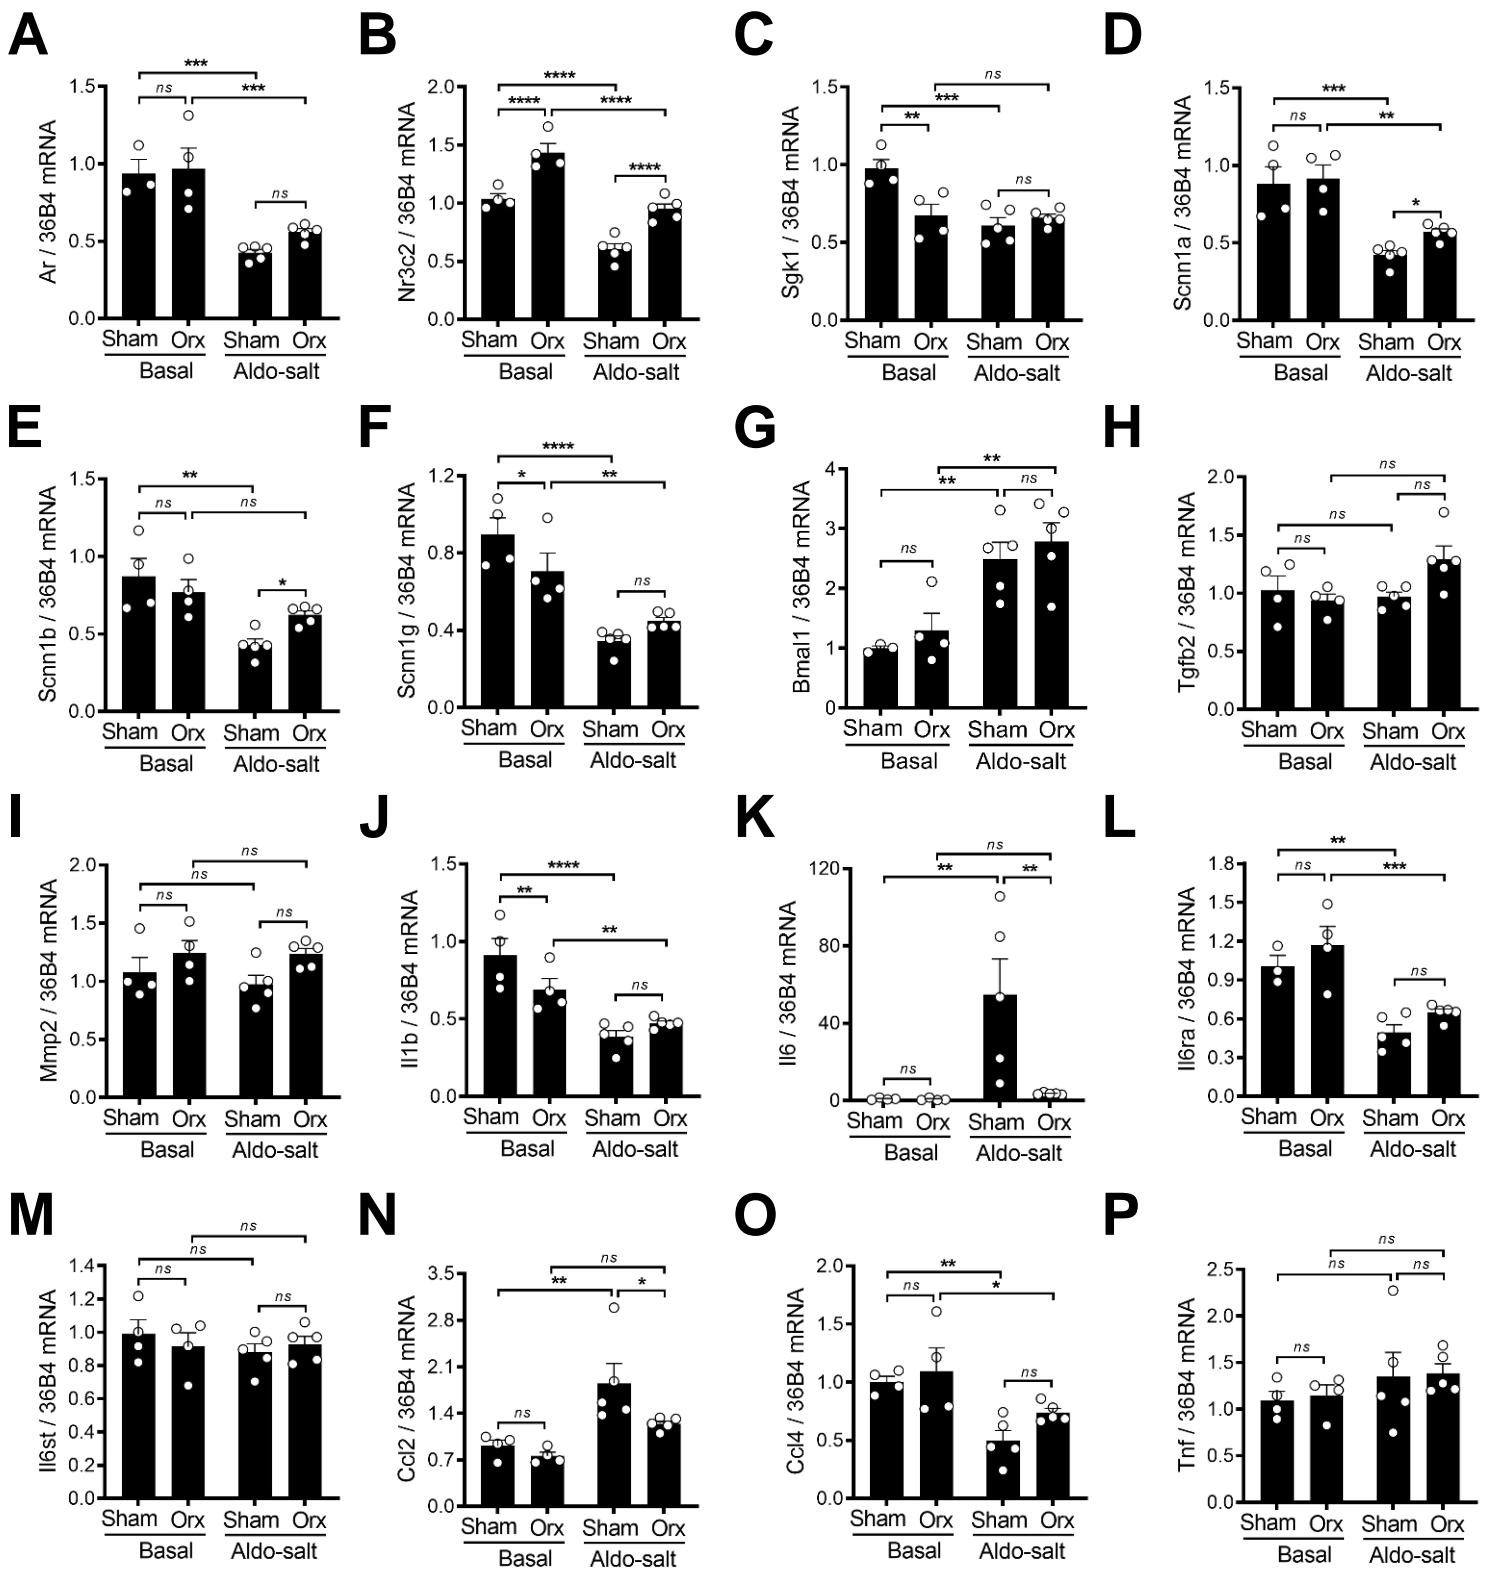

**Supplemental Figure 9. Effects of gonadal androgen deprivation on mRNA expression in the aorta in mice administered Aldo-salt.** The mRNA expressions in the whole aortas were determined by real-time PCR and normalized to 36B4, a housekeeping gene, in 10-month-old orchietomized and sham-operated C57BL/6J mice with and without (basal) Aldo-salt administration for ten days. (A) *Ar* (androgen receptor). (B) *Nr3c2* (mineralocorticoid receptor). (C) *Sgk1* (serum and glucocorticoid-regulated Kinase 1). (D) *Scnn1a* (sodium channel epithelial 1 subunit alpha; ENaC $\alpha$ ). (E) *Scnn1b* (*Scnn1* subunit beta; ENaC $\beta$ ). (F) *Scnn1g* (*Scnn1* subunit gamma; ENaC $\gamma$ ). (G) *Bmal1*. (H) *Tgfb2* (TGF $\beta$ 2). (I) *Mmp2*. (J) *Il1b* (IL-1 $\beta$ ). (K) *Il6* (IL-6). (L) *Il6ra* (IL-6 receptor alpha; IL-6R $\alpha$ ). (M) *Il6st* (IL-6 signal transducer; IL-6R $\beta$  or gp130). (N) *Ccl2* (MCP-1). (O) *Ccl4*. (P) *Tnf* (TNF- $\alpha$ ). N = 3-5/group. Data were expressed as mean  $\pm$  SEM and analyzed by two-way ANOVA for multiple comparison tests. \*,  $P < 0.05$ ; \*\*,  $P < 0.01$ ; \*\*\*,  $P < 0.001$ ; \*\*\*\*,  $P < 0.0001$ ; ns, not significant.

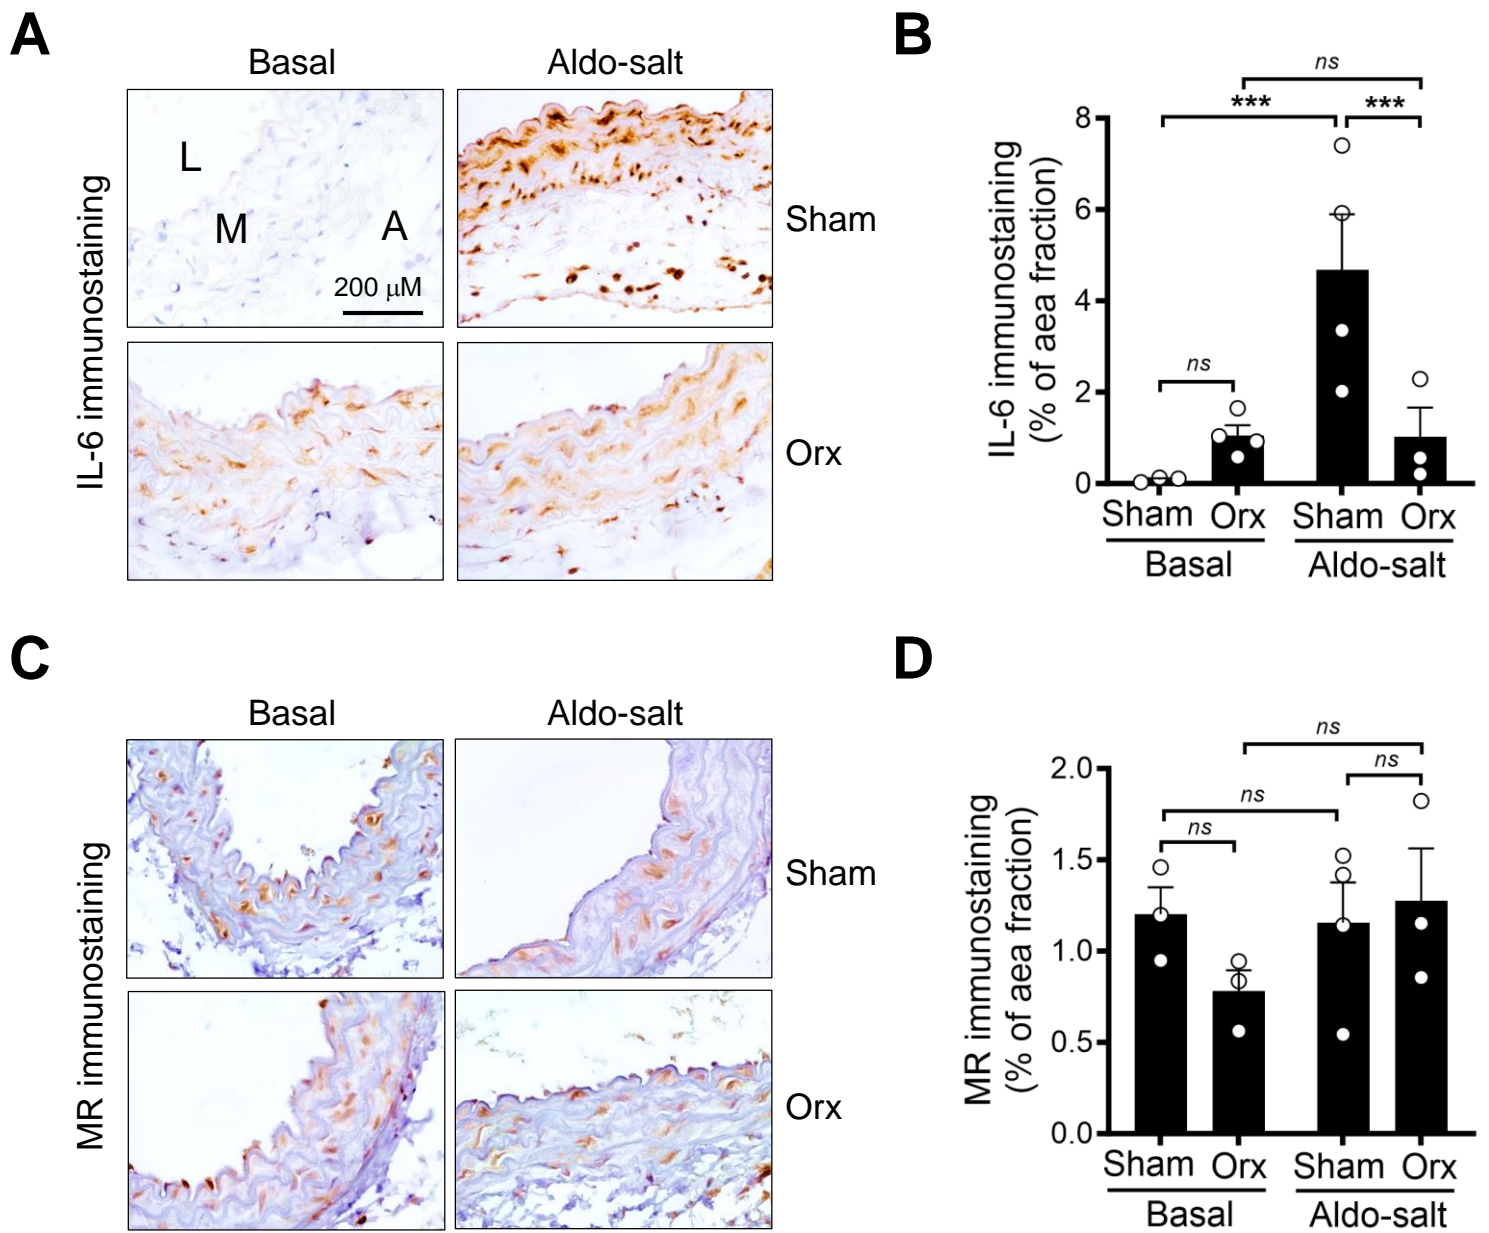

**Supplemental Figure 10. Gonadal androgen deprivation affects the IL-6 but not MR protein expression in the suprenal aorta before and after Aldo-salt administration.** (A and B) Representative immunostaining and quantitative data of IL-6 in the cross-sections of the suprenal aorta in 10-month-old orchiectomized and sham-operated C57BL/6J mice with and without (basal) 10-day Aldo-salt administration ( $n = 3-4$ /group). (C and D) Representative immunostaining and quantitative data of MR in the cross-sections of the suprenal aorta in 10-month-old orchiectomized and sham-operated C57BL/6J mice with and without (basal) 10-day Aldo-salt administration ( $n = 3-4$ /group). L, lumen. M, media. A, adventitia. The percentage of areas fraction = (positive areas / areas of fields of view)  $\times$  100%. The data were calculated from three fields of view randomly photographed per aortic section per mouse. The data were expressed as mean  $\pm$  SEM and analyzed by two-way ANOVA with multiple comparison tests. \*\*,  $P < 0.01$ ; ns, not significant.

**A**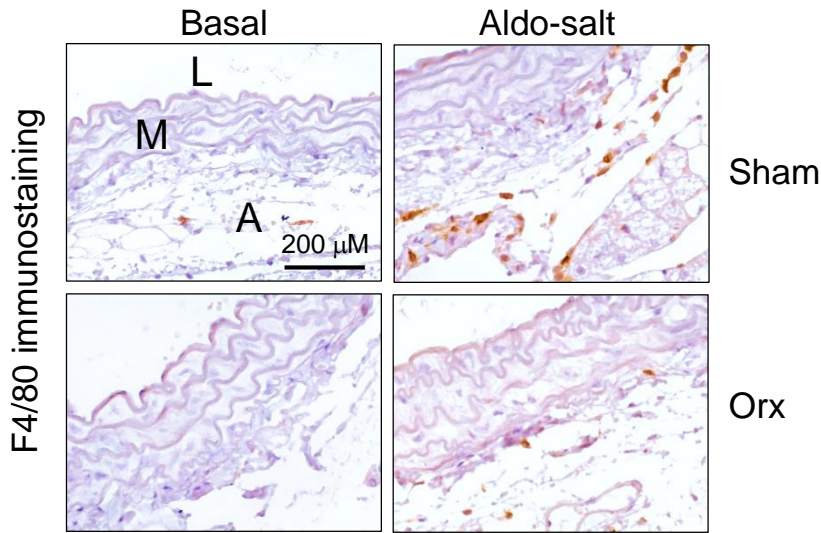**B**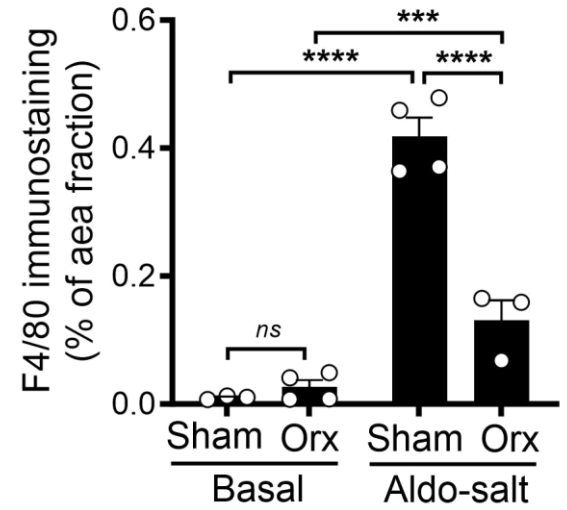

**Supplemental Figure 11. Gonadal androgen deprivation abolishes Aldo-salt-induced macrophage infiltration in the abdominal aorta.** Representative immunostaining (A) and quantitative data (B) of macrophage immunostaining with anti-F4/80 Ab in the cross-sections of the suprarenal aorta in 10-month-old C57BL/6J mice with orx or sham operation ten days after Aldo-salt relative to those without Aldo-salt (basal) administration ( $n = 3-4/\text{group}$ ). L, lumen. M, media. A, adventitia. The percentage of areas fraction = (the F4/80 positive area / the area of fields of view)  $\times$  100%. The data were calculated from three fields of view randomly photographed per aortic section per mouse. The data were expressed as mean  $\pm$  SEM and analyzed by two-way ANOVA with multiple comparison tests \*\*,  $P < 0.01$ ; \*\*\*\*,  $P < 0.0001$ ; ns, not significant.

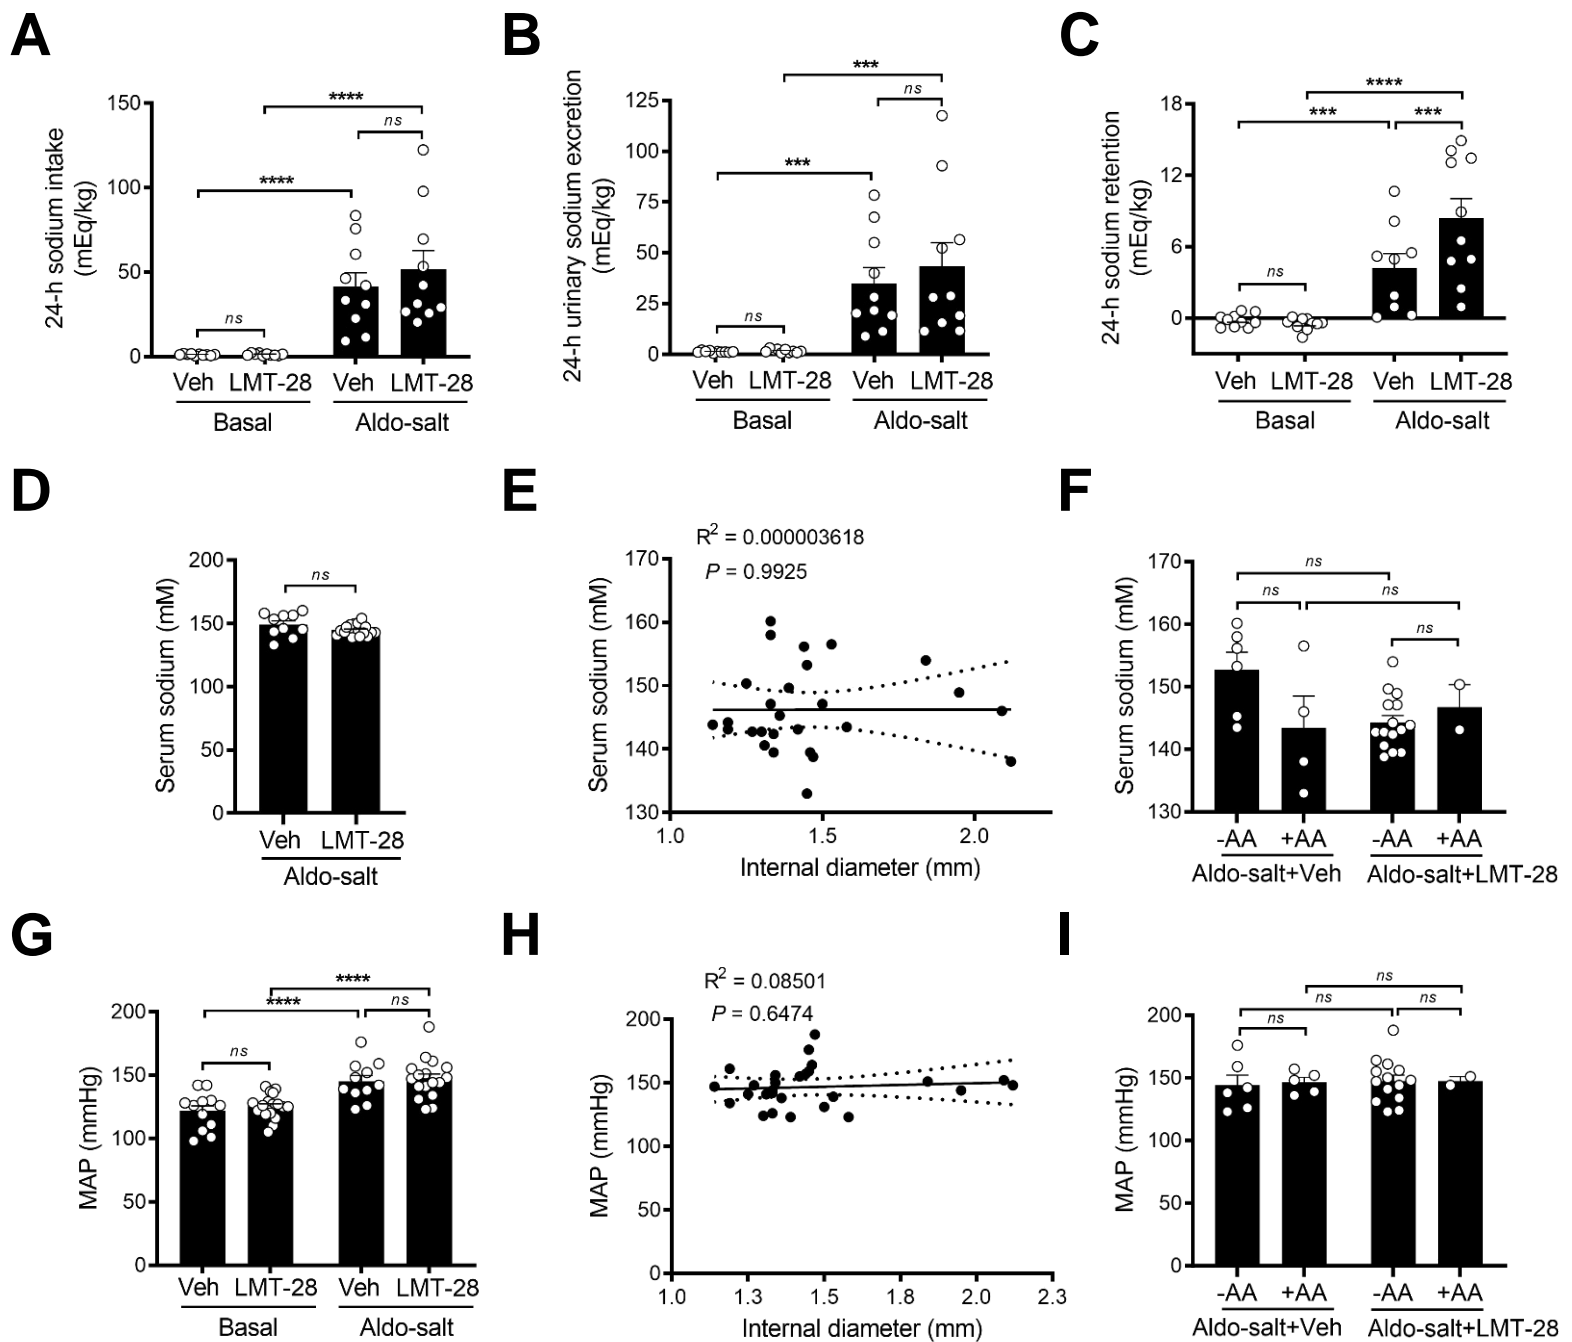

**Supplemental Figure 12. LMT-28 has no effect on Aldo-salt-induced renal sodium retention and hypertension.**

(A–C) 24-h sodium intake (A), urinary sodium excretion (B), and sodium retention (C) were measured in 10-month-old male C57BL/6J mice one week before (basal) and three weeks after Aldo-salt with LMT-28 or vehicle (Veh) administration ( $n = 10/\text{group}$ ). (D) Serum sodium levels of the mice four weeks after Aldo-salt with LMT-28 or vehicle administration ( $n = 10\text{-}17/\text{group}$ ). (E) Correlation analysis of the internal diameter of the suprarenal aorta and serum sodium levels in mice four weeks after Aldo-salt with LMT-28 or vehicle administration ( $n = 27/\text{group}$ ). (F) Serum sodium levels of the mice with and without AA four weeks after Aldo-salt with LMT-28 or vehicle administration ( $n = 2\text{-}15/\text{group}$ ). (G) MAP was measured one week before (basal) and three weeks after Aldo-salt with LMT-28 or vehicle administration ( $n = 9\text{-}18/\text{group}$ ). (H) Correlation analysis of the MAP and internal diameter of the suprarenal aorta four weeks after Aldo-salt with LMT-28 or vehicle administration ( $n = 27/\text{group}$ ). (I) MAP of the mice administered Aldo-salt with LMT-28 or vehicle administration and with (+) and without (-) AA ( $n = 2\text{-}15/\text{group}$ ). Data were expressed as mean  $\pm$  SEM and analyzed by two-way ANOVA for multiple comparison tests (A, B, C, F, G, and I), two-tailed unpaired  $t$ -test (D), and simple linear regression analysis (E and H). \*\*,  $P < 0.01$ ; \*\*\*,  $P < 0.001$ ; \*\*\*\*,  $P < 0.0001$ ; ns, not significant.

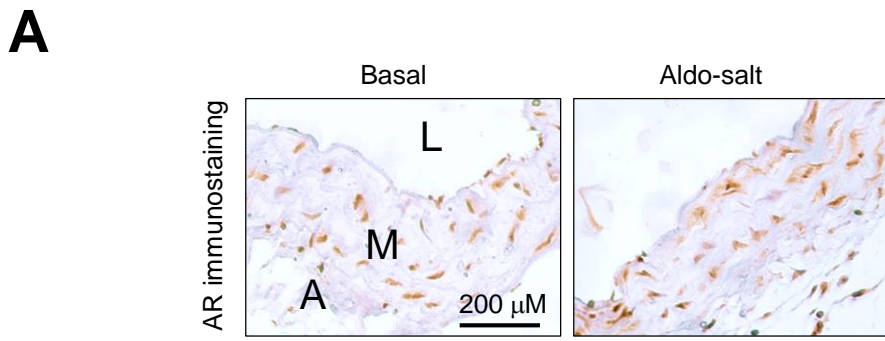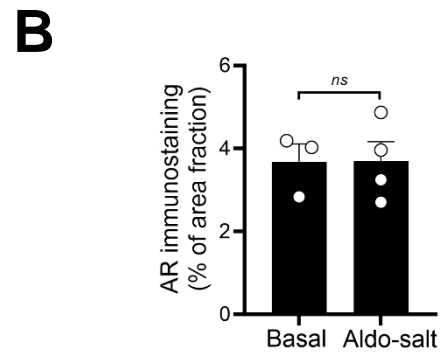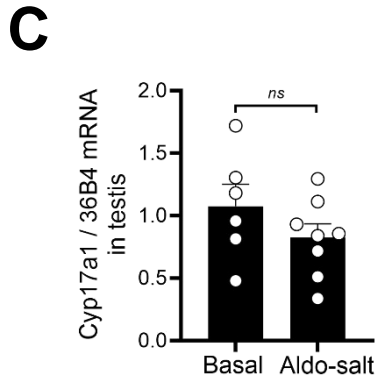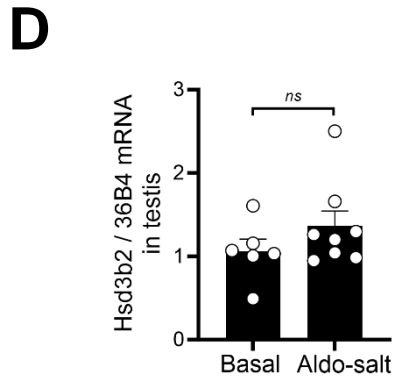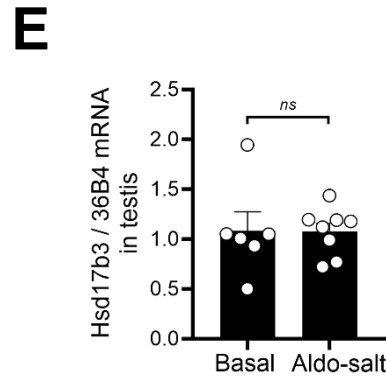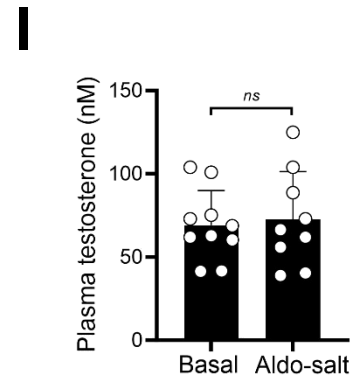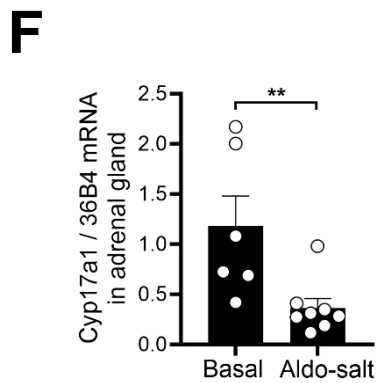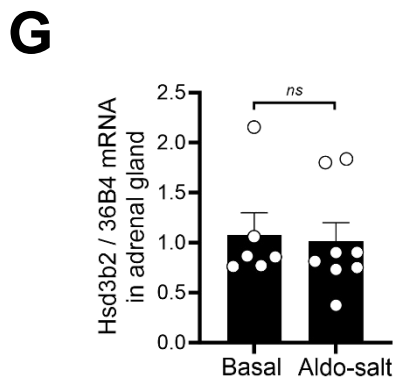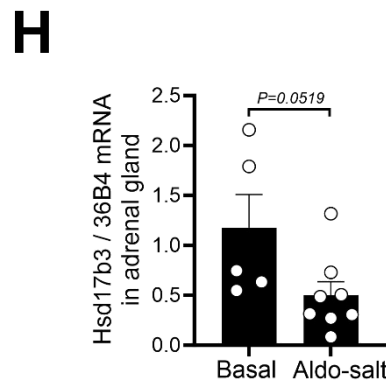

**Supplemental Figure 13. Effect of Aldo-salt on androgen receptor and androgen synthesis expression in the aorta, testis, and adrenal gland in mice administered Aldo-salt.** (A and B) Representative immunostaining (A) and quantitative data (B) of androgen receptor (AR) protein expression in the cross-section of the abdominal aorta in 10-month-old male C57BL/6J mice ten days after Aldo-salt relative to those without Aldo-salt (basal) administration (n = 3-4/group). (C-H) The mRNA expressions in the testis and adrenal gland were determined by real-time PCR and normalized to 36B4 in 10-month-old male C57BL/6J mice with and without (basal) 10-day Aldo-salt administration. Cytochrome P450, family 17, subfamily a, polypeptide 1 (Cyp17a1; C and F), hydroxysteroid (17-beta) dehydrogenase 3 (Hsd17b3; D and G), and hydroxy-delta-5-steroid dehydrogenase, 3 beta- and steroid delta-isomerase 2 (Hsd3b2; E and H) mRNA expressions in the testis (C-E; n = 6-8/group) and adrenal gland (F-H; n = 5-8/group). (I) Plasma testosterone levels in mice with and without (basal) 10-day Aldo-salt administration (n = 9-10/group). One symbol in the figures represents one mouse. The data were expressed as mean  $\pm$  SEM and analyzed by a two-tailed unpaired *t*-test; \*\*, *P* < 0.01; ns, not significant.

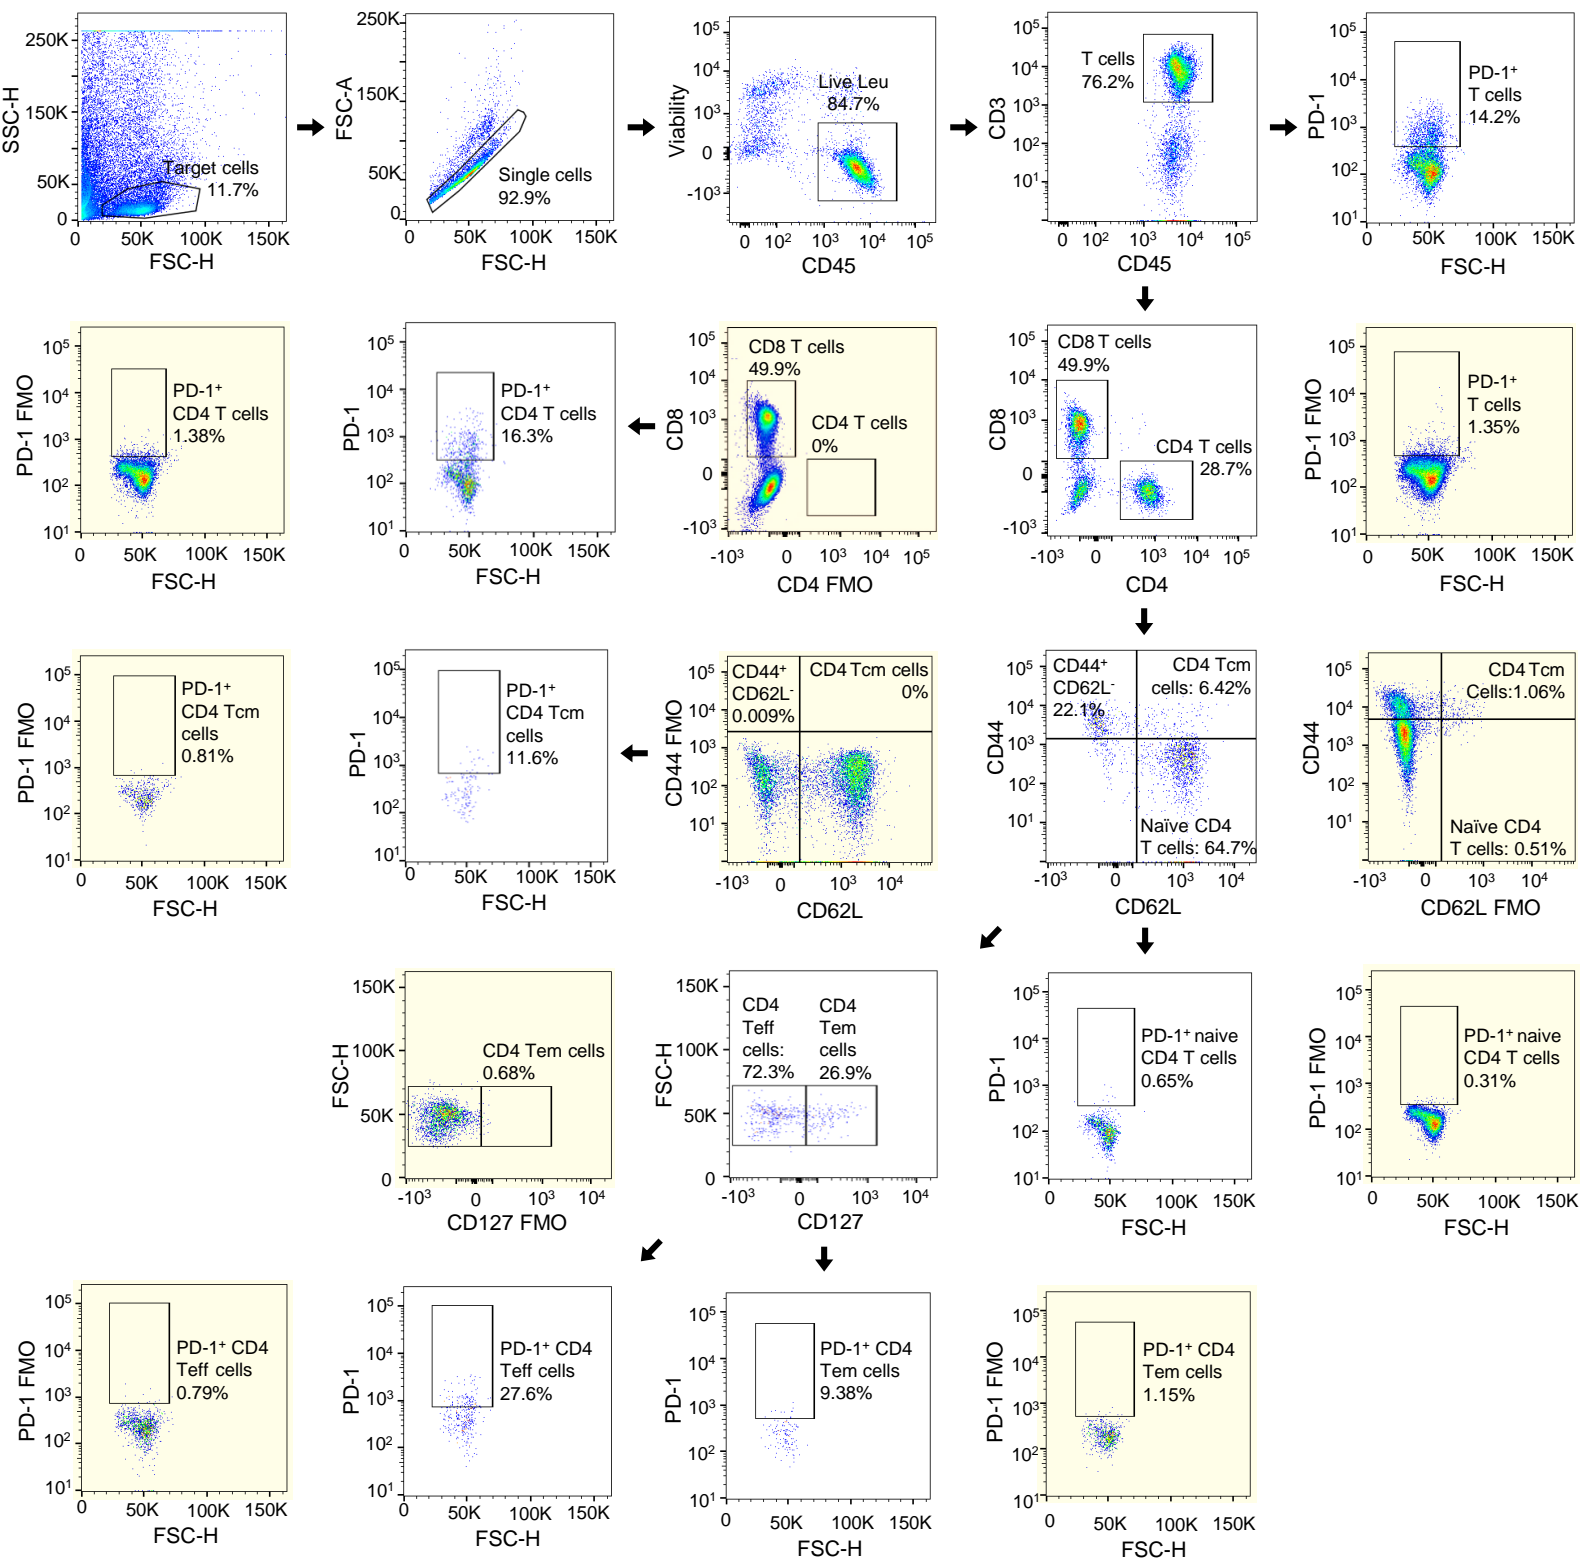

**Supplemental Figure 14. Gating strategy of the flow cytometry analysis to identify CD4 T cell subsets in the mouse aorta.** Single cells were prepared from the whole aortas of mice and gated in by a forward scatter height (FSC-H) vs. side scatter height (SSC-H) pseudocolor plot. The aortic single cells were gated on CD45 vs. live/dead cell staining to select viable leukocytes (Leu; CD45<sup>+</sup>) and then gated on CD3, CD4, and CD8 to identify T cells (CD45<sup>+</sup>CD3<sup>+</sup>), CD4 helper T cells (CD45<sup>+</sup>CD3<sup>+</sup>CD4<sup>+</sup>), and CD8 cytotoxic T cells (CD45<sup>+</sup>CD3<sup>+</sup>CD8<sup>+</sup>), respectively. The CD4 T cells were then gated on CD44 and CD62L to identify CD4 central memory T cells (CD4Tcm; CD45<sup>+</sup>CD3<sup>+</sup>CD4<sup>+</sup>CD44<sup>+</sup>CD62L<sup>+</sup>), CD4 naïve T cells (CD45<sup>+</sup>CD3<sup>+</sup>CD4<sup>+</sup>CD44<sup>-</sup>CD62L<sup>+</sup>), and CD4 CD44<sup>+</sup>CD62L<sup>-</sup> T cells, respectively. The CD44<sup>+</sup>CD62L<sup>-</sup> T cells were then gated on CD127 to identify CD4 effector T cells (CD4 Teff; CD45<sup>+</sup>CD3<sup>+</sup>CD4<sup>+</sup>CD44<sup>+</sup>CD62L<sup>-</sup>CD127<sup>-</sup>) and CD4 effector memory T cells (CD4 Tem; CD45<sup>+</sup>CD3<sup>+</sup>CD4<sup>+</sup>CD44<sup>+</sup>CD62L<sup>-</sup>CD127<sup>+</sup>), respectively. All T cell subsets were gated on PD-1 to identify PD-1<sup>+</sup> T cell subsets. The single cells were also prepared from the spleen and analyzed by flow cytometry with fluorescence minus one (FMO; labeled with a yellow background in pseudocolor plots) to define the gating boundaries and ensure the specificity of antibodies.

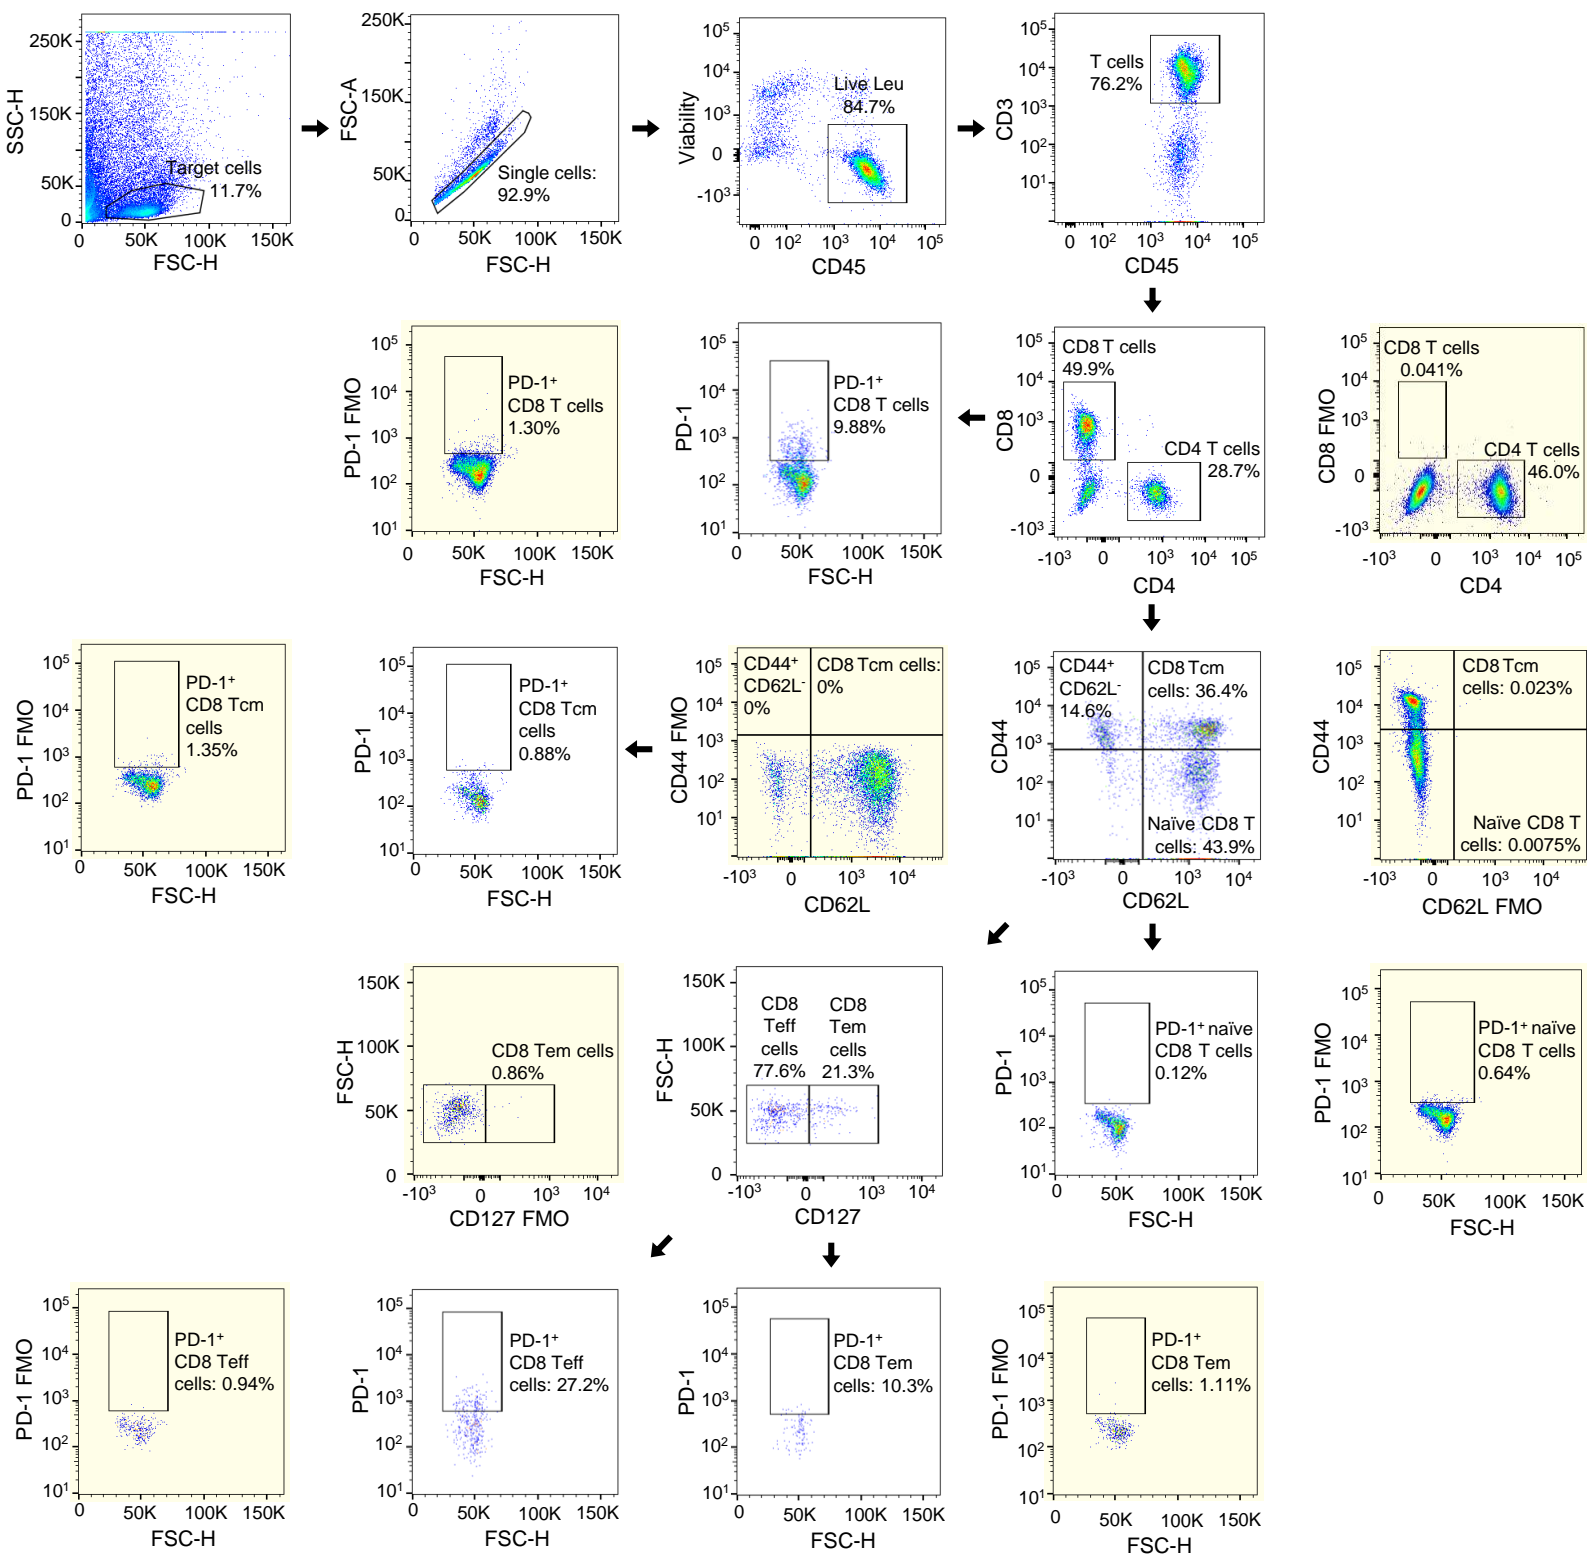

**Supplemental Figure 15. Gating strategy of the flow cytometry analysis to identify CD8 T cell subsets in the mouse aorta.** Single cells were prepared from the whole aortas of mice and gated in by a forward scatter height (FSC-H) vs. side scatter height (SSC-H) pseudocolor plot. The aortic single cells were gated on CD45 vs. live/dead cell staining to select viable leukocytes (Leu; CD45<sup>+</sup>) and then gated on CD3, CD4, and CD8 to identify total T cells (CD45<sup>+</sup>CD3<sup>+</sup>), CD4 helper T cells (CD45<sup>+</sup>CD3<sup>+</sup>CD4<sup>+</sup>), and CD8 cytotoxic T cells (CD45<sup>+</sup>CD3<sup>+</sup>CD8<sup>+</sup>), respectively. The CD8 T cells were then gated on CD44 and CD62L to identify CD8 central memory T cells (CD8Tcm; CD45<sup>+</sup>CD3<sup>+</sup>CD8<sup>+</sup>CD44<sup>+</sup>CD62L<sup>+</sup>), CD8 naïve T cells (CD45<sup>+</sup>CD3<sup>+</sup>CD8<sup>+</sup>CD44<sup>-</sup>CD62L<sup>+</sup>), and CD8 CD44<sup>+</sup>CD62L<sup>-</sup> T cells, respectively. The CD44<sup>+</sup>CD62L<sup>-</sup> T cells were then gated on CD127 to identify CD8 effector T cells (CD8 Teff; CD45<sup>+</sup>CD3<sup>+</sup>CD8<sup>+</sup>CD44<sup>+</sup>CD62L<sup>-</sup>CD127<sup>-</sup>) and CD8 effector memory T cells (CD8 Tem; CD45<sup>+</sup>CD3<sup>+</sup>CD8<sup>+</sup>CD44<sup>+</sup>CD62L<sup>-</sup>CD127<sup>+</sup>), respectively. All T cell subsets were gated on PD-1 to identify PD-1<sup>+</sup> T cell subsets. The single cells were also prepared from the spleen and analyzed by flow cytometry with fluorescence minus one (FMO; labeled with a yellow background in pseudocolor plots) to define the gating boundaries and ensure the specificity of antibodies.

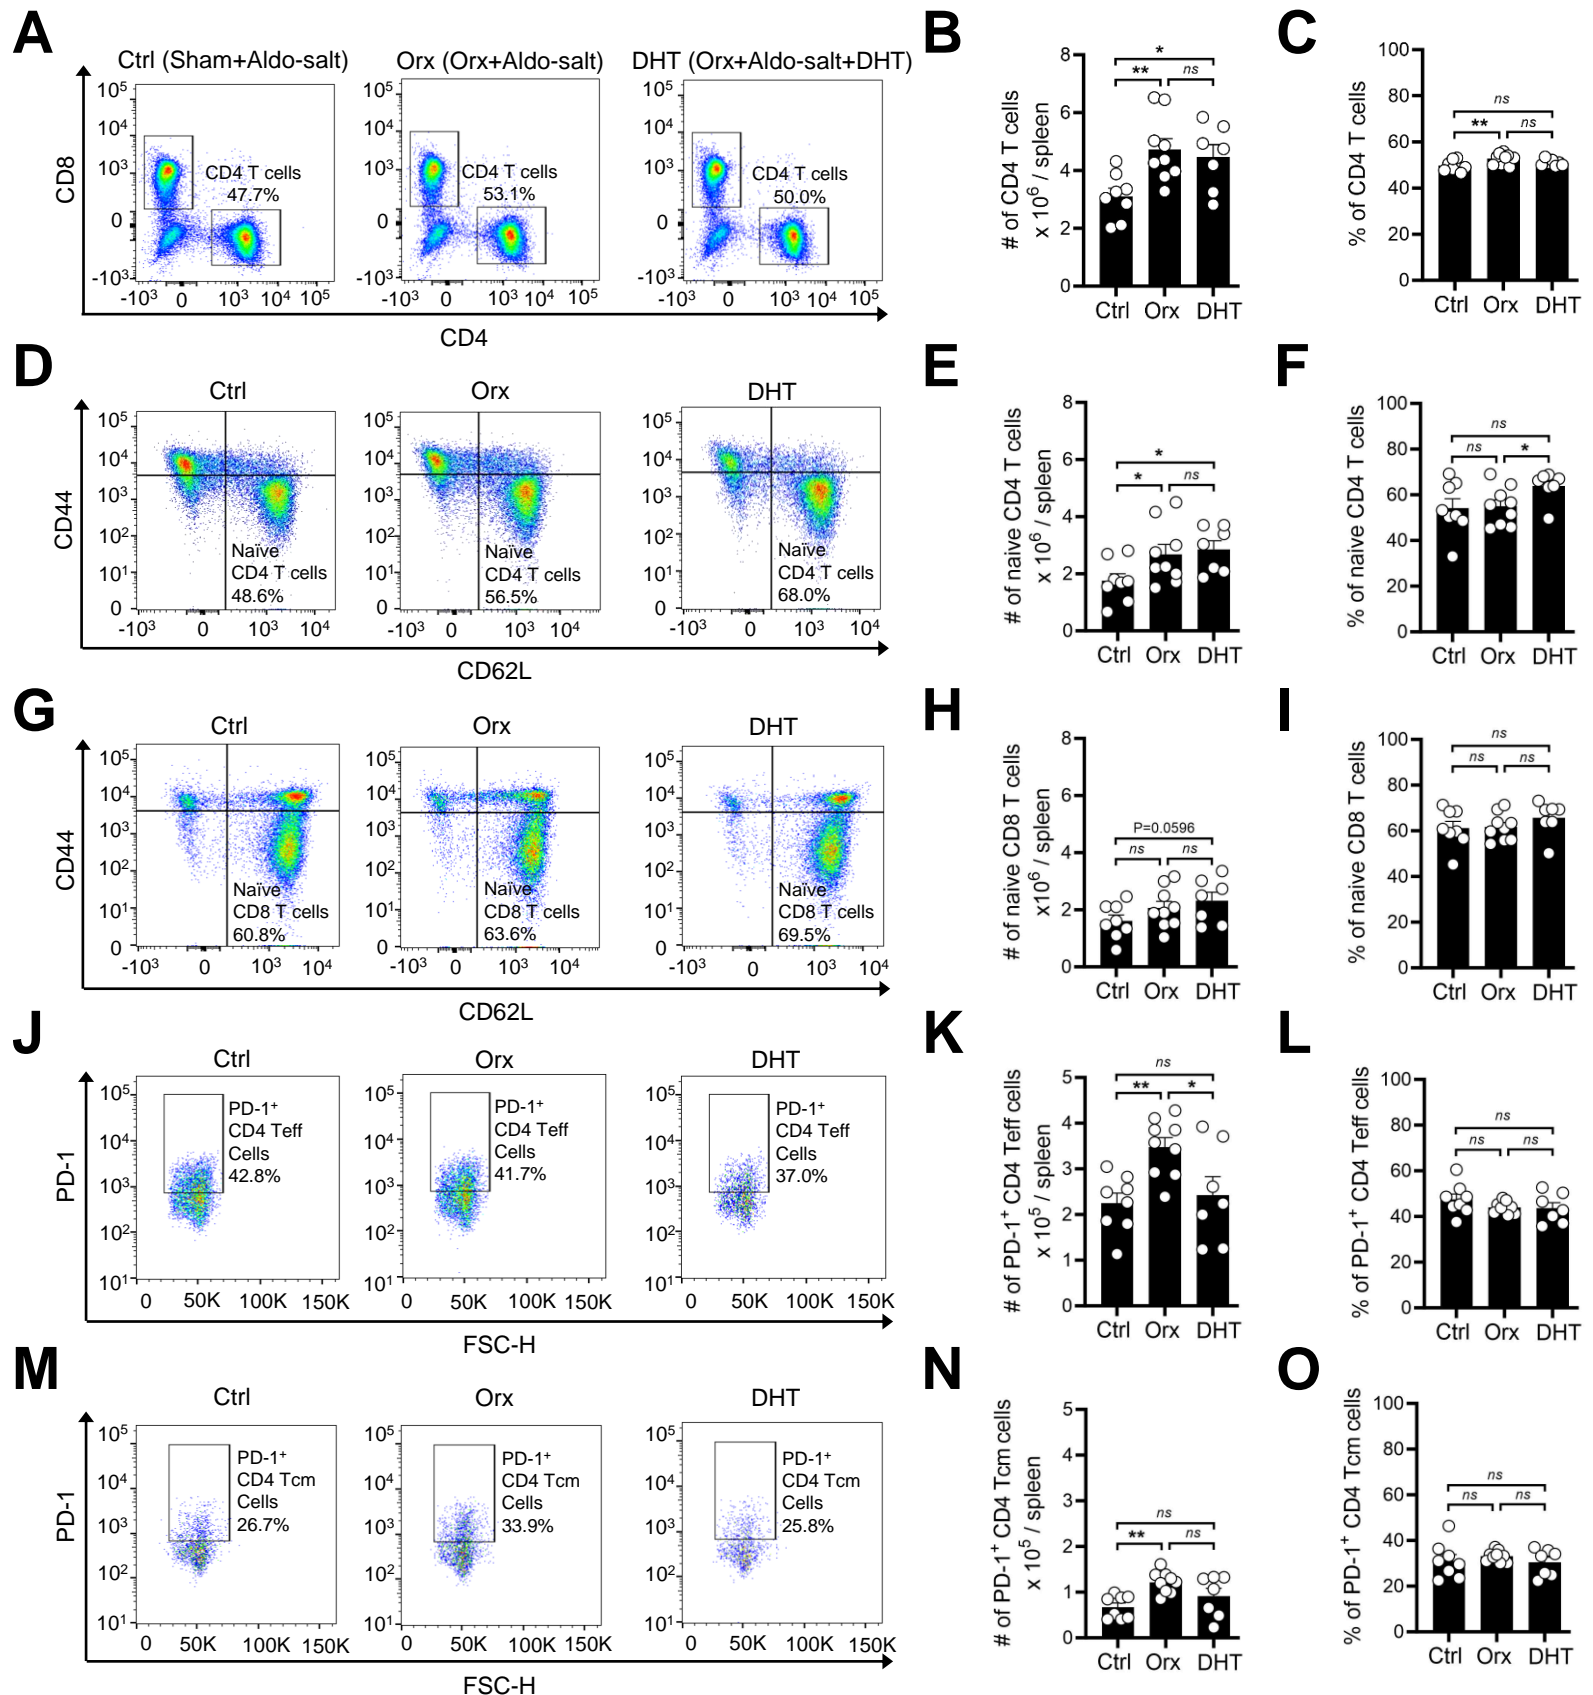

**Supplemental Figure 16. Flow cytometry analysis of T cell subsets in the spleen in orchietomized and sham-operated mice ten days after Aldo-salt with or without DHT administration.** Representative pseudocolor plots and quantitative data of the flow cytometry analysis of the total number (#) and percentage (%) of splenic CD4 T cells (CD45<sup>+</sup>CD3<sup>+</sup>CD4<sup>+</sup>; % in total T cells; **A–C**), naïve CD4 T cells (CD45<sup>+</sup>CD3<sup>+</sup>CD4<sup>+</sup>CD44<sup>–</sup>CD62L<sup>+</sup>; % in total CD4 T cells; **D–F**), naïve CD8 T cells (CD45<sup>+</sup>CD3<sup>+</sup>CD8<sup>+</sup>CD44<sup>–</sup>CD62L<sup>+</sup>; % in total CD8 T cells; **G–I**), PD-1<sup>+</sup> effector CD4 T cells (PD-1<sup>+</sup>CD4 T eff; CD45<sup>+</sup>CD3<sup>+</sup>CD4<sup>+</sup>CD44<sup>+</sup>CD62L<sup>–</sup>CD127<sup>–</sup>PD-1<sup>+</sup>; % in total CD4 T eff cells; **J–L**), and PD-1<sup>+</sup> central memory CD4 T cells (PD-1<sup>+</sup>CD4 Tcm; CD45<sup>+</sup>CD3<sup>+</sup>CD4<sup>+</sup>CD44<sup>+</sup>CD62L<sup>+</sup>PD-1<sup>+</sup>; % in total CD4 Tcm cells; **M–O**) in the whole spleen in 9-10-month-old male C57BL/6J mice with orchietomy (Orx) or sham operation (Ctrl) 10 days after Aldo-salt with or without DHT administration (n = 7-9/group). One symbol in the figures represents the cells of one mouse's spleen. The data were expressed as mean  $\pm$  SEM and analyzed by one-way ANOVA with multiple comparison tests. \*,  $P < 0.05$ ; \*\*,  $P < 0.01$ ; ns, not significant.



**A**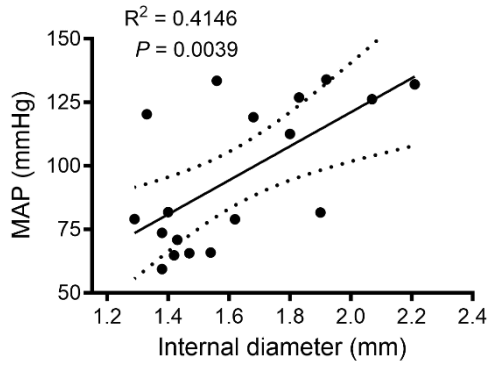**B**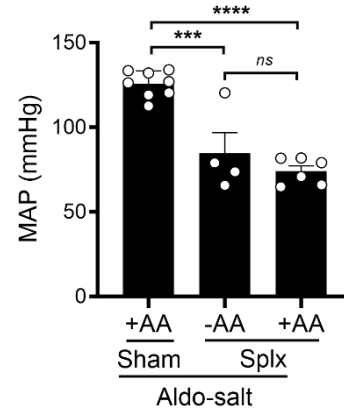

**Supplemental Figure 17. Blood pressure, aortic dilation, and aortic aneurysms in splenectomized mice administered Aldo-salt.** (A) Correlation analysis of MAP and the internal diameter of the suprarenal aorta in 11-13-month-old male C57BL/6J mice with splenectomy (splx) and sham operation three weeks after Aldo-salt administration ( $n = 18/\text{group}$ ). (B) MAP in splenectomized and sham-operated mice administered Aldo-salt with (+) and without (-) aortic aneurysms ( $n = 4-8/\text{group}$ ). Data were expressed as mean  $\pm$  SEM and analyzed by simple linear regression analysis (A) and one-way ANOVA for multiple comparison tests (B). \*\*\*,  $P < 0.001$ ; \*\*\*\*,  $P < 0.0001$ ; ns, not significant.

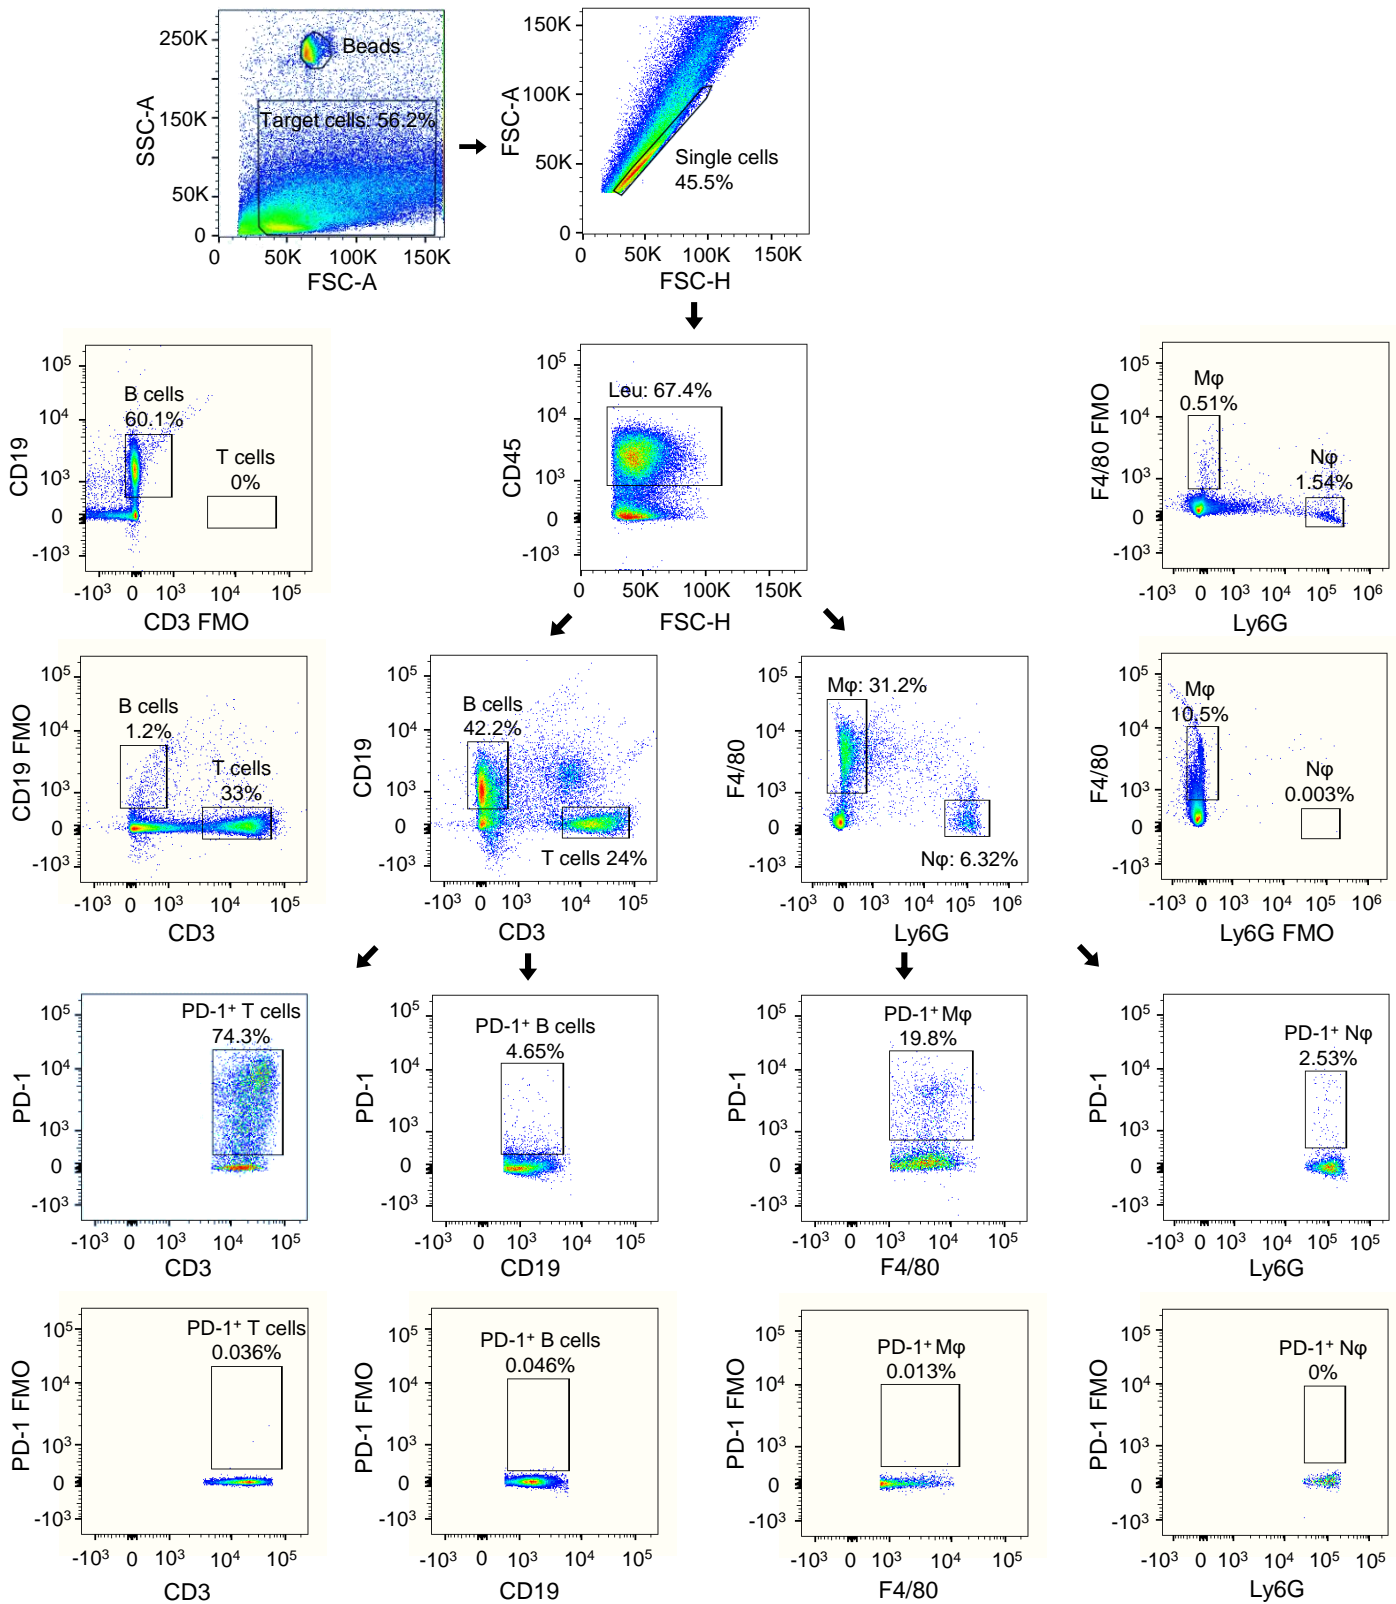

**Supplemental Figure 18. Gating strategy of the flow cytometry analysis to identify PD-1<sup>+</sup> T cells, PD-1<sup>+</sup> B cells, PD-1<sup>+</sup> macrophages, and PD-1<sup>+</sup> neutrophils in the mouse aorta.** Single cells were prepared from the whole aortas and gated in by a forward scatter area (FSC-A) vs. side scatter area (SSC-A) pseudocolor plot. Single cells were gated on CD45<sup>+</sup> to select leukocytes (Leu; CD45<sup>+</sup>) and then gated on CD3<sup>+</sup>, CD19<sup>+</sup>, F4/80<sup>+</sup>, and Ly6G<sup>+</sup> to identify T cells (CD45<sup>+</sup>CD3<sup>+</sup>), B cells (CD45<sup>+</sup>CD19<sup>+</sup>), macrophages (Mφ; CD45<sup>+</sup>F4/80<sup>+</sup>), and neutrophils (Nφ; CD45<sup>+</sup>Ly6G<sup>+</sup>), respectively. The cells were then gated on PD-1<sup>+</sup> to identify PD-1<sup>+</sup> T cells (CD45<sup>+</sup>CD3<sup>+</sup>PD-1<sup>+</sup>), PD-1<sup>+</sup> B cells (CD45<sup>+</sup>CD19<sup>+</sup>PD-1<sup>+</sup>), PD-1<sup>+</sup> macrophages (CD45<sup>+</sup>F4/80<sup>+</sup>PD-1<sup>+</sup>), and PD-1<sup>+</sup> neutrophils (CD45<sup>+</sup>Ly6G<sup>+</sup>PD-1<sup>+</sup>), respectively. The single cells were also prepared from lymph nodes and analyzed by flow cytometry with fluorescence minus one (FMO) (labeled with a yellow background in pseudocolor plots) to define the gating boundaries and ensure the specificity of antibodies.

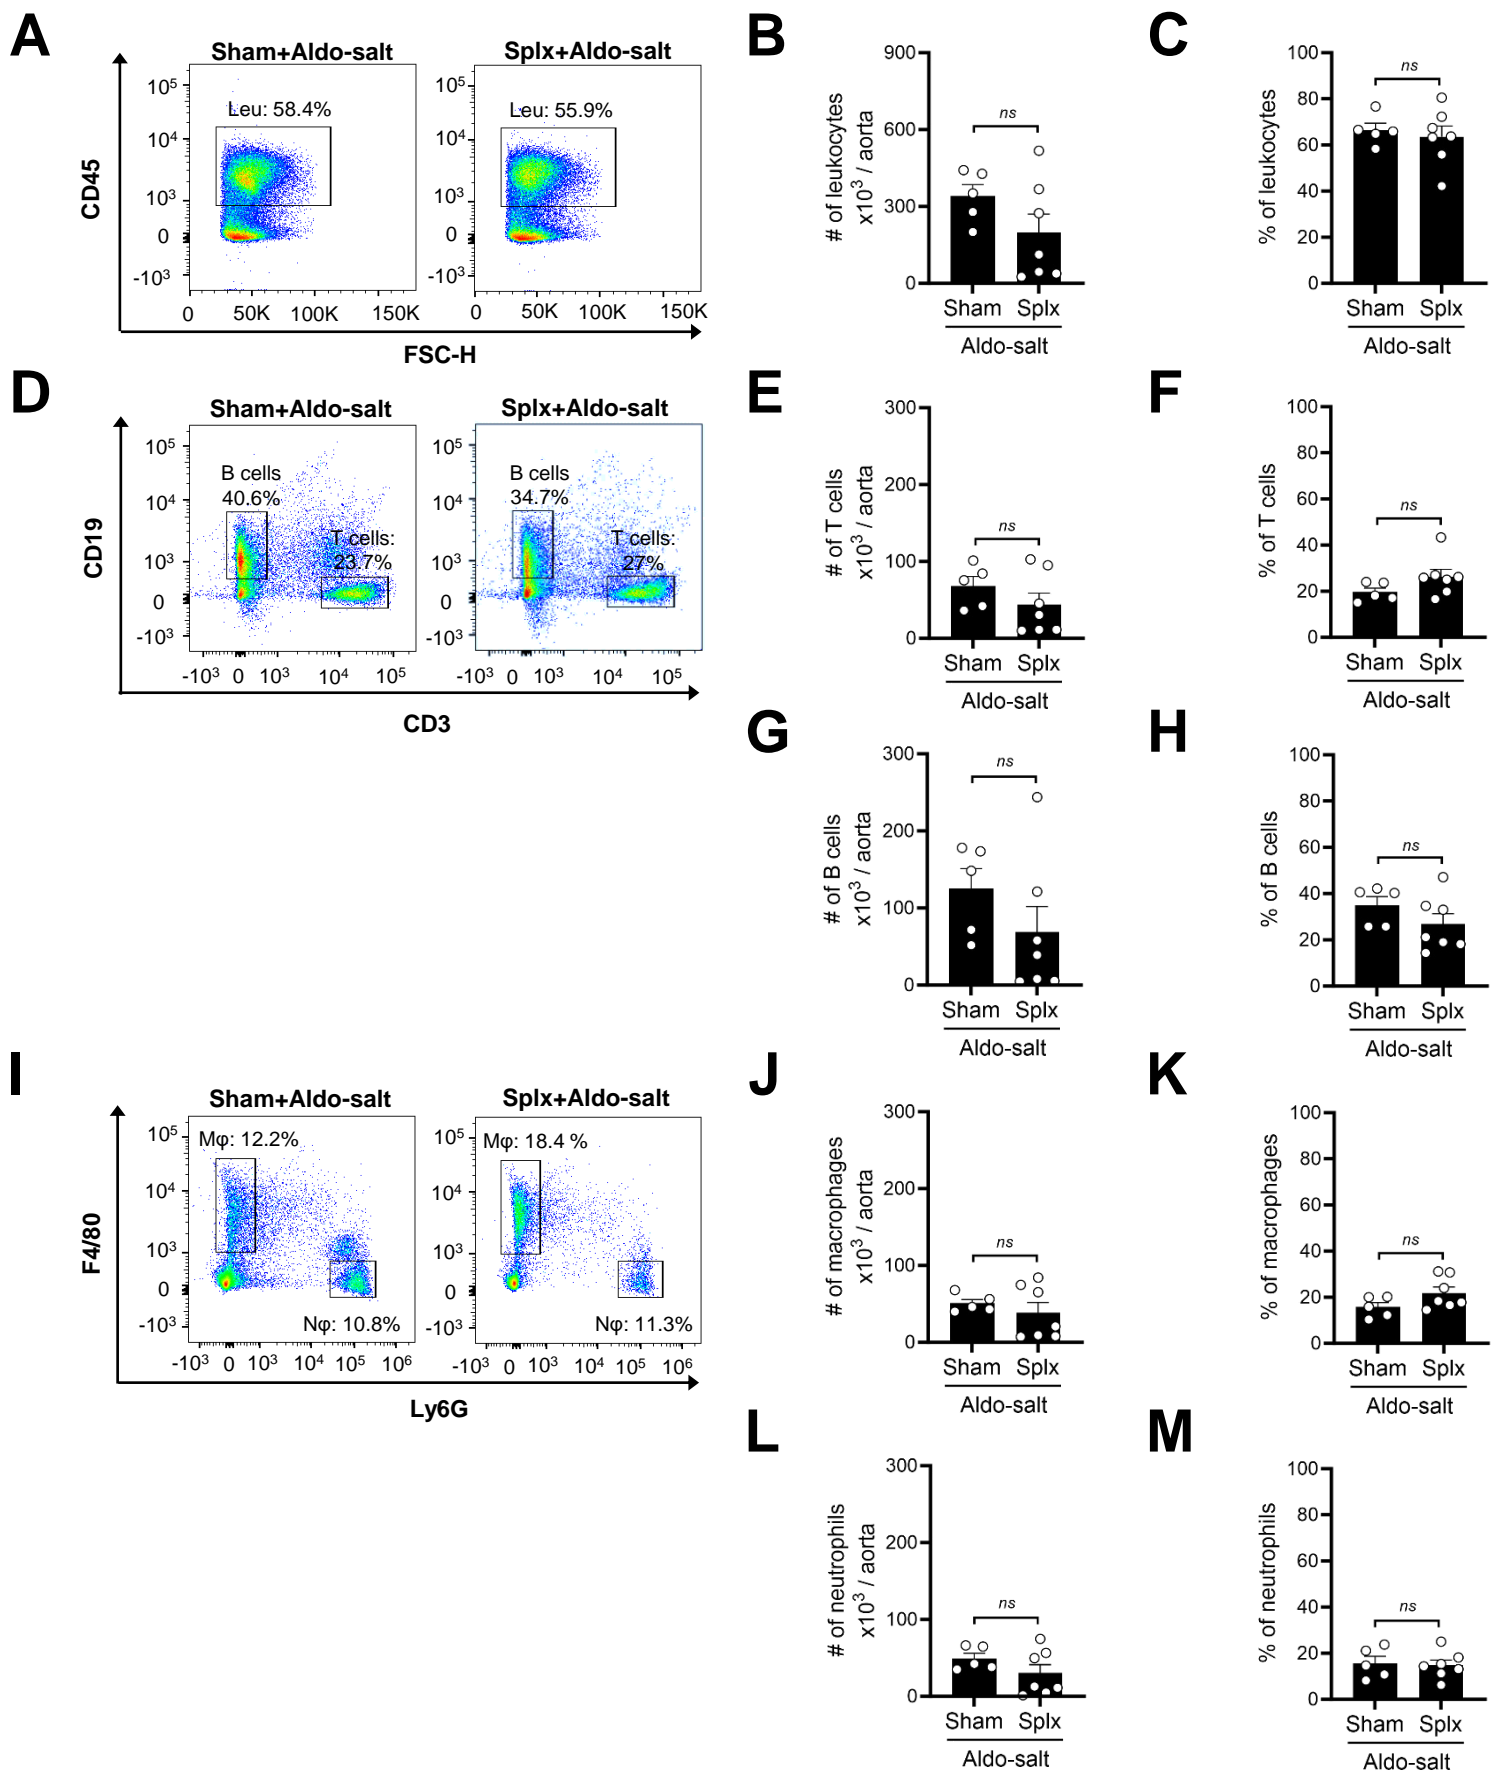

**Supplemental Figure 19. Splenectomy does not alter leukocytes, T cells, B cells, macrophages, and neutrophils in the aorta in mice administered Aldo-salt.** Representative pseudocolor plots and quantitative data of the flow cytometry analysis of the total number (#) and percentage (%) of leukocytes (Leu; CD45<sup>+</sup>; % in total single aortic cells; **A–C**), T cells (CD45<sup>+</sup>CD3<sup>+</sup>; % in total leukocytes; **D–F**), B cells (CD45<sup>+</sup>CD19<sup>+</sup>; % in total leukocytes; **D, G, and H**), macrophages (M $\phi$ ; CD45<sup>+</sup>F4/80<sup>+</sup>; % in total leukocytes; **I–K**), and neutrophils (N $\phi$ ; CD45<sup>+</sup>Ly6G<sup>+</sup>; % in total leukocytes; **I, L, and M**) in the whole aortas in 11–13-month-old male C57BL/6J mice with splenectomy (splx) or sham operation four weeks after Aldo-salt administration ( $n = 5\text{--}7/\text{group}$ ). One symbol in the figures represents the cells of one mouse aorta. The data were expressed as mean  $\pm$  SEM and analyzed by a two-tailed unpaired *t*-test. *ns*, not significant.

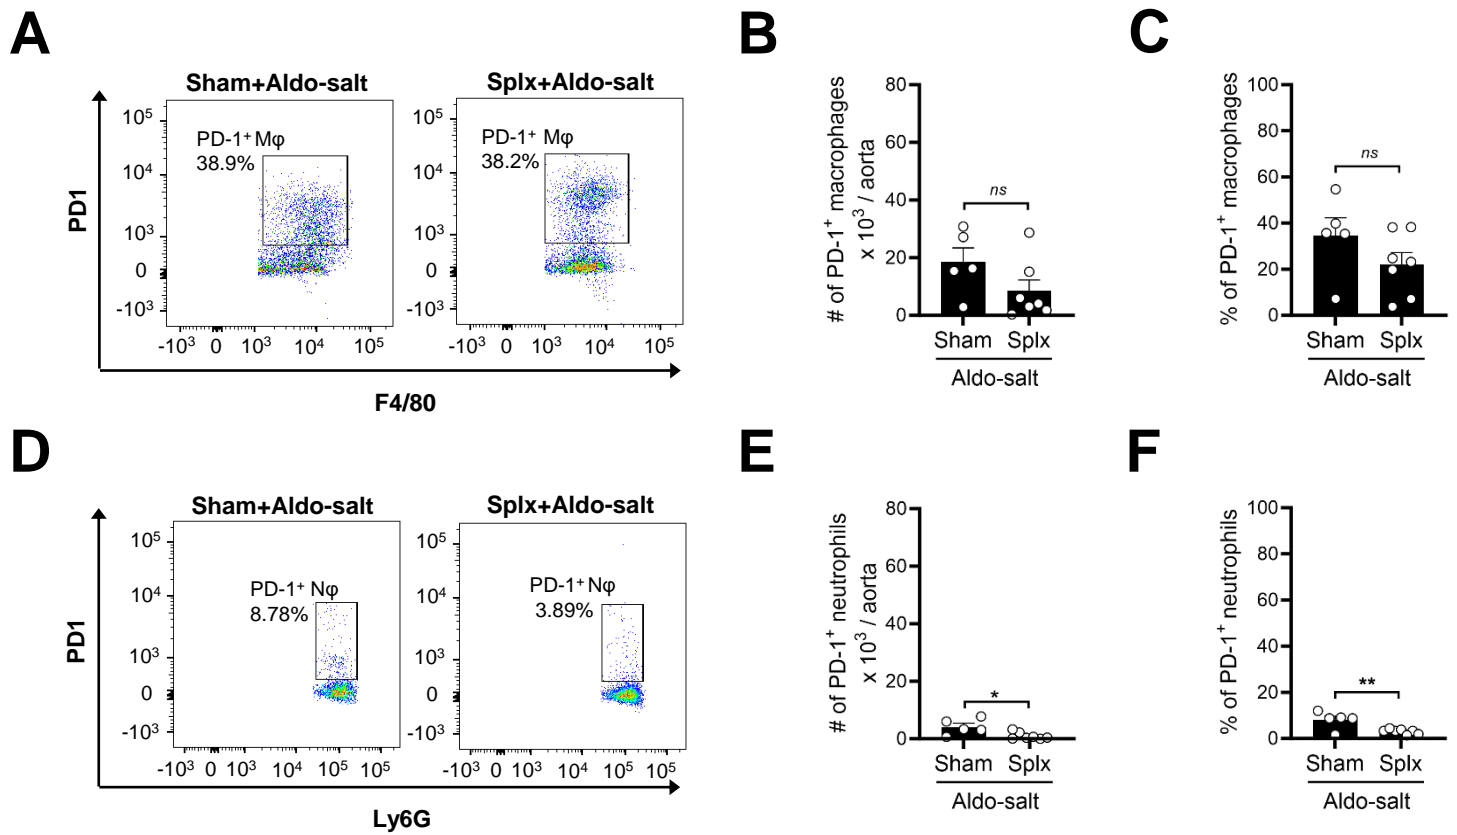

**Supplemental Figure 20. Effects of splenectomy on PD-1+ macrophages and PD-1+ neutrophils in the aorta of mice administered Aldo-salt.** Representative pseudocolor plots and quantitative data of the flow cytometry analysis of the total numbers (#) and percentages (%) of PD-1+ macrophages (PD-1+M $\phi$ ; CD45+F4/80+PD-1+; % in total M $\phi$ ; **A–C**) and PD-1+ neutrophils (PD-1+N $\phi$ ; CD45+Ly6G+PD-1+; % in total N $\phi$ ; **D–F**) in the whole aortas of 11-13-month-old male C57BL/6J mice with splx or sham-operation four weeks after Aldo-salt administration ( $n = 5-7$ /group). One symbol shown in the figures represents cells in one whole mouse's aorta. The data were expressed as mean  $\pm$  SEM and analyzed by a two-tailed unpaired  $t$ -test. \*,  $P < 0.05$ ; \*\*,  $P < 0.01$ . ns, not significant.

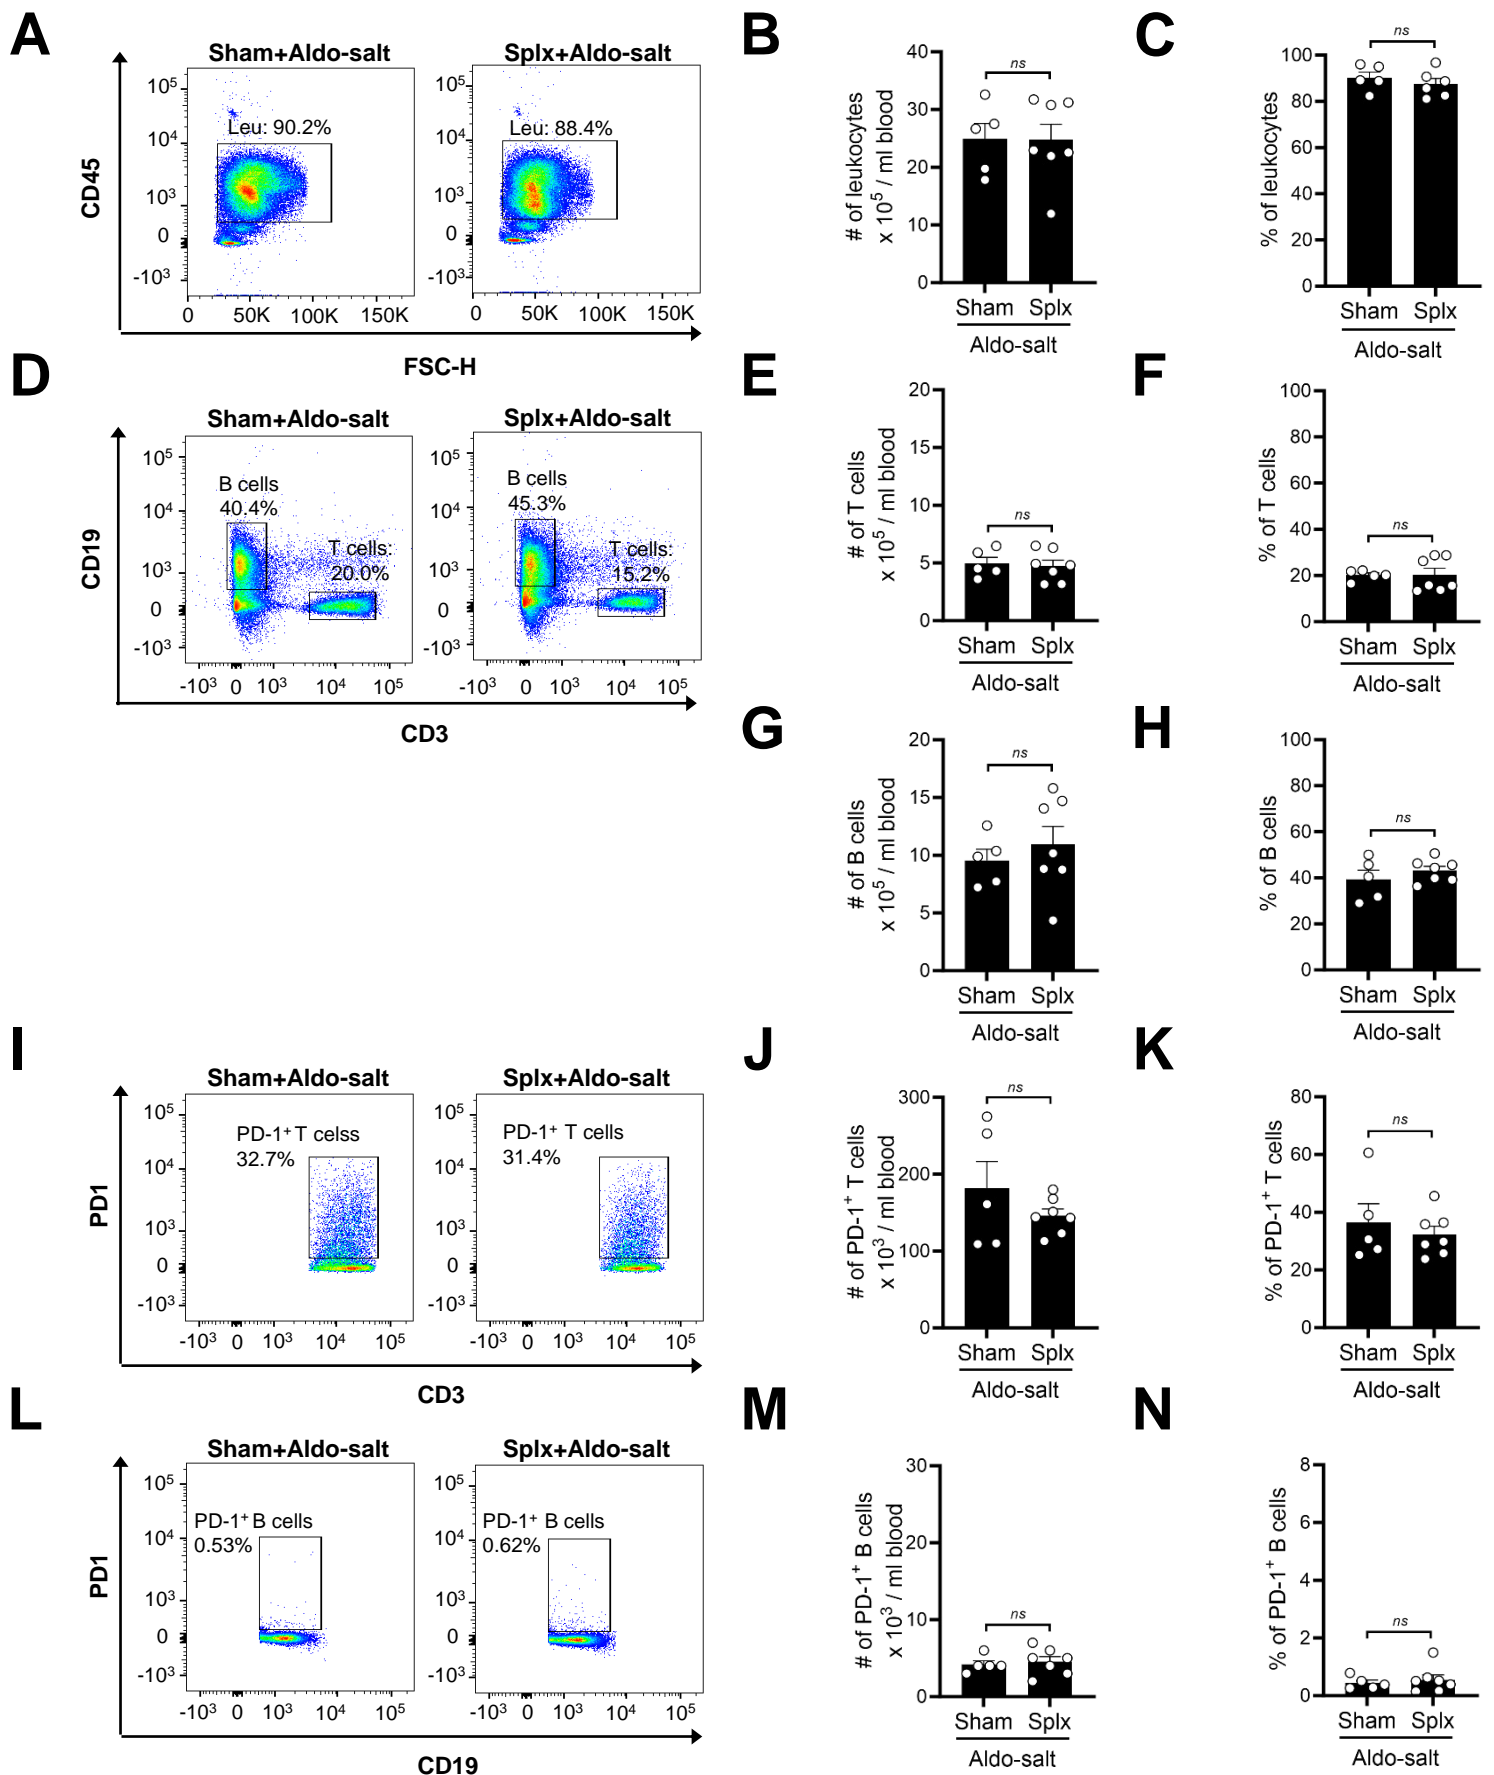

**Supplemental Figure 21. Splenectomy has no effect on PD-1<sup>+</sup> T cells and PD-1<sup>+</sup> B cells in the blood in mice administered Aldo-salt.** Representative pseudocolor plots and quantitative data of the flow cytometry analysis of the total number (#) and percentage (%) of leukocytes (Leu; CD45<sup>+</sup>; % in total blood cells; **A–C**), T cells (CD45<sup>+</sup>CD3<sup>+</sup>; % in total leukocytes; **D–F**), B cells (CD45<sup>+</sup>CD19<sup>+</sup>; % in total leukocytes; **D, G, and H**), PD-1<sup>+</sup> T cells (CD45<sup>+</sup>CD3<sup>+</sup>PD-1<sup>+</sup>; % in total T cells; **I–K**), and PD-1<sup>+</sup> B cells (CD45<sup>+</sup>CD19<sup>+</sup>PD-1<sup>+</sup>; % in total B-cells; **L–N**) in the blood in 11–13-month-old male C57BL/6J mice with splx or sham operation four weeks after Aldo-salt administration ( $n = 5-7$ /group). One symbol represents the cells of one mouse's blood. The data were expressed as mean  $\pm$  SEM and analyzed by a two-tailed unpaired *t*-test. *ns*, not significant.

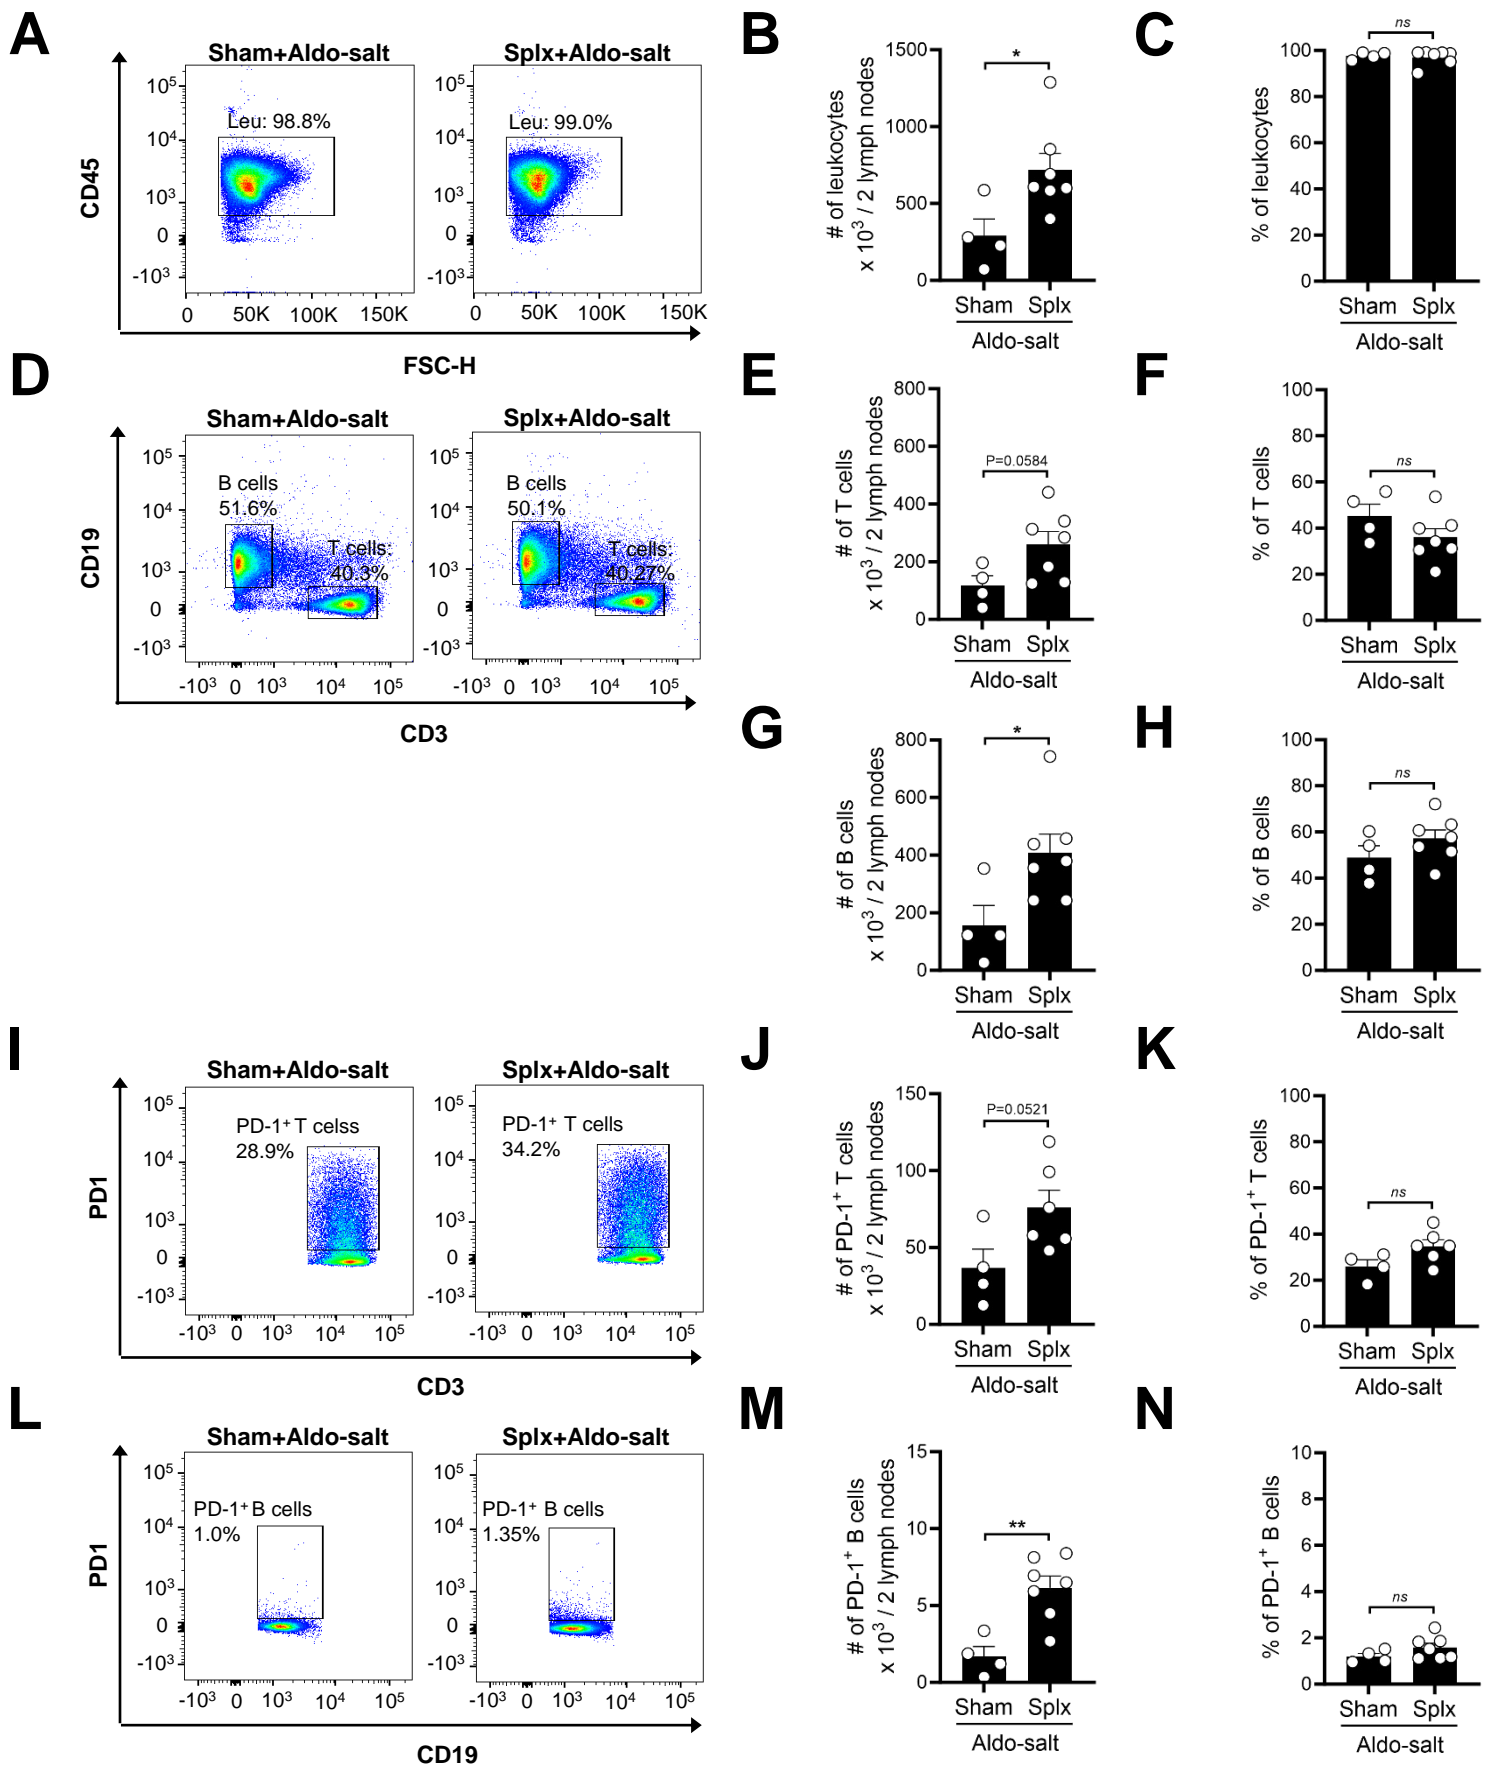

**Supplemental Figure 22. Splenectomy augments PD-1<sup>+</sup> T cells and PD-1<sup>+</sup> B cells in the periaortic lymph nodes in mice administered Aldo-salt.** Representative pseudocolor plots and quantitative data of the flow cytometry analysis of the total number (#) and percentage (%) of leukocytes (Leu; CD45<sup>+</sup>; % in total lymph node cells; **A–C**), T cells (CD45<sup>+</sup>CD3<sup>+</sup>; % in total leukocytes; **D–F**), B cells (CD45<sup>+</sup>CD19<sup>+</sup>; % in total leukocytes; **D**, **G**, and **H**), PD-1<sup>+</sup> T cells (CD45<sup>+</sup>CD3<sup>+</sup>PD-1<sup>+</sup>; % in total T cells; **I–K**), and PD-1<sup>+</sup> B cells (CD45<sup>+</sup>CD19<sup>+</sup>PD-1<sup>+</sup>; % in total cells; **L–N**) in two periaortic lymph nodes in 11–13-month-old male C57BL/6J mice with splenectomy (splx) or sham operation four weeks after Aldo-salt administration (n = 4–7/group). One symbol in the figures represents the cells of one mouse's two periaortic lymph nodes. The data were expressed as mean  $\pm$  SEM and analyzed by a two-tailed unpaired *t*-test. \*, *P* < 0.05; \*\*, *P* < 0.01; ns, not significant.

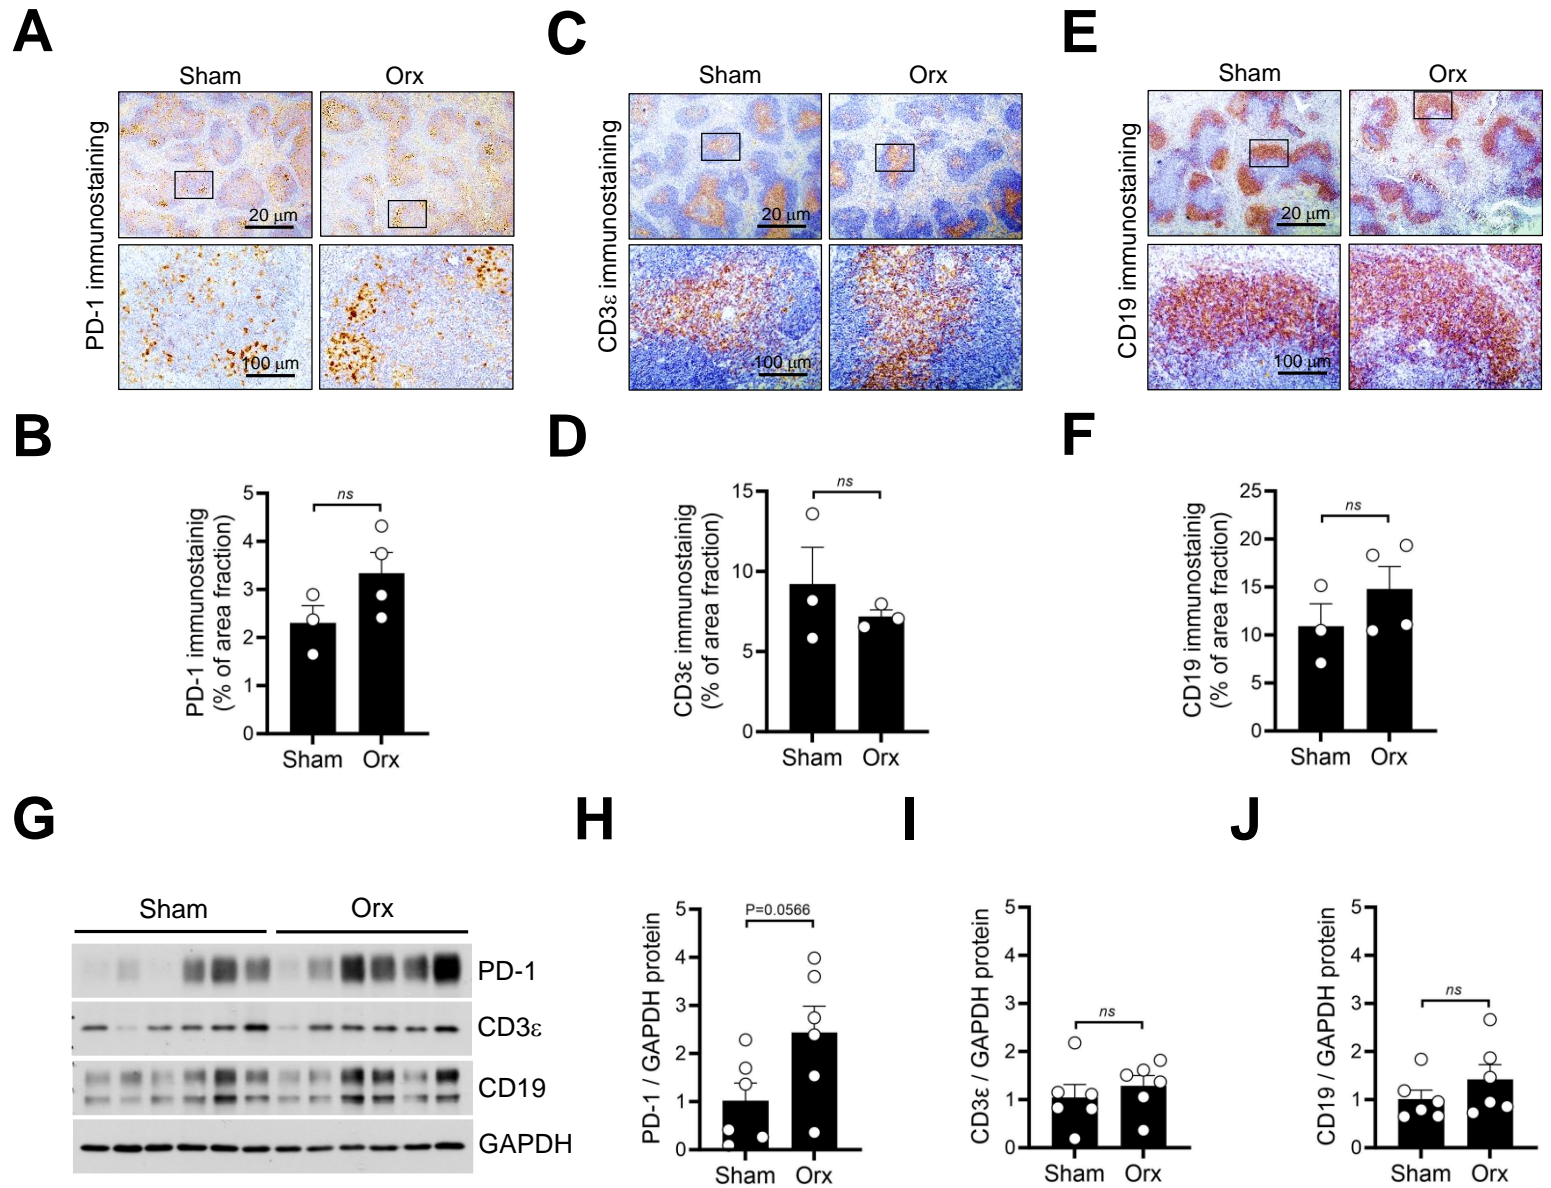

**Supplemental Figure 23. Effects of gonadal androgen deprivation on PD-1, CD3, and CD19 protein levels in the spleen in mice without Aldo-salt administration. (A–F)** Representative immunostainings and quantitative data of PD-1, CD3ε, and CD19 protein expression in the spleens from 10-month-old C57BL/6J mice with orx or sham operation but without Aldo-salt administration ( $n = 3-4/\text{group}$ ). The percentage of areas fraction = (positive area / area of fields of view)  $\times$  100%. The data were calculated from five fields of view randomly photographed per splenic section per mouse. **(G–J)** Representative Western blots and quantitative data of PD-1, CD3ε, CD19, and GAPDH protein expression in the spleens from 10-month-old male mice with orx or sham operation but without Aldo-salt administration ( $n = 6/\text{group}$ ). The data were expressed as mean  $\pm$  SEM and analyzed by a two-tailed unpaired *t*-test. *ns*, not significant.

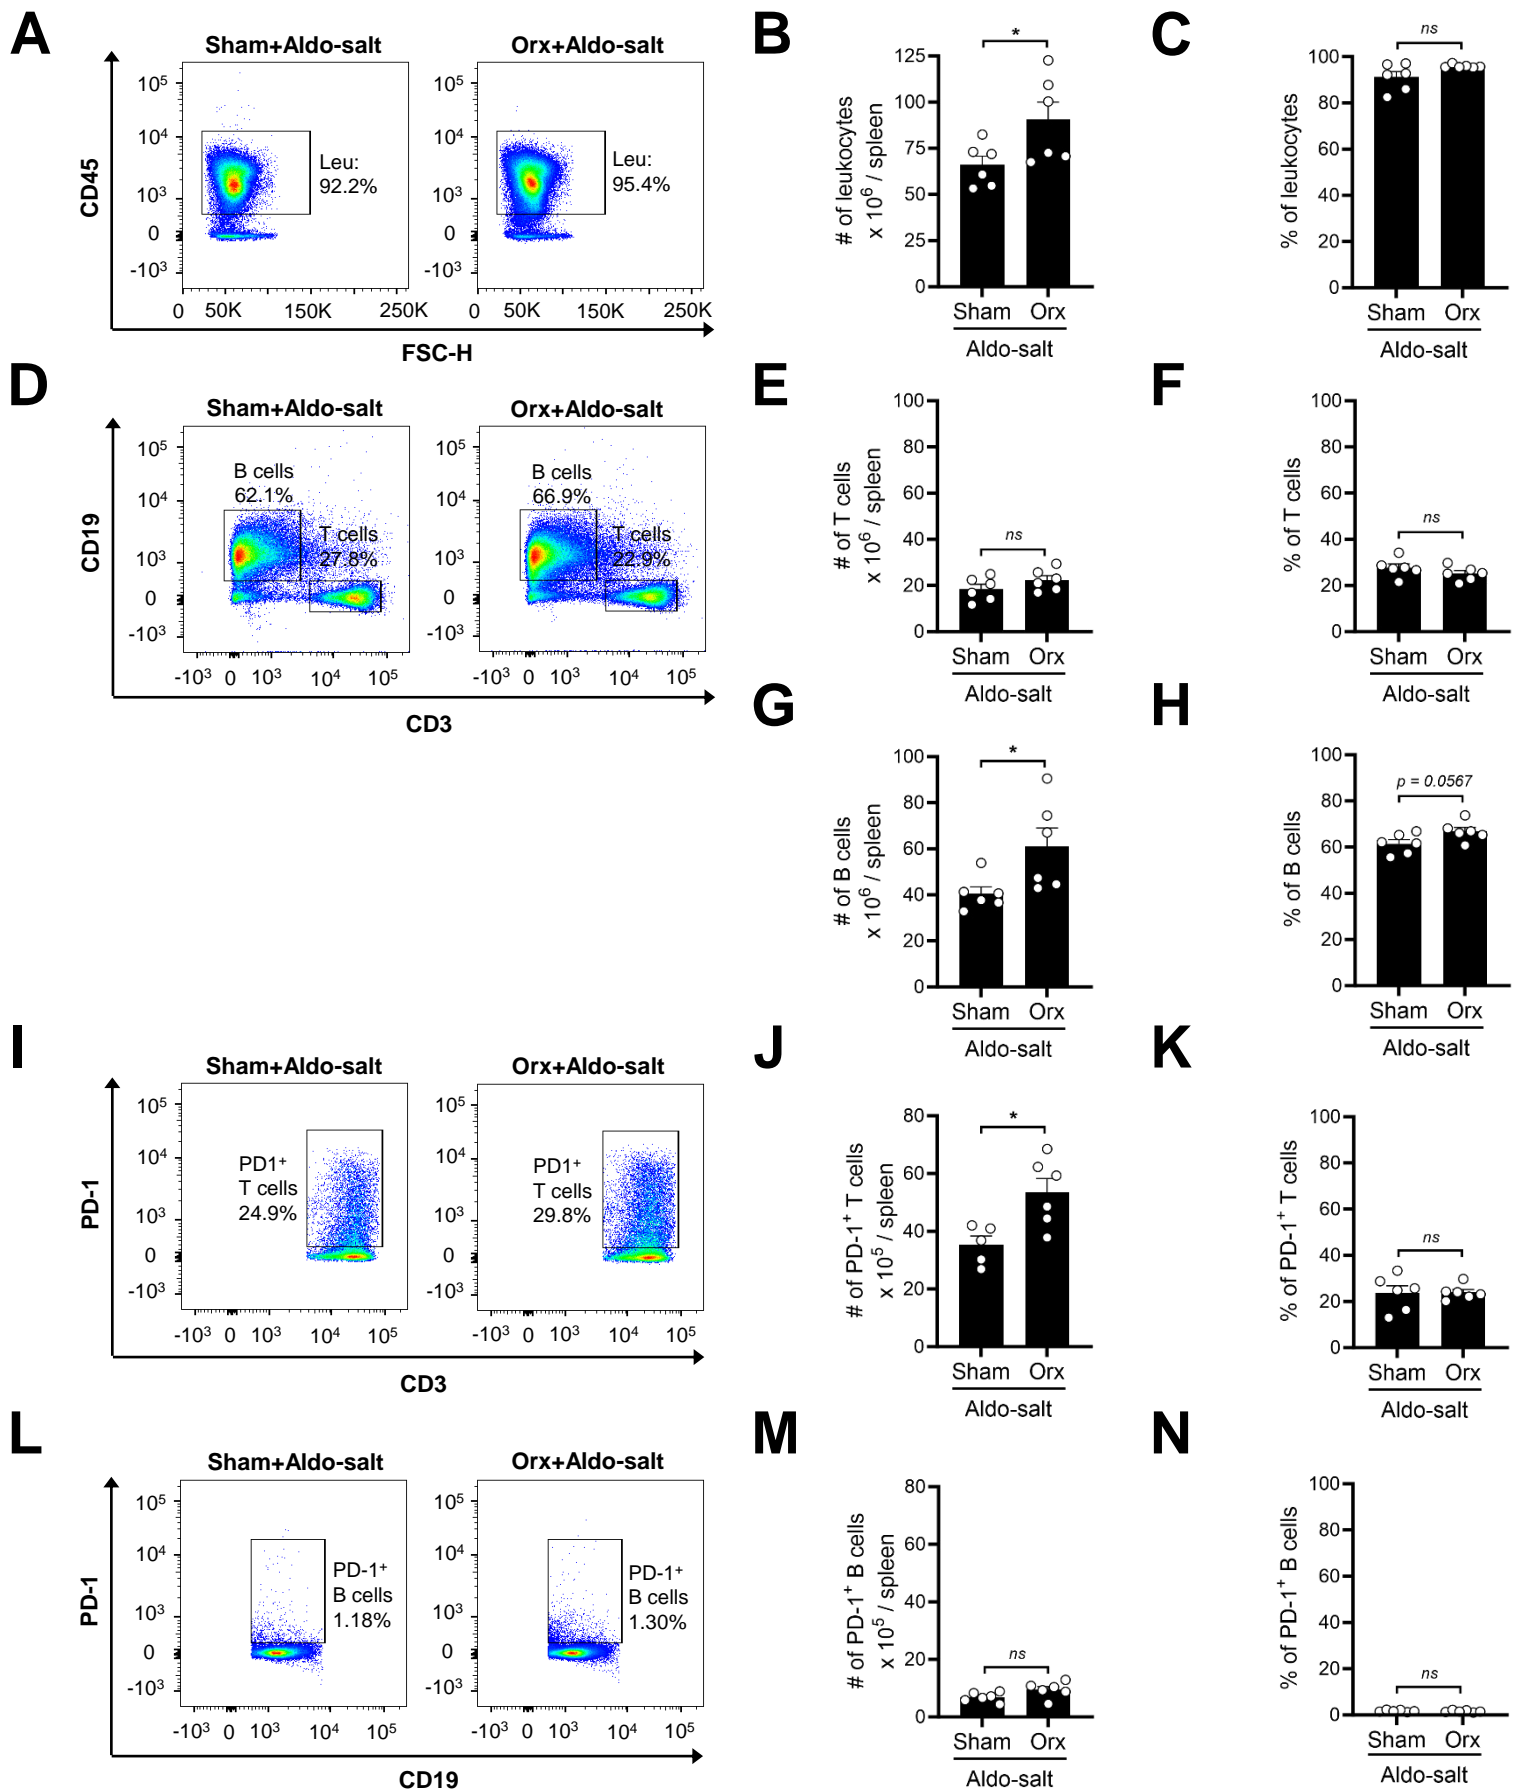

**Supplemental Figure 24. Gonadal androgen deprivation increases the PD-1<sup>+</sup> T cells but not PD-1<sup>+</sup> B cells in the spleen in mice administered Aldo-salt.** Representative pseudocolor plots and quantitative data of flow cytometry analysis of the total numbers (#) and percentage (%) of leukocytes (Leu; CD45<sup>+</sup>; % in total splenic cells; **A–C**), T cells (CD45<sup>+</sup>CD3<sup>+</sup>; % in total leu; **D–F**), B cells (CD45<sup>+</sup>CD19<sup>+</sup>; % in total leu; **D, G**, and **H**), PD-1<sup>+</sup> T cells (CD45<sup>+</sup>CD3<sup>+</sup>PD-1<sup>+</sup>; % in total T cells; **I–K**), and PD-1<sup>+</sup> B cells (CD45<sup>+</sup>CD19<sup>+</sup>PD-1<sup>+</sup>; % in total B cells; **L–N**) in the spleen from 10-month-old male C57BL/6J mice with orx or sham-operation ten days after Aldo-salt administration (n = 5-6/group). The data were expressed as mean  $\pm$  SEM and analyzed by a two-tailed unpaired *t*-test. \*, *P* < 0.05; ns, not significant.



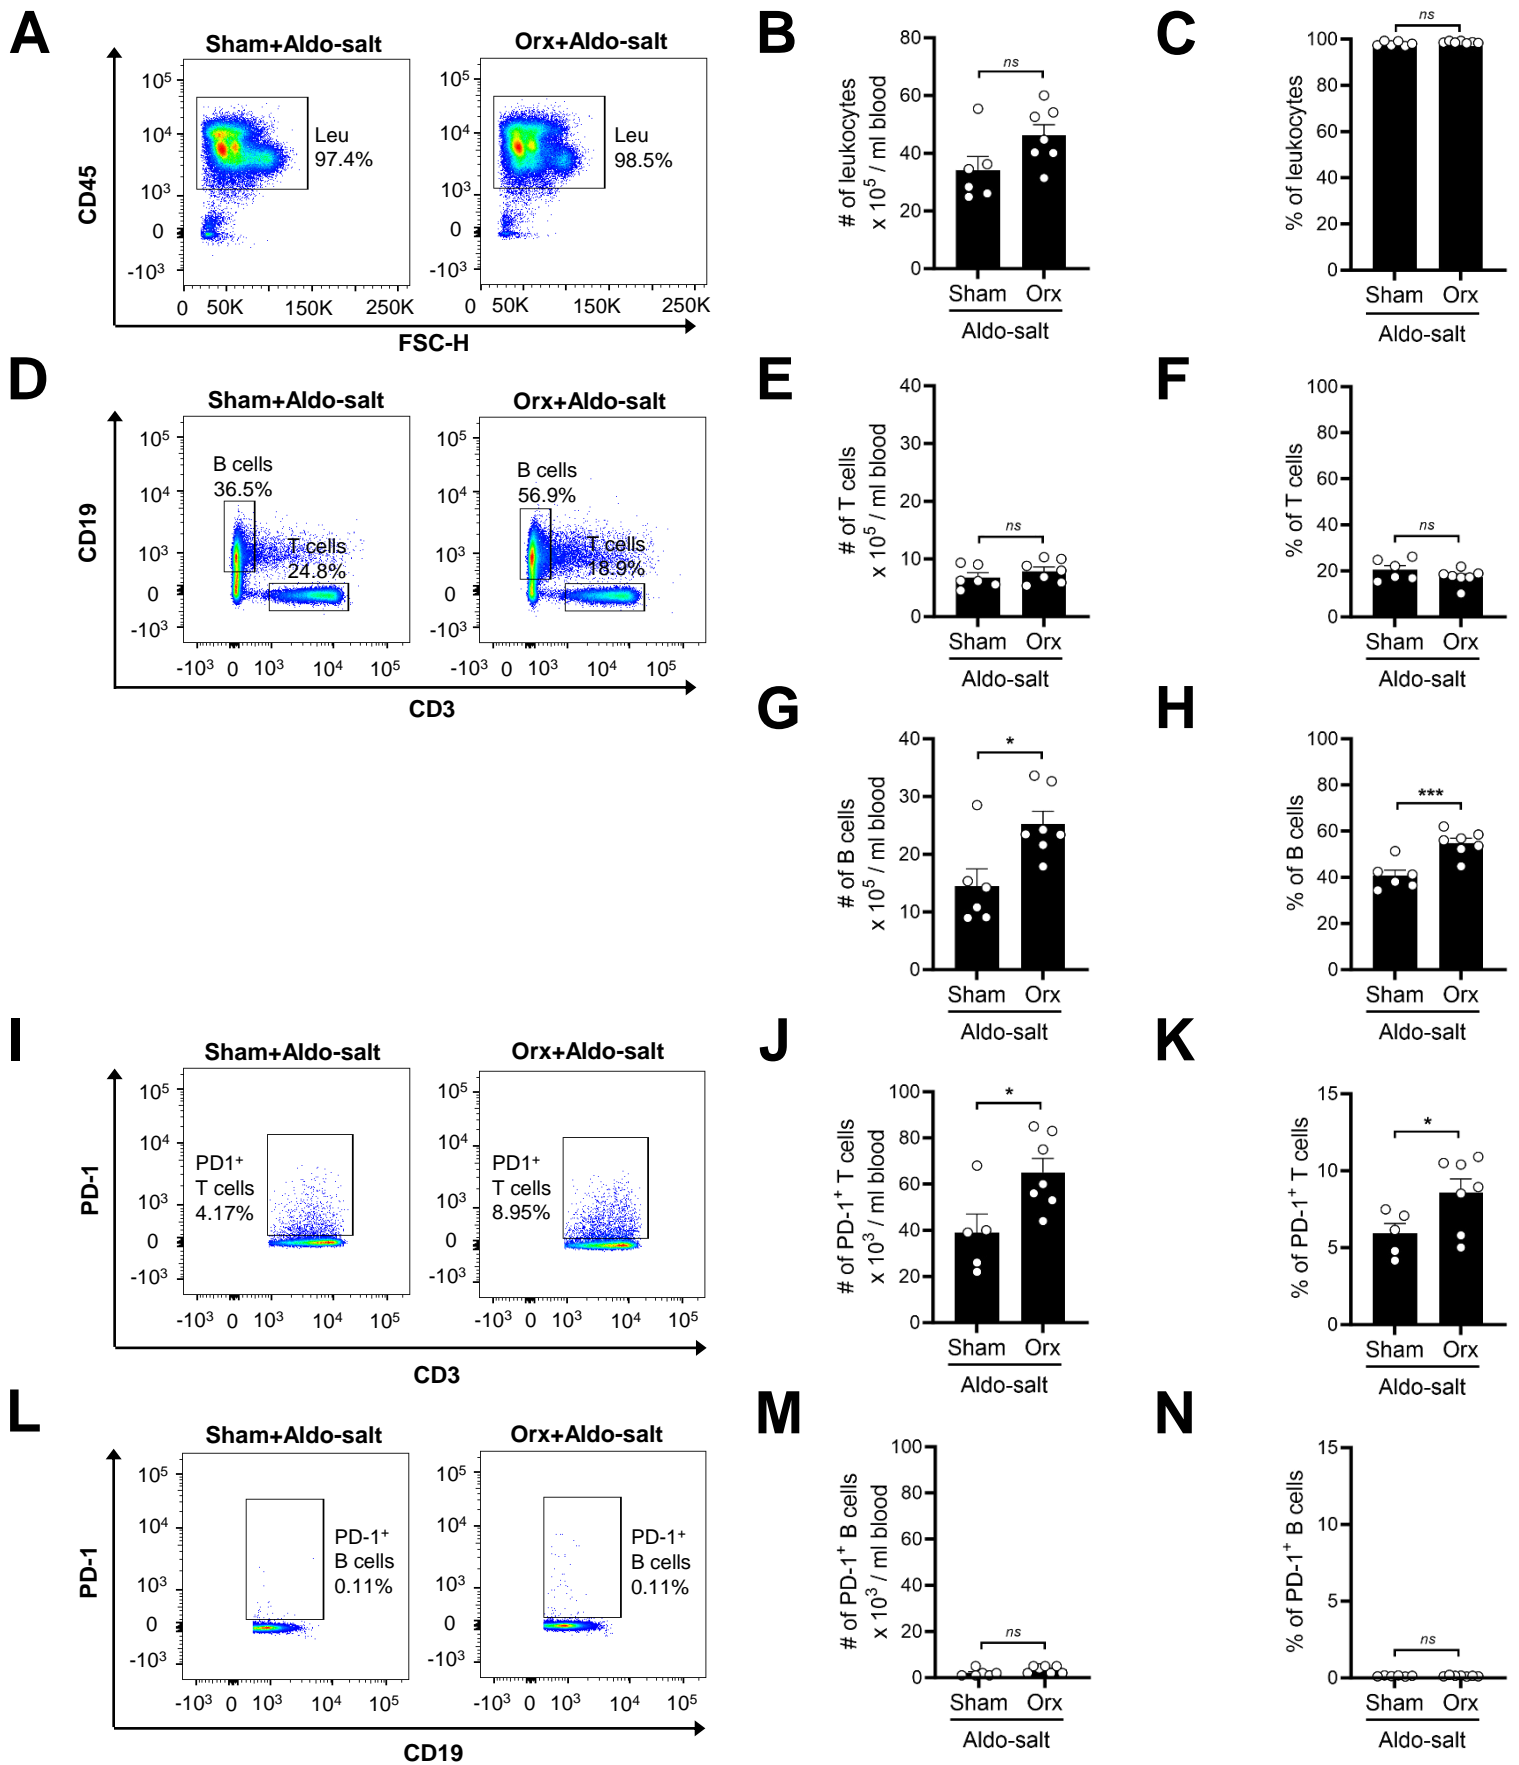

**Supplemental Figure 25. Gonadal androgen deprivation augments PD-1<sup>+</sup> T cells but not PD-1<sup>+</sup> B cells in the blood in mice administered Aldo-salt.** Representative pseudocolor plots and quantitative data of the flow cytometry analysis of the total numbers (#) and percentage (%) of leukocytes (Leu; CD45<sup>+</sup>; % in total blood cells; **A–C**), T cells (CD45<sup>+</sup>CD3<sup>+</sup>; % in total leu; **D–F**), B cells (CD45<sup>+</sup>CD19<sup>+</sup>; % in total leu; **D, G**, and **H**), PD-1<sup>+</sup> T cells (CD45<sup>+</sup>CD3<sup>+</sup>PD-1<sup>+</sup>; % in total T cells; **I–K**) and PD-1<sup>+</sup> B cells (CD45<sup>+</sup>CD19<sup>+</sup>PD-1<sup>+</sup>; % in total B cells; **L–N**) in the blood from 10-month-old male C57BL/6J mice with orx or sham-operation ten days after Aldo-salt administration (n = 6-7/group). The data were expressed as mean  $\pm$  SEM and analyzed by a two-tailed unpaired *t*-test. \*, *P* < 0.05; \*\*\*, *P* < 0.001; ns, not significant.

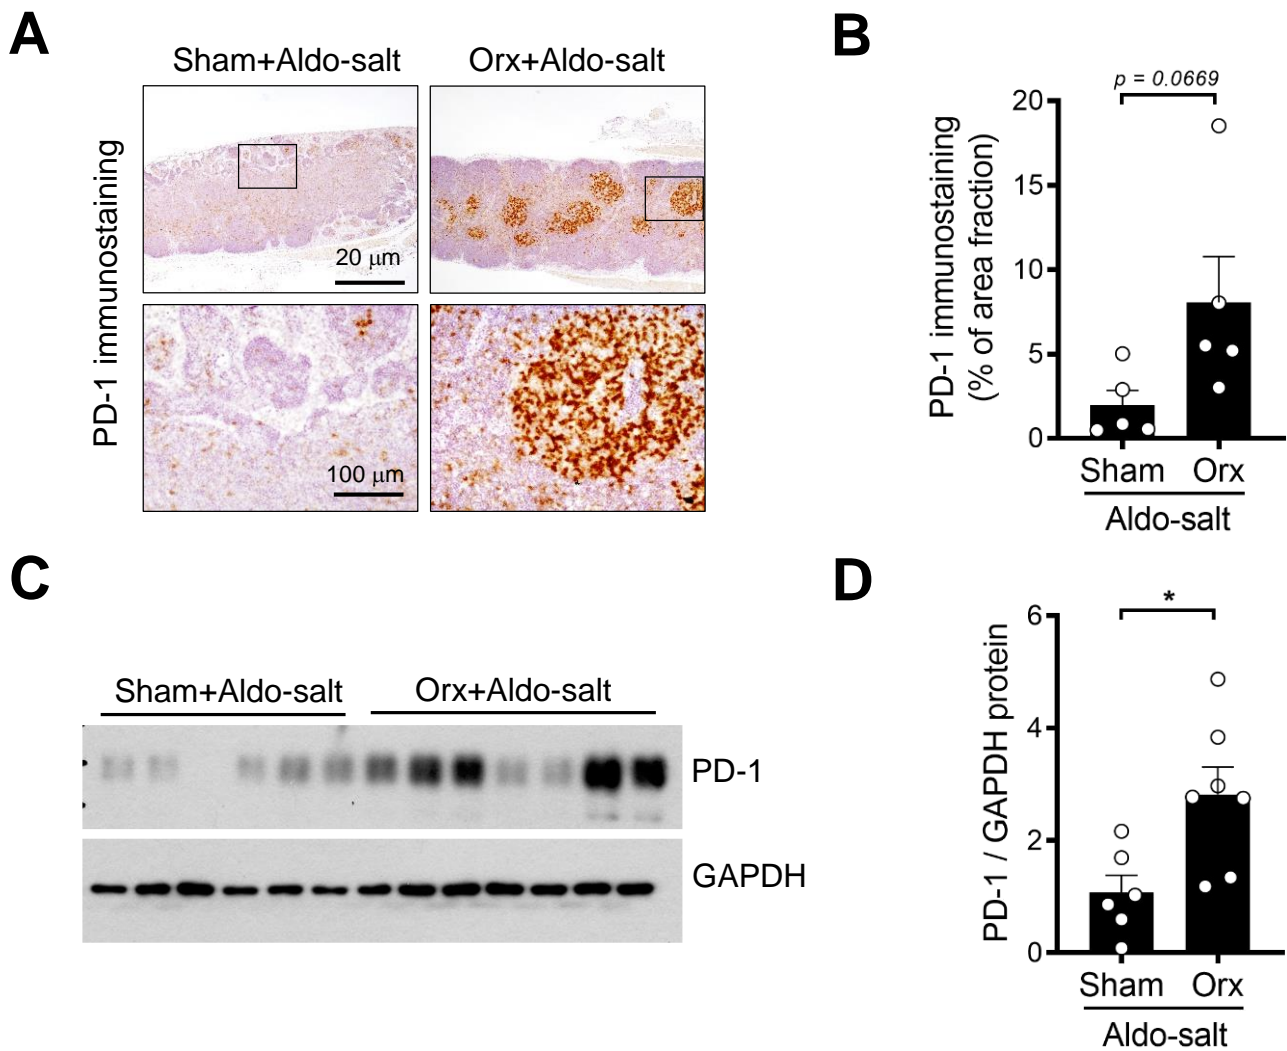

**Supplemental Figure 26. Effects of gonadal androgen deprivation on PD-1 protein expression in the periaortic lymph nodes in mice administered with Aldo-salt. (A and B)** Representative immunostaining (A) and quantitative data (B) of PD-1 protein expression in the periaortic lymph nodes from 10-month-old male C57BL/6J mice with orx and sham operation ten days after Aldo-salt administration ( $n = 5/\text{group}$ ). (C and D) Representative Western blots (C) and quantitative data (D) of PD-1 protein expression in the periaortic lymph nodes from 10-month-old male C57BL/6J mice with orx and sham-operated ten days after Aldo-salt administration ( $n = 6-7/\text{group}$ ). PD-1 protein expressions were normalized to GAPDH. The data were expressed as mean  $\pm$  SEM and analyzed by a two-tailed unpaired  $t$ -test. \*,  $P < 0.05$ .

**A**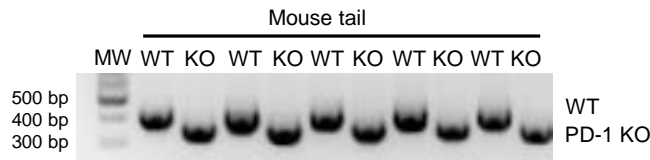**B**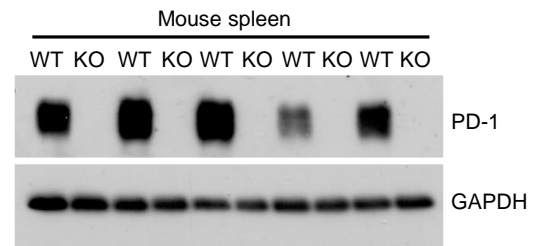**C**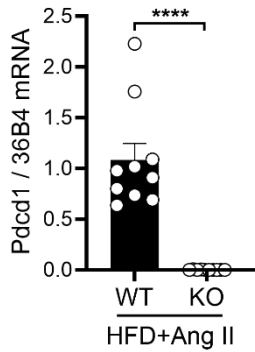**D**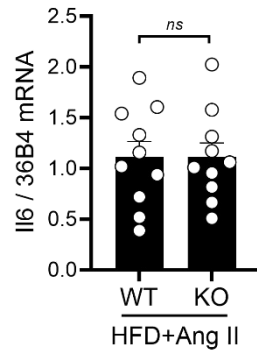**E**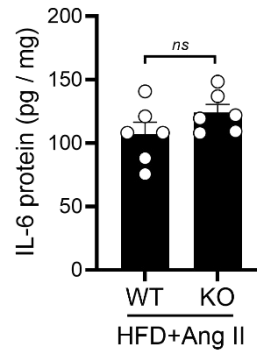**F**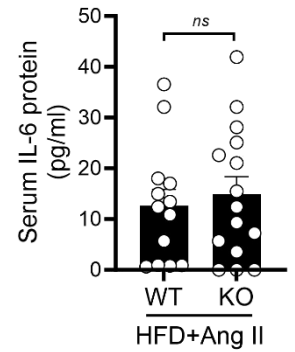

**Supplemental Figure 27. Genetic deletion of PD-1 did not affect IL-6 mRNA and protein expressions in the spleen and serum in mice administered high-fat diet and Ang II.** (A and B) PCR genotyping (A) and Western blots of PD-1 protein expression in the spleens (B) in PD-1 KO and WT male C57BL/6J mice. (C and D) PD-1 ( Pcd1; C) and IL-6 (Il6; D) mRNA expressions were determined by real-time PCR in the spleen in 4-month-old male PD-1 KO and WT male mice with 8-week high-fat diet (HFD) feeding and 4-week Ang II infusion (HFD+Ang II; n = 10/group). (E and F) IL-6 protein expression was determined by ELISA in the spleen (E; n = 6/group) and serum (F; n = 11-12/group) of the same 4-month-old male PD-1 KO and WT mice with HFD+Ang II administration. The data were expressed as mean  $\pm$  SEM and analyzed by a two-tailed unpaired t-test. \*\*\*\*,  $P < 0.0001$ . ns, not significant.

**A**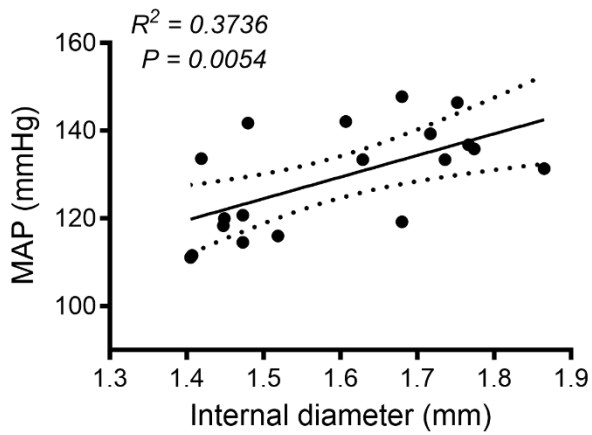**B**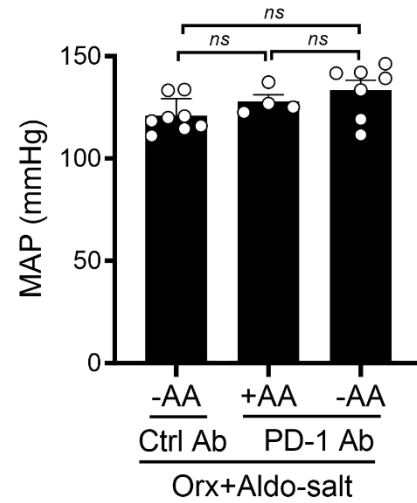

**Supplemental Figure 28. Blood pressure, internal diameters of the aortic arch, and aortic aneurysms in orchietomized mice administered Aldo-salt and anti-PD-1 or control antibodies.** (A) Correlation analysis of the internal diameter of the ArchAo and MAP in orchietomized 10-month-old male C57BL/6J mice seven weeks after Aldo-salt and anti-PD-1 or control Ab administration ( $n = 19/\text{group}$ ). (B) MAP in orchietomized 10-month-old male C57BL/6J mice administered Aldo-salt with anti-PD-1 or control Ab and with (+) or without (-) aortic aneurysms ( $n = 4-8/\text{group}$ ). The data were expressed as mean  $\pm$  SEM and analyzed by simple linear regression analysis (A) and one-way ANOVA for multiple comparison tests (B). *ns*, not statistically significant.

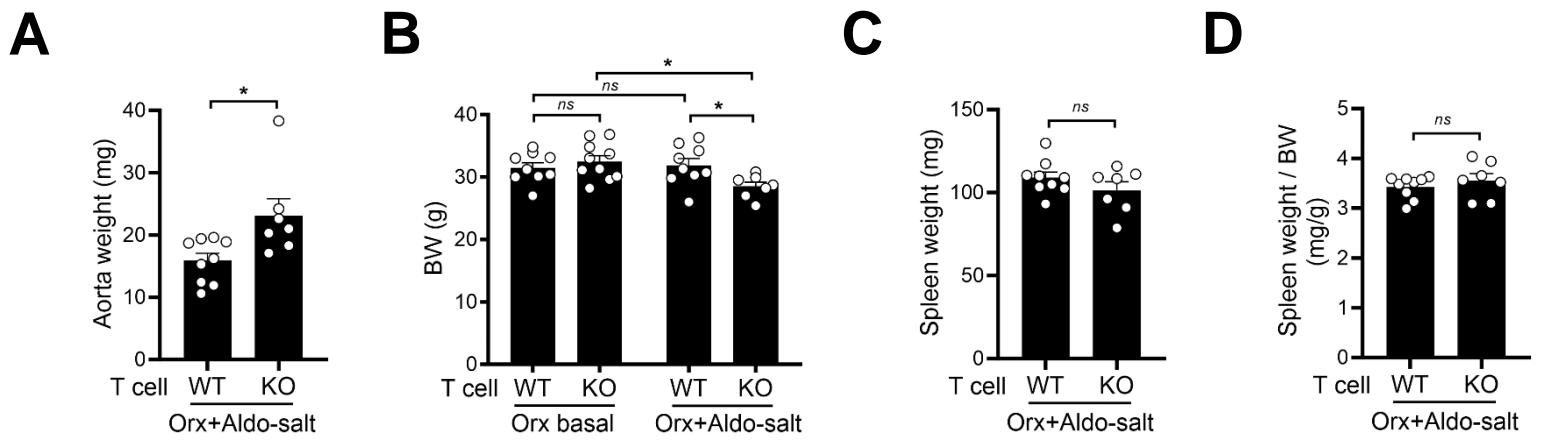

**Supplemental Figure 29. The effect of adoptive PD-1 deficient T cell transfer on aorta weight, body weight, and spleen weight in orchietomized mice administered Aldo-salt.** Aorta weight (**A**;  $n = 7-9/\text{group}$ ), BW (**B**;  $n = 7-10/\text{group}$ ), spleen weight (**C**;  $n = 7-9/\text{group}$ ), and the ratio of spleen weight to BW (**D**;  $n = 7-9/\text{group}$ ) in 9-10-month-old orchietomized C57BL/6J male mice four weeks after Aldo-salt with adoptive PD-1 KO and WT T cell transfer via retro-orbital sinus injection two days before and eight and eighteen days after Aldo-salt administration. PD-1 KO and WT T cells were isolated from 4-5-month-old male PD-1 KO and WT C57BL6J mice. The data were expressed as mean  $\pm$  SEM and analyzed by unpaired two-tailed  $t$ -test (**A**, **C**, and **D**) and two-way ANOVA with multiple comparison tests (**B**) and \*,  $p < 0.05$ ; \*\*\*\*,  $p < 0.0001$ ; ns, not significant.

**A**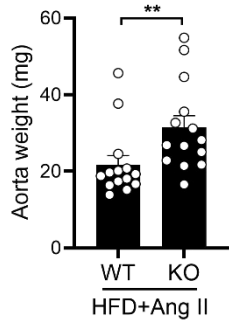**B**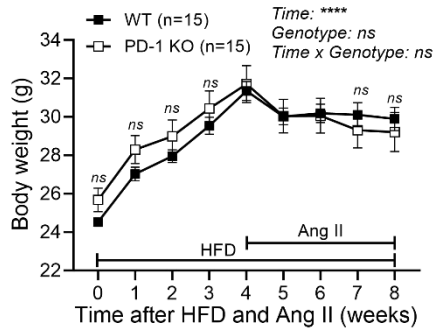**C**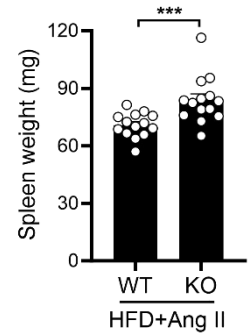**D**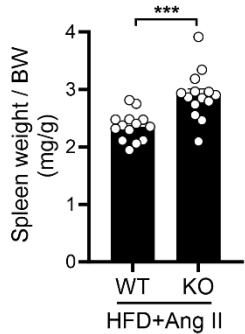**E**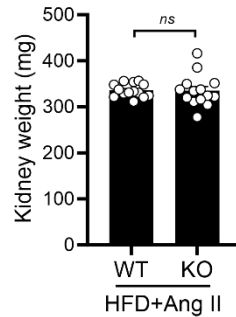**F**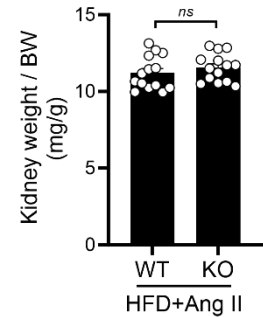

**Supplemental Figure 30. The effects of genetic deletion of PD-1 on aorta weight, body weight, spleen weight, and kidney weight in mice administered high-fat diet and angiotensin II.** The aorta weight (**A**;  $n = 14/\text{group}$ ), BW (**B**;  $n = 15/\text{group}$ ), spleen weight (**C**;  $n = 14/\text{group}$ ), the ratio of spleen weight to BW (**D**;  $n = 14/\text{group}$ ), kidney weight (**E**;  $n = 14/\text{group}$ ), and ratio of kidney weight to BW (**F**;  $n = 14/\text{group}$ ) in 4-month-old male PD-1 knockout (PD-1 KO) and wild-type (WT) C57BL/6J mice with 8-week HFD feeding 4-week Ang II infusion. The data were expressed as mean  $\pm$  SEM and analyzed by unpaired two-tailed  $t$ -test (**A** and **C-F**) and two-way ANOVA with multiple comparison tests (**B**) and \*\*\*,  $p < 0.001$ ; \*\*\*\*,  $p < 0.0001$ ; ns, not significant.

**Supplemental Table 1. A complete list of 180 genes whose mRNAs are upregulated by orchietomy (Orx vs. Sham Ctrl) but downregulated by exogenous dihydrotestosterone (DHT) administration to orchietomized mice (Orx+DHT vs. Orx) in the aorta in mice administered Aldo-salt**

| #  | Gene ID   | Description                                                     | Location | Fold Change (Orx vs. Ctrl) | P-value    | Fold Change (Orx+DHT vs. Orx) | P-value    |
|----|-----------|-----------------------------------------------------------------|----------|----------------------------|------------|-------------------------------|------------|
| 1  | Krt17     | keratin 17                                                      | chr11    | 72.56                      | 0.00293234 | -93.23                        | 0.00515206 |
| 2  | Alb       | albumin                                                         | chr5     | 66.33                      | 0.0000639  | -11.24                        | 0.00140744 |
| 3  | Tbata     | thymus, brain and testes associated                             | chr10    | 53.87                      | 0.00035045 | -28.29                        | 0.00098214 |
| 4  | Hamp2     | hepcidin antimicrobial peptide 2                                | chr7     | 39.67                      | 0.00003697 | -23.43                        | 0.00045217 |
| 5  | Camp      | cathelicidin antimicrobial peptide                              | chr9     | 23.37                      | 0.00009690 | -4.54                         | 0.00397801 |
| 6  | Ngp       | neutrophilic granule protein                                    | chr9     | 20.00                      | 0.00000009 | -6.09                         | 0.00006854 |
| 7  | S100a8    | S100 calcium binding protein A8 (calgranulin A)                 | chr3     | 13.36                      | 0.00000001 | -3.40                         | 0.00378026 |
| 8  | H2-Eb2    | histocompatibility 2, class II antigen E beta2                  | chr17    | 12.48                      | 0.00020575 | -10.62                        | 0.00301283 |
| 9  | Themis    | thymocyte selection associated                                  | chr10    | 12.16                      | 0.00429165 | -18.45                        | 0.00022233 |
| 10 | S100a9    | S100 calcium binding protein A9 (calgranulin B)                 | chr3     | 11.99                      | 0.00000000 | -3.20                         | 0.00339268 |
| 11 | Myb       | myeloblastosis oncogene                                         | chr10    | 10.97                      | 0.00009978 | -17.17                        | 0.00000386 |
| 12 | Cr2       | complement receptor 2                                           | chr1     | 10.59                      | 0.00073704 | -14.30                        | 0.00047904 |
| 13 | Cd79a     | CD79A antigen                                                   | chr7     | 10.49                      | 0.00000089 | -8.41                         | 0.00005525 |
| 14 | Ms4a1     | membrane-spanning 4-domains A1                                  | chr19    | 10.47                      | 0.00000850 | -18.94                        | 0.00000015 |
| 15 | Cd19      | CD19 antigen                                                    | chr7     | 10.22                      | 0.00000678 | -10.85                        | 0.00001361 |
| 16 | Sh2d1a    | SH2 domain containing 1A                                        | chrX     | 9.42                       | 0.00433350 | -17.30                        | 0.00136215 |
| 17 | Tnfrsf13c | TNF receptor superfamily member 13c                             | chr15    | 9.40                       | 0.00022008 | -8.35                         | 0.00058788 |
| 18 | Mzb1      | marginal zone B and B1 cell-specific protein 1                  | chr18    | 9.10                       | 0.00007934 | -10.04                        | 0.00012146 |
| 19 | Fcgr      | Fc fragment of IgM receptor                                     | chr1     | 9.06                       | 0.00055230 | -9.07                         | 0.00033054 |
| 20 | Prg2      | proteoglycan 2, bone marrow                                     | chr2     | 8.97                       | 0.00009111 | -8.38                         | 0.00008549 |
| 21 | Cd8b1     | CD8 antigen, beta chain 1                                       | chr6     | 8.79                       | 0.00000930 | -11.39                        | 0.00000187 |
| 22 | Bcl11a    | B cell CLL/lymphoma 11A                                         | chr11    | 8.78                       | 0.00011468 | -12.34                        | 0.00004661 |
| 23 | Gfi1      | growth factor independent 1 transcription repressor             | chr5     | 8.54                       | 0.00072452 | -4.90                         | 0.00809827 |
| 24 | Sid1      | SID1 transmembrane family member 1                              | chr16    | 8.49                       | 0.00140464 | -11.35                        | 0.00184782 |
| 25 | Cacna1e   | calcium voltage-gated channel subunit alpha1 E                  | chr1     | 8.38                       | 0.00018835 | -5.63                         | 0.00415678 |
| 26 | Cxcr5     | chemokine (C-X-C motif) receptor 5                              | chr9     | 8.36                       | 0.00008848 | -10.71                        | 0.00009679 |
| 27 | Cd79b     | CD79B antigen                                                   | chr11    | 8.28                       | 0.00000775 | -7.62                         | 0.00002434 |
| 28 | Spib      | Spi-B transcription factor                                      | chr7     | 8.21                       | 0.00012726 | -17.88                        | 0.00000381 |
| 29 | Cd8a      | CD8 antigen, alpha chain                                        | chr6     | 8.18                       | 0.00007024 | -14.10                        | 0.00000312 |
| 30 | Gimap7    | GTPase, IMAP family member 7                                    | chr6     | 7.92                       | 0.00242371 | -6.81                         | 0.00635858 |
| 31 | Pax5      | paired box 5                                                    | chr4     | 7.79                       | 0.00042815 | -7.91                         | 0.00004445 |
| 32 | Siglecg   | sialic acid binding Ig-like lectin G                            | chr7     | 7.76                       | 0.00059477 | -9.95                         | 0.00010210 |
| 33 | Ly6d      | lymphocyte antigen 6 complex, locus D                           | chr15    | 7.74                       | 0.00002771 | -8.43                         | 0.00001140 |
| 34 | Cd22      | CD22 antigen                                                    | chr7     | 7.66                       | 0.00036876 | -7.85                         | 0.00021901 |
| 35 | Txk       | TXK tyrosine kinase                                             | chr5     | 7.58                       | 0.00406763 | -15.63                        | 0.00131832 |
| 36 | Fcrla     | Fc receptor-like A                                              | chr1     | 7.31                       | 0.00058840 | -9.12                         | 0.00026021 |
| 37 | Pou2af1   | POU class 2 homeobox associating factor 1                       | chr9     | 6.47                       | 0.00070169 | -9.62                         | 0.00001364 |
| 38 | Ltb       | lymphotoxin B                                                   | chr17    | 6.32                       | 0.00005346 | -5.68                         | 0.00022554 |
| 39 | Fcrl1     | Fc receptor-like 1                                              | chr3     | 6.30                       | 0.00640415 | -8.28                         | 0.00467074 |
| 40 | Ms4a4b    | membrane-spanning 4-domains, subfamily A, 4B                    | chr19    | 6.25                       | 0.00054053 | -8.63                         | 0.00030896 |
| 41 | Bcl11b    | B cell leukemia/lymphoma 11B                                    | chr12    | 6.20                       | 0.00022008 | -17.37                        | 0.00000158 |
| 42 | H2-Oa     | histocompatibility 2, O region alpha locus                      | chr17    | 6.18                       | 0.00530697 | -15.90                        | 0.00057125 |
| 43 | Ly6c2     | lymphocyte antigen 6 complex, locus C2                          | chr15    | 6.00                       | 0.00048563 | -5.97                         | 0.00008967 |
| 44 | Slamf6    | SLAM family member 6                                            | chr1     | 5.99                       | 0.00844321 | -7.29                         | 0.00744750 |
| 45 | Cd27      | CD27 antigen                                                    | chr6     | 5.94                       | 0.00088574 | -6.77                         | 0.00219890 |
| 46 | Cd5       | CD5 antigen                                                     | chr19    | 5.83                       | 0.00000845 | -2.99                         | 0.00188554 |
| 47 | Gjb2      | gap junction protein, beta 2                                    | chr14    | 5.62                       | 0.00822289 | -8.75                         | 0.00898610 |
| 48 | H2-Ob     | histocompatibility 2, O region beta locus                       | chr17    | 5.52                       | 0.00051984 | -5.94                         | 0.00053131 |
| 49 | Lef1      | lymphoid enhancer binding factor 1                              | chr3     | 5.47                       | 0.00024262 | -5.34                         | 0.00027613 |
| 50 | Ptprcap   | protein tyrosine phosphatase receptor type C associated protein | chr19    | 5.44                       | 0.00016530 | -7.24                         | 0.00002414 |
| 51 | H2-DMb2   | histocompatibility 2, class II, locus Mb2                       | chr17    | 5.36                       | 0.00006367 | -6.08                         | 0.00003221 |
| 52 | Cd69      | CD69 antigen                                                    | chr6     | 5.32                       | 0.00309230 | -4.77                         | 0.00370211 |
| 53 | Cd3g      | CD3 antigen, gamma polypeptide                                  | chr9     | 5.30                       | 0.00000798 | -4.02                         | 0.00040940 |
| 54 | Bcl2a1d   | B cell leukemia/lymphoma 2 related protein A1d                  | chr9     | 5.25                       | 0.00053813 | -8.40                         | 0.00013498 |
| 55 | Sell      | selectin, lymphocyte                                            | chr1     | 5.20                       | 0.00121179 | -6.00                         | 0.00015825 |
| 56 | Lck       | lymphocyte protein tyrosine kinase                              | chr1     | 5.11                       | 0.00053414 | -6.87                         | 0.00003226 |
| 57 | Tcf7      | transcription factor 7, T cell specific                         | chr11    | 4.90                       | 0.00015294 | -8.26                         | 0.00000127 |
| 58 | Trem1     | triggering receptor expressed on myeloid cells-like 4           | chr17    | 4.84                       | 0.00605111 | -4.78                         | 0.00891611 |
| 59 | Card11    | caspase recruitment domain family, member 11                    | chr5     | 4.77                       | 0.00022641 | -9.47                         | 0.00001543 |
| 60 | Itk       | IL2 inducible T cell kinase                                     | chr11    | 4.66                       | 0.00077488 | -10.58                        | 0.00000563 |
| 61 | Azgp1     | alpha-2-glycoprotein 1, zinc                                    | chr5     | 4.58                       | 0.00226445 | -13.71                        | 0.00006137 |
| 62 | Traf3ip3  | TRAF3 interacting protein 3                                     | chr1     | 4.57                       | 0.00122313 | -9.23                         | 0.00001125 |
| 63 | Col11a1   | collagen, type XI, alpha 1                                      | chr3     | 4.53                       | 0.00386393 | -4.11                         | 0.00926047 |
| 64 | Prss35    | protease, serine 35                                             | chr9     | 4.47                       | 0.00552033 | -4.64                         | 0.00871472 |
| 65 | Il18r1    | interleukin 18 receptor 1                                       | chr1     | 4.47                       | 0.00633410 | -13.41                        | 0.00002101 |
| 66 | Btla      | B and T lymphocyte associated                                   | chr16    | 4.46                       | 0.00219236 | -5.82                         | 0.00069288 |
| 67 | Ikaros    | IKAROS family zinc finger 3                                     | chr11    | 4.42                       | 0.00042893 | -11.40                        | 0.00000050 |
| 68 | Cd3d      | CD3 antigen, delta polypeptide                                  | chr9     | 4.34                       | 0.00091830 | -5.79                         | 0.00041619 |
| 69 | Cytip     | cytohesin 1 interacting protein                                 | chr2     | 4.27                       | 0.00125618 | -6.67                         | 0.00003467 |
| 70 | Blk       | B lymphoid kinase                                               | chr14    | 4.27                       | 0.00543365 | -5.22                         | 0.00050444 |

**Supplemental Table 1 (continued). A complete list of 180 genes whose mRNAs are upregulated by orchietomy (Orx vs. Sham Ctrl) but downregulated by exogenous dihydrotestosterone (DHT) administration to orchietomized mice (Orx+DHT vs. Orx) in the aorta in mice administered Aldo-salt**

| #   | Gene ID  | Description                                              | Location | Fold Change (Orx vs. Ctrl) | P-value    | Fold Change (Orx+DHT vs. Orx) | P-value    |
|-----|----------|----------------------------------------------------------|----------|----------------------------|------------|-------------------------------|------------|
| 71  | Rnase6   | ribonuclease, RNase A family, 6                          | chr14    | 4.25                       | 0.00062204 | -3.62                         | 0.00697734 |
| 72  | Rasal3   | RAS protein activator like 3                             | chr17    | 4.18                       | 0.00026567 | -5.66                         | 0.00009229 |
| 73  | Tcf21    | transcription factor 21                                  | chr10    | 4.15                       | 0.00359346 | -6.98                         | 0.00028077 |
| 74  | Cd28     | CD28 antigen                                             | chr1     | 4.10                       | 0.00487485 | -11.30                        | 0.00015504 |
| 75  | Acap1    | ArfGAP with coiled-coil, ankyrin repeat and PH domains 1 | Chr11    | 4.04                       | 0.00049392 | -3.99                         | 0.00106126 |
| 76  | Itgax    | integrin alpha X                                         | Chr7     | 3.91                       | 0.00021341 | -7.78                         | 0.00000025 |
| 77  | Fcho1    | FCH domain only 1                                        | chr8     | 3.77                       | 0.00028312 | -5.48                         | 0.00004304 |
| 78  | Tbc1d10c | TBC1 domain family, member 10c                           | chr19    | 3.72                       | 0.00335201 | -6.03                         | 0.00014369 |
| 79  | Ipcef1   | interaction protein for cytohesin exchange factors 1     | chr10    | 3.72                       | 0.00063026 | -4.62                         | 0.00033393 |
| 80  | Cdca7    | cell division cycle associated 7                         | chr2     | 3.64                       | 0.00219618 | -4.19                         | 0.00117219 |
| 81  | Rhbg     | Rhesus blood group-associated B glycoprotein             | chr3     | 3.61                       | 0.00461591 | -3.67                         | 0.00831695 |
| 82  | Grap2    | GRB2-related adaptor protein 2                           | chr15    | 3.59                       | 0.00042164 | -4.61                         | 0.00008908 |
| 83  | P2ry10   | purinergic receptor P2Y, G-protein coupled 10            | chrX     | 3.59                       | 0.00518994 | -8.35                         | 0.00006476 |
| 84  | Cd3e     | CD3 antigen, epsilon polypeptide                         | chr9     | 3.57                       | 0.00107340 | -5.39                         | 0.00080476 |
| 85  | Map4k1   | mitogen-activated protein kinase kinase kinase 1         | chr7     | 3.46                       | 0.00065314 | -3.55                         | 0.00033196 |
| 86  | Gimap3   | GTPase, IMAP family member 3                             | chr6     | 3.46                       | 0.00052659 | -3.27                         | 0.00106921 |
| 87  | Itgal    | integrin alpha L                                         | chr7     | 3.39                       | 0.00065878 | -5.42                         | 0.00000829 |
| 88  | Parvg    | parvin, gamma                                            | chr15    | 3.30                       | 0.00275671 | -3.46                         | 0.00086344 |
| 89  | Rasgrp1  | RAS guanyl releasing protein 1                           | chr2     | 3.26                       | 0.00013955 | -6.18                         | 0.00000003 |
| 90  | Lat      | linker for activation of T cells                         | chr7     | 3.25                       | 0.00028462 | -4.26                         | 0.00003633 |
| 91  | Ptpn22   | protein tyrosine phosphatase, non-receptor type 22       | chr3     | 3.25                       | 0.00017971 | -5.64                         | 0.00000163 |
| 92  | Gpr141b  | G protein-coupled receptor 141B                          | chr13    | 3.25                       | 0.00714189 | -4.58                         | 0.00272678 |
| 93  | Cd2      | CD2 antigen                                              | chr3     | 3.21                       | 0.00547508 | -3.89                         | 0.00071948 |
| 94  | Skap1    | src family associated phosphoprotein 1                   | chr11    | 3.15                       | 0.00086272 | -5.52                         | 0.00005163 |
| 95  | Unc13d   | unc-13 homolog D                                         | chr11    | 3.12                       | 0.00115720 | -2.97                         | 0.00141585 |
| 96  | Cd52     | CD52 antigen                                             | chr4     | 3.06                       | 0.00053838 | -3.10                         | 0.00054816 |
| 97  | Il7r     | interleukin 7 receptor                                   | chr15    | 3.03                       | 0.00465978 | -5.88                         | 0.00004590 |
| 98  | Cxcr6    | chemokine (C-X-C motif) receptor 6                       | chr9     | 3.00                       | 0.00662081 | -7.99                         | 0.00000974 |
| 99  | Sla      | src-like adaptor                                         | chr15    | 3.00                       | 0.00031091 | -4.40                         | 0.00000104 |
| 100 | Itgb7    | integrin beta 7                                          | chr15    | 2.90                       | 0.00292785 | -4.49                         | 0.00001454 |
| 101 | Stat4    | signal transducer and activator of transcription 4       | chr1     | 2.86                       | 0.00813945 | -7.63                         | 0.00002618 |
| 102 | Bcl2a1b  | B cell leukemia/lymphoma 2 related protein A1b           | chr9     | 2.84                       | 0.00050359 | -4.53                         | 0.00043336 |
| 103 | Gbp8     | guanylate-binding protein 8                              | chr5     | 2.84                       | 0.00241229 | -6.61                         | 0.00000543 |
| 104 | Nup210   | nucleoporin 210                                          | chr6     | 2.80                       | 0.00257918 | -2.49                         | 0.00690455 |
| 105 | Cd37     | CD37 antigen                                             | chr7     | 2.80                       | 0.00119792 | -3.14                         | 0.00034960 |
| 106 | Rhoh     | ras homolog family member H                              | chr5     | 2.78                       | 0.00255259 | -3.77                         | 0.00029389 |
| 107 | Pmaip1   | phorbol-12-myristate-13-acetate-induced protein 1        | chr18    | 2.77                       | 0.00940216 | -4.14                         | 0.00081350 |
| 108 | Il2rb    | interleukin 2 receptor, beta chain                       | chr15    | 2.56                       | 0.00166477 | -3.37                         | 0.00009137 |
| 109 | Wdfy4    | WD repeat and FYVE domain containing 4                   | chr14    | 2.54                       | 0.00147824 | -4.00                         | 0.00000055 |
| 110 | Il21r    | interleukin 21 receptor                                  | chr7     | 2.52                       | 0.00218437 | -3.53                         | 0.00000894 |
| 111 | Cyp4f18  | cytochrome P450, family 4, subfamily f, polypeptide 18   | chr8     | 2.52                       | 0.00593724 | -3.69                         | 0.00057901 |
| 112 | Ezr      | ezrin                                                    | chr17    | 2.52                       | 0.00921918 | -4.72                         | 0.00001711 |
| 113 | Coro1a   | coronin, actin binding protein 1A                        | chr7     | 2.49                       | 0.00009215 | -2.88                         | 0.00001024 |
| 114 | Cd247    | CD247 antigen                                            | chr1     | 2.49                       | 0.00011772 | -3.17                         | 0.00006881 |
| 115 | Mamdc2   | MAM domain containing 2                                  | chr19    | 2.46                       | 0.00309219 | -2.72                         | 0.00103849 |
| 116 | Blnk     | B cell linker                                            | chr19    | 2.43                       | 0.00651873 | -3.26                         | 0.00042273 |
| 117 | Arl5c    | ADP-ribosylation factor-like 5C                          | chr11    | 2.42                       | 0.00540941 | -2.40                         | 0.00739382 |
| 118 | Sash3    | SAM and SH3 domain containing 3                          | chrX     | 2.38                       | 0.00115611 | -3.04                         | 0.00005892 |
| 119 | Rgs14    | regulator of G-protein signaling 14                      | chr13    | 2.38                       | 0.00720522 | -4.80                         | 0.00003052 |
| 120 | Rac2     | Rac family small GTPase 2                                | chr15    | 2.31                       | 0.00109290 | -2.70                         | 0.00034669 |
| 121 | Irf8     | interferon regulatory factor 8                           | chr8     | 2.31                       | 0.00992903 | -3.21                         | 0.00020599 |
| 122 | H2-DMa   | histocompatibility 2, class II, locus DMa                | chr17    | 2.30                       | 0.00256607 | -2.50                         | 0.00221721 |
| 123 | Ptpcr    | protein tyrosine phosphatase receptor type C             | chr1     | 2.29                       | 0.00466891 | -4.49                         | 0.00000005 |
| 124 | H2-Ab1   | histocompatibility 2, class II antigen A, beta 1         | chr17    | 2.28                       | 0.00279696 | -2.65                         | 0.00038114 |
| 125 | Shisa2   | shisa family member 2                                    | chr14    | 2.28                       | 0.00544805 | -2.51                         | 0.00417194 |
| 126 | Cd74     | CD74 antigen                                             | chr18    | 2.24                       | 0.00281218 | -2.53                         | 0.00042047 |
| 127 | Hvcn1    | hydrogen voltage-gated channel 1                         | chr5     | 2.24                       | 0.00437503 | -2.28                         | 0.00306926 |
| 128 | Ikzf1    | IKAROS family zinc finger 1                              | chr11    | 2.22                       | 0.00263754 | -3.87                         | 0.00000016 |
| 129 | Psd4     | pleckstrin and Sec7 domain containing 4                  | chr2     | 2.18                       | 0.00345950 | -2.98                         | 0.00019628 |
| 130 | Spn      | sialophorin                                              | chr7     | 2.14                       | 0.00363685 | -3.06                         | 0.00000287 |
| 131 | Hmgb2    | high mobility group box 2                                | chr8     | 2.14                       | 0.00003441 | -2.26                         | 0.00000462 |
| 132 | Selplg   | selectin, platelet (p-selectin) ligand                   | chr5     | 2.13                       | 0.00314154 | -2.85                         | 0.00012451 |
| 133 | Dlgap5   | DLG associated protein 5                                 | chr14    | 2.12                       | 0.00762526 | -4.69                         | 0.00001236 |
| 134 | H2-Aa    | histocompatibility 2, class II antigen A, alpha          | chr17    | 2.09                       | 0.00643965 | -2.23                         | 0.00426046 |
| 135 | Sema4d   | semaphorin 4D                                            | chr13    | 2.07                       | 0.00119369 | -2.21                         | 0.00083843 |
| 136 | Mpeg1    | macrophage expressed gene 1                              | chr19    | 2.07                       | 0.00739749 | -2.95                         | 0.00001279 |
| 137 | Myo1g    | myosin IG                                                | chr11    | 2.05                       | 0.00819989 | -3.85                         | 0.00000032 |
| 138 | Pclaf    | PCNA clamp associated factor                             | chr9     | 2.00                       | 0.00922412 | -3.65                         | 0.00000918 |
| 139 | Ptpn6    | protein tyrosine phosphatase, non-receptor type 6        | chr6     | 2.00                       | 0.00882316 | -2.98                         | 0.00010761 |
| 140 | Kif11    | kinesin family member 11                                 | chr19    | 1.97                       | 0.00320371 | -4.96                         | 0.00000001 |



**Supplemental Table 1 (continued). A complete list of 180 genes whose mRNAs are upregulated by orchietomy (Orx vs. Sham Ctrl) but downregulated by exogenous dihydrotestosterone (DHT) administration to orchietomized mice (Orx+DHT vs. Orx) in the aorta in mice administered Aldo-salt**

| #   | Gene ID  | Description                                                | Location | Fold Change (Orx vs. Ctrl) | P-value    | Fold Change (Orx+DHT vs. Orx) | P-value    |
|-----|----------|------------------------------------------------------------|----------|----------------------------|------------|-------------------------------|------------|
| 141 | St3gal6  | ST3 beta-galactoside alpha-2,3-sialyltransferase 6         | chr16    | 1.95                       | 0.00015243 | -2.99                         | 0.00000000 |
| 142 | Slc7a10  | solute carrier family 7 member 10                          | chr7     | 1.91                       | 0.00003684 | -2.91                         | 0.00000657 |
| 143 | Endou    | endonuclease, polyU-specific                               | chr15    | 1.90                       | 0.00958322 | -2.30                         | 0.00131035 |
| 144 | Top2a    | topoisomerase (DNA) II alpha                               | chr11    | 1.88                       | 0.00650663 | -3.78                         | 0.00000001 |
| 145 | Mthfd1l  | methylenetetrahydrofolate dehydrogenase 1-like             | chr10    | 1.85                       | 0.00002071 | -1.48                         | 0.00306873 |
| 146 | Arhgap45 | Rho GTPase activating protein 45                           | chr10    | 1.83                       | 0.00825779 | -2.20                         | 0.00039083 |
| 147 | Nusap1   | nucleolar and spindle associated protein 1                 | chr2     | 1.83                       | 0.00103524 | -2.44                         | 0.00004059 |
| 148 | Ccr2     | chemokine (C-C motif) receptor 2                           | chr9     | 1.81                       | 0.00949725 | -3.16                         | 0.00000078 |
| 149 | Tbx20    | T-box 20                                                   | chr9     | 1.81                       | 0.00592786 | -2.08                         | 0.00196389 |
| 150 | Lat2     | linker for activation of T cells family, member 2          | chr5     | 1.79                       | 0.00805564 | -2.53                         | 0.00004088 |
| 151 | Bmp3     | bone morphogenetic protein 3                               | chr5     | 1.79                       | 0.00004372 | -1.45                         | 0.00473755 |
| 152 | Rrm2     | ribonucleotide reductase M2                                | chr12    | 1.77                       | 0.00727620 | -2.80                         | 0.00006412 |
| 153 | Galnt6   | polypeptide N-acetylgalactosaminyltransferase 6            | chr15    | 1.76                       | 0.00672652 | -2.33                         | 0.00018578 |
| 154 | Alcam    | activated leukocyte cell adhesion molecule                 | chr16    | 1.72                       | 0.00193548 | -1.84                         | 0.00039358 |
| 155 | Cdca8    | cell division cycle associated 8                           | chr4     | 1.71                       | 0.00379456 | -2.31                         | 0.00075954 |
| 156 | Cpxm1    | carboxypeptidase X 1 (M14 family)                          | chr2     | 1.68                       | 0.00002026 | -2.04                         | 0.00001212 |
| 157 | Irf5     | interferon regulatory factor 5                             | chr6     | 1.65                       | 0.00422174 | -2.51                         | 0.00000055 |
| 158 | Cpz      | carboxypeptidase Z                                         | chr5     | 1.62                       | 0.00211843 | -2.33                         | 0.00009330 |
| 159 | Kifc1    | kinesin family member C1                                   | chr17    | 1.61                       | 0.00700034 | -2.47                         | 0.00008529 |
| 160 | Sox4     | SRY (sex determining region Y)-box 4                       | chr13    | 1.58                       | 0.00208812 | -1.74                         | 0.00020357 |
| 161 | Gpc3     | glypican 3                                                 | chrX     | 1.52                       | 0.00073456 | -3.09                         | 0.00000000 |
| 162 | Arl4c    | ADP-ribosylation factor-like 4C                            | chr1     | 1.50                       | 0.00835630 | -1.84                         | 0.00005559 |
| 163 | Ctsk     | cathepsin K                                                | chr3     | 1.49                       | 0.00252571 | -1.84                         | 0.00014613 |
| 164 | St3gal4  | ST3 beta-galactoside alpha-2,3-sialyltransferase 4         | chr9     | 1.48                       | 0.00249456 | -1.57                         | 0.00090671 |
| 165 | Efemp1   | EGF-containing fibulin-like extracellular matrix protein 1 | chr11    | 1.48                       | 0.00960942 | -2.46                         | 0.00000004 |
| 166 | Chst2    | carbohydrate sulfotransferase 2                            | chr9     | 1.43                       | 0.00706828 | -1.56                         | 0.00174383 |
| 167 | Mcm4     | minichromosome maintenance complex component 4             | chr16    | 1.42                       | 0.00303205 | -1.45                         | 0.00020502 |
| 168 | Mcm3     | minichromosome maintenance complex component 3             | chr1     | 1.40                       | 0.00005370 | -1.63                         | 0.00000000 |
| 169 | Mmp2     | matrix metalloproteinase 2                                 | chr19    | 1.35                       | 0.00322527 | -1.90                         | 0.00000004 |
| 170 | Prpc     | prolylcarboxypeptidase (angiotensinase C)                  | chr7     | 1.33                       | 0.00586741 | -1.58                         | 0.00000028 |
| 171 | Sparcl1  | SPARC-like 1                                               | chr5     | 1.31                       | 0.00162648 | -1.39                         | 0.00000000 |
| 172 | Rcn1     | reticulocalbin 1                                           | chr2     | 1.31                       | 0.00273570 | -1.57                         | 0.00011684 |
| 173 | Cmtm3    | CKLF-like MARVEL transmembrane domain containing 3         | chr8     | 1.29                       | 0.00967474 | -1.47                         | 0.00487152 |
| 174 | C1ra     | complement component 1, r subcomponent A                   | chr6     | 1.28                       | 0.00999725 | -1.71                         | 0.00000593 |
| 175 | Pdcd4    | programmed cell death 4                                    | chr19    | 1.26                       | 0.00654881 | -1.40                         | 0.00017664 |
| 176 | Pcna     | proliferating cell nuclear antigen                         | chr2     | 1.24                       | 0.00890499 | -1.42                         | 0.00001990 |
| 177 | Hmgb1    | high mobility group box 1                                  | chr5     | 1.24                       | 0.00172916 | -1.30                         | 0.00004352 |
| 178 | Pon2     | paraoxonase 2                                              | chr6     | 1.23                       | 0.00892161 | -1.34                         | 0.00006575 |
| 179 | Alyref   | Aly/REF export factor                                      | chr11    | 1.23                       | 0.00625671 | -1.32                         | 0.00066921 |
| 180 | Aqp1     | aquaporin 1                                                | chr6     | 1.17                       | 0.00964582 | -1.34                         | 0.00000000 |

**Supplemental Table 2. A complete list of 150 genes whose mRNAs are downregulated by orchietomy (Orx vs. Sham Ctrl) but upregulated by exogenous dihydrotestosterone (DHT) administration to orchietomized mice (Orx+DHT vs. Orx) in the aorta in mice administered Aldo-salt**

| #  | Gene ID       | Description                                                 | Location | Fold Change (Orx vs. Ctrl) | P-value    | Fold Change (Orx+DHT vs. Orx) | P-value    |
|----|---------------|-------------------------------------------------------------|----------|----------------------------|------------|-------------------------------|------------|
| 1  | Myh4          | myosin heavy chain 4, skeletal muscle                       | chr11    | -26.73655093               | 0.00006572 | 13.92182629                   | 0.00655175 |
| 2  | Cacng6        | calcium channel, voltage-dependent, gamma subunit 6         | chr7     | -24.8409316                | 0.00276263 | 34.25279623                   | 0.00031960 |
| 3  | Slco1a1       | solute carrier organic anion transporter family, member 1a1 | chr6     | -17.09886947               | 0.00233895 | 19.12046232                   | 0.00069800 |
| 4  | Scd3          | stearoyl-coenzyme A desaturase 3                            | chr19    | -15.297534                 | 0.00034029 | 10.74260432                   | 0.00185519 |
| 5  | Gm45915       | immune system associated SCR family kinase partner          | chr14    | -12.55500926               | 0.00721071 | 18.11818619                   | 0.00484563 |
| 6  | Atp2a1        | ATPase, Ca++ transporting, cardiac muscle, fast twitch 1    | chr7     | -9.529129404               | 0.00221234 | 11.66179158                   | 0.00002494 |
| 7  | Bmp8b         | bone morphogenetic protein 8b                               | chr4     | -8.942783046               | 0.00154569 | 6.639997161                   | 0.00049010 |
| 8  | Pvalb         | parvalbumin                                                 | chr15    | -8.822837329               | 0.00479196 | 6.289348289                   | 0.00563687 |
| 9  | Heph11        | hephaestin-like 1                                           | chr9     | -8.50672212                | 0.00000000 | 7.173434607                   | 0.00000007 |
| 10 | Mybpc1        | myosin binding protein C, slow-type                         | chr10    | -7.475004077               | 0.00826108 | 24.30187667                   | 0.00000293 |
| 11 | Rspo4         | R-spondin 4                                                 | chr2     | -5.295639174               | 0.00762548 | 6.232415488                   | 0.00003637 |
| 12 | Tnnc2         | troponin C2, fast                                           | chr2     | -5.279964009               | 0.00430892 | 8.774819367                   | 0.00000080 |
| 13 | Actn3         | actinin alpha 3                                             | chr19    | -5.149314201               | 0.00176955 | 4.103126291                   | 0.00081762 |
| 14 | Mylpf         | myosin light chain, phosphorylatable, fast skeletal muscle  | chr7     | -5.030485019               | 0.00066253 | 7.205542241                   | 0.00000006 |
| 15 | Adcy10        | adenylate cyclase 10                                        | chr1     | -4.824251965               | 0.00009234 | 3.767798349                   | 0.00021866 |
| 16 | 6430571L13Rik | RIKEN cDNA 6430571L13 gene                                  | chr9     | -4.779242313               | 0.00000351 | 3.82626693                    | 0.00000183 |
| 17 | Slc15a5       | solute carrier family 15, member 5                          | chr6     | -4.731133154               | 0.00120820 | 9.931236506                   | 0.00000019 |
| 18 | Myoz1         | myozenin 1                                                  | chr14    | -4.198139313               | 0.00400330 | 4.115450402                   | 0.00023289 |
| 19 | Neb           | nebulin                                                     | chr2     | -3.97642231                | 0.0010067  | 6.946361658                   | 0.00000000 |
| 20 | Slc2a5        | solute carrier family 2 member 5                            | chr4     | -3.772616571               | 0.00130678 | 4.822316769                   | 0.00000321 |
| 21 | Marc1         | mitochondrial amidoxime reducing component 1 (Mtarc1)       | chr1     | -3.70937506                | 0.00011831 | 3.852321405                   | 0.00000015 |
| 22 | Tfr2          | transferrin receptor 2                                      | chr5     | -3.702884638               | 0.00008953 | 3.178095483                   | 0.00036694 |
| 23 | 2310069B03Rik | RIKEN cDNA 2310069B03 gene                                  | chr6     | -3.430601918               | 0.00442447 | 2.879139611                   | 0.00067184 |
| 24 | Mlxipl        | MLX interacting protein-like                                | chr5     | -3.304635818               | 0.0000362  | 2.771832582                   | 0.00014300 |
| 25 | Hapln4        | hyaluronan and proteoglycan link protein 4                  | chr8     | -3.295089637               | 0.00001340 | 4.638451257                   | 0.00012873 |
| 26 | Pnpla3        | patatin-like phospholipase domain containing 3              | chr15    | -3.27063947                | 0.00000031 | 2.301166383                   | 0.00013270 |
| 27 | Gm11520       | predicted gene 11520                                        | chr11    | -3.193152912               | 0.00517541 | 2.603489383                   | 0.00575359 |
| 28 | Ttc25         | outer dynein arm complex subunit 4 (Odad4)                  | chr11    | -3.188548614               | 0.00282747 | 3.386327104                   | 0.00003446 |
| 29 | Fam57b        | TLC domain containing 3B (Tlcd3b)                           | chr7     | -3.051711678               | 0.00065974 | 2.534739256                   | 0.00119985 |
| 30 | Elov3         | ELOVL fatty acid elongase 3                                 | chr19    | -2.878781262               | 0.00170205 | 2.572605219                   | 0.00055543 |
| 31 | Odf3l1        | outer dense fiber of sperm tails 3-like 1                   | chr9     | -2.858605255               | 0.00210978 | 2.613562674                   | 0.00334420 |
| 32 | Angptl8       | angiopoietin-like 8                                         | chr9     | -2.830001395               | 0.00044141 | 2.342879714                   | 0.00000034 |
| 33 | Acaca         | acetyl-Coenzyme A carboxylase alpha                         | chr11    | -2.825987526               | 0.00006213 | 2.328369192                   | 0.00116391 |
| 34 | Ctcf1         | CCCTC-binding factor (zinc finger protein)-like             | chr2     | -2.822863407               | 0.00004196 | 3.147440361                   | 0.00007848 |
| 35 | Scd1          | stearoyl-Coenzyme A desaturase 1                            | chr19    | -2.79365452                | 0.00000214 | 2.024278423                   | 0.00035163 |
| 36 | Acly          | ATP citrate lyase                                           | chr11    | -2.786751051               | 0.00024856 | 2.231941973                   | 0.00211594 |
| 37 | Acacb         | acetyl-Coenzyme A carboxylase beta                          | chr5     | -2.730347215               | 0.00006324 | 2.345124918                   | 0.00069934 |
| 38 | Fasn          | fatty acid synthase                                         | chr11    | -2.711814031               | 0.00027666 | 2.360887753                   | 0.00221614 |
| 39 | Acot11        | acyl-CoA thioesterase 11                                    | chr4     | -2.699798185               | 0.00033497 | 2.303976145                   | 0.00054574 |
| 40 | Hk2           | hexokinase 2                                                | chr6     | -2.695666378               | 0.00000499 | 2.28503619                    | 0.00003183 |
| 41 | Ncan          | neurocan                                                    | chr8     | -2.670425807               | 0.00009096 | 13.10809959                   | 0.00000233 |
| 42 | Kng2          | kininogen 2                                                 | chr16    | -2.631043584               | 0.00190526 | 2.38354522                    | 0.00392413 |
| 43 | Impa2         | inositol monophosphatase 2                                  | chr18    | -2.599388357               | 0.00033038 | 2.340899643                   | 0.00138838 |
| 44 | Ppp1r3b       | protein phosphatase 1, regulatory subunit 3B                | chr8     | -2.585642632               | 0.00010491 | 1.868952864                   | 0.00206128 |
| 45 | Gm32200       | predicted gene, 32200                                       | chr1     | -2.579560512               | 0.00059940 | 2.384251324                   | 0.00031380 |
| 46 | Plin2         | perilipin 2                                                 | chr4     | -2.57301374                | 0.00036310 | 2.56262567                    | 0.00000827 |
| 47 | Elov6         | ELOVL fatty acid elongase 6                                 | chr3     | -2.563104392               | 0.00178066 | 2.31783194                    | 0.00214619 |
| 48 | B430212C06Rik | RIKEN cDNA B430212C06 gene                                  | chr18    | -2.555155617               | 0.00465133 | 2.191188656                   | 0.00387148 |
| 49 | Deptor        | DEP domain containing MTOR-interacting protein              | chr15    | -2.534030055               | 0.00010325 | 2.283292166                   | 0.00060302 |
| 50 | Orm1          | orosomuroid 1                                               | chr4     | -2.487835722               | 0.00029616 | 1.930801808                   | 0.00018227 |
| 51 | Ybx2          | Y box protein 2                                             | chr11    | -2.372547721               | 0.00068539 | 2.497398859                   | 0.00016660 |
| 52 | C7            | complement component 7                                      | chr15    | -2.364556185               | 0.00299812 | 2.582352233                   | 0.00371133 |
| 53 | Me1           | malic enzyme 1, NADP(+)-dependent, cytosolic                | chr9     | -2.312458522               | 0.00147527 | 2.197144045                   | 0.00007772 |
| 54 | Tmem79        | transmembrane protein 79                                    | chr3     | -2.308283014               | 0.00247910 | 2.308631183                   | 0.00046048 |
| 55 | Mybpc2        | myosin binding protein C, fast-type                         | chr7     | -2.303774322               | 0.00788846 | 2.575690918                   | 0.00017106 |
| 56 | Nat8l         | N-acetyltransferase 8-like                                  | chr5     | -2.303048643               | 0.00078200 | 2.36004515                    | 0.00045022 |
| 57 | Agpat2        | 1-acylglycerol-3-phosphate O-acyltransferase 2              | chr2     | -2.298558276               | 0.00191509 | 2.177002225                   | 0.00036141 |
| 58 | Lpin1         | lipin 1                                                     | chr12    | -2.294161149               | 0.00010579 | 1.851453715                   | 0.00105545 |
| 59 | Acss2         | acyl-CoA synthetase short-chain family member 2             | chr2     | -2.292827529               | 0.00169793 | 1.829010795                   | 0.00664079 |
| 60 | Sbk1          | SH3-binding kinase 1                                        | chr7     | -2.290899165               | 0.00041209 | 2.155875982                   | 0.00016710 |
| 61 | Pfkl          | phosphofructokinase, liver, B-type                          | chr10    | -2.271973256               | 0.00054044 | 2.306888751                   | 0.00004527 |
| 62 | Paqr9         | progesterin and adipoQ receptor family member IX            | chr9     | -2.265359905               | 0.00101696 | 1.911965951                   | 0.00644233 |
| 63 | Slc16a1       | solute carrier family 16 member 1                           | chr3     | -2.262846428               | 0.00097938 | 1.655724294                   | 0.00883555 |
| 64 | Sfxn5         | sideroflexin 5                                              | chr6     | -2.252235361               | 0.00108356 | 1.833943093                   | 0.00571332 |
| 65 | Ibsp          | integrin binding sialoprotein                               | chr5     | -2.234168899               | 0.00231733 | 4.716266365                   | 0.00000000 |
| 66 | Gpd1          | glycerol-3-phosphate dehydrogenase 1                        | chr15    | -2.217866746               | 0.00302967 | 2.132792299                   | 0.00334719 |
| 67 | Plin5         | perilipin 5                                                 | chr17    | -2.191033023               | 0.00393885 | 1.996942247                   | 0.00169445 |
| 68 | Hoxc5         | homeobox C5                                                 | chr15    | -2.186362002               | 0.00085246 | 2.204316809                   | 0.00391005 |
| 69 | Tusc5         | trafficking regulator of GLUT4 (SLC2A4) 1 (Trarg1)          | chr11    | -2.157952745               | 0.00113431 | 2.115138551                   | 0.00027939 |
| 70 | Acsf3         | acyl-CoA synthetase family member 3                         | chr8     | -2.132420125               | 0.00240348 | 2.222633743                   | 0.00035874 |

**Supplemental Table 2 (continued). A complete list of 150 genes whose mRNAs are downregulated by orchietomy (Orx vs. sham Ctrl) but upregulated by exogenous dihydrotestosterone (DHT) administration to orchietomized mice (Orx+DHT vs. Orx) in the aorta in mice administered Aldo-salt**

| #   | Gene ID       | Description                                                | Location | Fold Change (Orx vs. Ctrl) | P-value    | Fold Change (Orx+DHT vs. Orx) | P-value    |
|-----|---------------|------------------------------------------------------------|----------|----------------------------|------------|-------------------------------|------------|
| 71  | Pgd           | phosphogluconate dehydrogenase                             | chr4     | -2.131726713               | 0.00205066 | 2.143337945                   | 0.00010505 |
| 72  | 9330102E08Rik | RIKEN cDNA 9330102E08 gene                                 | chr6     | -2.107627848               | 0.00486940 | 2.024567569                   | 0.00211630 |
| 73  | Tkt           | transketolase                                              | chr14    | -2.091740646               | 0.00409522 | 2.067176939                   | 0.00206869 |
| 74  | Acsl5         | acyl-CoA synthetase long-chain family member 5             | chr19    | -2.078736676               | 0.00200660 | 1.853073813                   | 0.00221677 |
| 75  | Dhdh2         | DDHD domain containing 2                                   | chr8     | -2.068611456               | 0.00072610 | 1.865787973                   | 0.00224640 |
| 76  | Slc25a1       | solute carrier family 25 member 1                          | chr16    | -2.03651381                | 0.00864575 | 2.51048562                    | 0.00001006 |
| 77  | Tmem120b      | transmembrane protein 120B                                 | chr5     | -2.02086396                | 0.00287219 | 1.743871312                   | 0.00334209 |
| 78  | Comt          | catechol-O-methyltransferase                               | chr16    | -1.963952441               | 0.00138519 | 2.121874011                   | 0.00000058 |
| 79  | Aacs          | acetoacetyl-CoA synthetase                                 | chr5     | -1.939758149               | 0.00247771 | 1.781540914                   | 0.00417571 |
| 80  | Tmem45b       | transmembrane protein 45b                                  | chr9     | -1.93866892                | 0.00754666 | 1.588854032                   | 0.00752814 |
| 81  | Mecr          | mitochondrial trans-2-enoyl-CoA reductase                  | chr4     | -1.928501137               | 0.00395059 | 1.72435937                    | 0.00619958 |
| 82  | Hp            | haptoglobin                                                | chr8     | -1.886586334               | 0.00279771 | 2.248206394                   | 0.00012413 |
| 83  | Hsd11b1       | hydroxysteroid 11-beta dehydrogenase 1                     | chr1     | -1.881418688               | 0.00007937 | 1.60069324                    | 0.00378482 |
| 84  | Hacd2         | 3-hydroxyacyl-CoA dehydratase 2                            | chr16    | -1.867366825               | 0.00218642 | 1.617045546                   | 0.00328187 |
| 85  | Mrap          | melanocortin 2 receptor accessory protein                  | chr16    | -1.860112556               | 0.00563508 | 1.729569949                   | 0.00198629 |
| 86  | Kcnb1         | potassium voltage-gated channel subfamily B member 1       | chr2     | -1.853407374               | 0.00063840 | 1.852136652                   | 0.00426265 |
| 87  | Lss           | lanosterol synthase                                        | chr10    | -1.850836766               | 0.00013245 | 1.605997685                   | 0.00385468 |
| 88  | Rmdn3         | regulator of microtubule dynamics 3                        | chr2     | -1.848397365               | 0.00447196 | 1.572412075                   | 0.00838924 |
| 89  | Tlcd1         | TLC domain containing 1                                    | chr11    | -1.840102931               | 0.00377380 | 1.710694622                   | 0.00018632 |
| 90  | Cnm2          | cyclin M2                                                  | chr19    | -1.801393238               | 0.00000237 | 1.782632062                   | 0.00004313 |
| 91  | G6pdx         | glucose-6-phosphate dehydrogenase X-linked                 | chrX     | -1.800836729               | 0.00272730 | 1.543627875                   | 0.00353357 |
| 92  | Stradb        | STE20-related kinase adaptor beta                          | chr1     | -1.798053004               | 0.00119327 | 1.599447743                   | 0.00099766 |
| 93  | C1rl          | complement component 1, r subcomponent-like                | chr6     | -1.784992951               | 0.00033755 | 1.509456118                   | 0.0099971  |
| 94  | Pcyt2         | phosphate cytidyltransferase 2, ethanolamine               | chr11    | -1.7697534                 | 0.00657982 | 1.73544584                    | 0.00268045 |
| 95  | Nmnat1        | nicotinamide nucleotide adenyltransferase 1                | chr4     | -1.743290137               | 0.00188101 | 1.707795439                   | 0.00008760 |
| 96  | Lrrc39        | eucine rich repeat containing 39                           | chr3     | -1.740638829               | 0.00000018 | 1.386946913                   | 0.00128862 |
| 97  | Phlda3        | pleckstrin homology like domain family A member 3          | chr1     | -1.716044185               | 0.00818734 | 1.743282126                   | 0.00095372 |
| 98  | Mgl1          | monoglyceride lipase                                       | chr6     | -1.683459704               | 0.0076891  | 1.576835916                   | 0.00910642 |
| 99  | Nfil3         | nuclear factor, interleukin 3, regulated                   | chr13    | -1.667030556               | 0.00111362 | 1.441425339                   | 0.00225324 |
| 100 | Mvd           | mevalonate (diphospho) decarboxylase                       | chr8     | -1.65412722                | 0.00378824 | 1.673206738                   | 0.00221631 |
| 101 | Cox19         | cytochrome c oxidase assembly protein 19                   | chr5     | -1.650729314               | 0.00767108 | 1.774601459                   | 0.00030905 |
| 102 | Slc22a3       | solute carrier family 22 member 3                          | chr17    | -1.630520927               | 0.00003373 | 1.740924376                   | 0.00000000 |
| 103 | Coa5          | cytochrome C oxidase assembly factor 5                     | chr1     | -1.624452201               | 0.00810975 | 1.5297709                     | 0.00265661 |
| 104 | Cars2         | cysteinyI-tRNA synthetase 2 (mitochondrial)                | chr8     | -1.621565232               | 0.00555612 | 1.529314002                   | 0.00289166 |
| 105 | Carmn         | cardiac mesoderm enhancer-associated non-coding RNA        | chr18    | -1.619787595               | 0.00197920 | 2.918660771                   | 0.00000000 |
| 106 | Itpk1         | inositol 1,3,4-triphosphate 5/6 kinase                     | chr12    | -1.589336596               | 0.00256452 | 1.473029058                   | 0.00358650 |
| 107 | Dpep1         | dipeptidase 1                                              | chr8     | -1.5757984                 | 0.00097956 | 1.735499686                   | 0.00043256 |
| 108 | Scd2          | stearoyl-Coenzyme A desaturase 2                           | chr19    | -1.574427077               | 0.00108712 | 1.46864475                    | 0.00098439 |
| 109 | Mmaa          | metabolism of cobalamin associated A                       | chr8     | -1.569681131               | 0.00551116 | 1.454749422                   | 0.00191185 |
| 110 | Ndufaf4       | NADH:ubiquinone oxidoreductase complex assembly factor 4   | chr4     | -1.559775966               | 0.00267275 | 1.462207822                   | 0.00604102 |
| 111 | Mmd           | monocyte to macrophage differentiation-associated          | chr11    | -1.559386139               | 0.00039233 | 1.426513229                   | 0.00044902 |
| 112 | Lurap1        | leucine rich adaptor protein 1                             | chr4     | -1.558933711               | 0.00040246 | 1.582664412                   | 0.00783060 |
| 113 | Cyb5b         | cytochrome b5 type B                                       | chr8     | -1.542238773               | 0.00036187 | 1.384604221                   | 0.00049918 |
| 114 | Apol6         | apolipoprotein L 6                                         | chr15    | -1.532663891               | 0.00115312 | 1.570024671                   | 0.00010926 |
| 115 | P2rx5         | purinergic receptor P2X 5                                  | chr11    | -1.490944297               | 0.00565247 | 1.557318024                   | 0.00080185 |
| 116 | Pank3         | pantothenate kinase 3                                      | chr11    | -1.48337874                | 0.00133920 | 1.517074363                   | 0.00134805 |
| 117 | Npr3          | natriuretic peptide receptor 3                             | chr15    | -1.478076943               | 0.00502678 | 1.426737408                   | 0.00148496 |
| 118 | Meg3          | maternally expressed 3                                     | chr12    | -1.448072809               | 0.00171498 | 1.483402855                   | 0.00161525 |
| 119 | Ptger1        | prostaglandin E receptor 1                                 | chr8     | -1.443791434               | 0.00543476 | 1.446960466                   | 0.00175566 |
| 120 | Sreb1f1       | sterol regulatory element binding transcription factor 1   | chr11    | -1.440616238               | 0.00244150 | 1.400334518                   | 0.00335320 |
| 121 | Top1mt        | DNA topoisomerase 1, mitochondrial                         | chr15    | -1.439810381               | 0.00089557 | 1.582438847                   | 0.00000808 |
| 122 | Trp53inp2     | tumor protein p53 inducible nuclear protein 2              | chr2     | -1.4131865                 | 0.00055115 | 1.438719591                   | 0.0013957  |
| 123 | Agl           | amylo-1,6-glucosidase, 4-alpha-glucanotransferase          | chr3     | -1.406107676               | 0.00004941 | 1.313159241                   | 0.00460060 |
| 124 | Kmt5a         | lysine methyltransferase 5A                                | chr5     | -1.392868198               | 0.00501356 | 1.618484378                   | 0.00001105 |
| 125 | H6pd          | hexose-6-phosphate dehydrogenase (glucose 1-dehydrogenase) | chr4     | -1.388417752               | 0.00061754 | 1.345726239                   | 0.00237135 |
| 126 | Slc26a6       | solute carrier family 26, member 6                         | chr9     | -1.368193118               | 0.00959822 | 1.390056813                   | 0.00881876 |
| 127 | Tmem94        | transmembrane protein 94                                   | chr11    | -1.346056855               | 0.00578169 | 1.410066316                   | 0.00926384 |
| 128 | Zfp91         | zinc finger protein 91                                     | chr19    | -1.339287698               | 0.00145760 | 1.28390934                    | 0.00118220 |
| 129 | Tesk1         | testis specific protein kinase 1                           | chr4     | -1.324693259               | 0.00535743 | 1.542268919                   | 0.00000282 |
| 130 | Dvl3          | Dishevelled segment polarity protein 3                     | chr16    | -1.317613868               | 0.00035895 | 1.384705362                   | 0.00071284 |
| 131 | Tubg1         | tubulin, gamma 1                                           | chr11    | -1.302315434               | 0.00855233 | 1.35846039                    | 0.00019502 |
| 132 | Ankrd40       | ankyrin repeat domain 40                                   | chr11    | -1.291592189               | 0.00224489 | 1.276077607                   | 0.00068951 |
| 133 | Ermp1         | endoplasmic reticulum metalloproteinase 1                  | chr19    | -1.276341119               | 0.00372563 | 1.452032333                   | 0.00000013 |
| 134 | Fam149b       | family with sequence similarity 149, member B              | chr14    | -1.276200989               | 0.00061755 | 1.236998333                   | 0.00150033 |
| 135 | Usp10         | ubiquitin specific peptidase 10                            | chr8     | -1.264677609               | 0.00039713 | 1.248040584                   | 0.00120024 |
| 136 | Cipc          | CLOCK interacting protein, circadian                       | chr12    | -1.255642343               | 0.00250727 | 1.186484603                   | 0.00809228 |
| 137 | Tigar         | Trp53 induced glycolysis regulatory phosphatase            | chr6     | -1.246052953               | 0.00380992 | 1.328222343                   | 0.00024874 |
| 138 | Med24         | mediator complex subunit 24                                | chr11    | -1.245250438               | 0.00001704 | 1.213322503                   | 0.00006806 |
| 139 | Mapk8ip3      | mitogen-activated protein kinase 8 interacting protein 3   | chr17    | -1.237510664               | 0.00746874 | 1.325517425                   | 0.00028239 |
| 140 | Srr           | serine racemase                                            | chr11    | -1.237403941               | 0.00932449 | 1.248915057                   | 0.00383917 |

**Supplemental Table 2 (continued). A complete list of 150 genes whose mRNAs are downregulated by orchietomy (Orx vs. Sham Ctrl) but upregulated by exogenous dihydrotestosterone (DHT) administration to orchietomized mice (Orx+DHT vs. Orx) in the aorta in mice administered Aldo-salt**

| #   | Gene ID | Description                                          | Location | Fold Change (Orx vs. Ctrl) | P-value    | Fold Change (Orx+DHT vs. Orx) | P-value    |
|-----|---------|------------------------------------------------------|----------|----------------------------|------------|-------------------------------|------------|
| 141 | Neurl4  | neuralized E3 ubiquitin protein ligase 4             | chr11    | -1.227717106               | 0.00109247 | 1.298341332                   | 0.00120645 |
| 142 | Rnf10   | ring finger protein 10 [                             | chr5     | -1.2086912                 | 0.00703013 | 1.325846168                   | 0.00061523 |
| 143 | Scaf1   | SR-related CTD-associated factor                     | chr7     | -1.207545164               | 0.00331215 | 1.290980285                   | 0.00004449 |
| 144 | Arfp2   | ADP-ribosylation factor interacting protein 2        | chr7     | -1.202275336               | 0.00061851 | 1.254769016                   | 0.00001189 |
| 145 | Dvl1    | dishevelled segment polarity protein                 | chr4     | -1.190127928               | 0.00946186 | 1.271239888                   | 0.00058910 |
| 146 | Tab2    | TGF-beta activated kinase 1/MAP3K7 binding protein 2 | chr10    | -1.189513717               | 0.00049606 | 1.152624365                   | 0.00630599 |
| 147 | Smg5    | SMG5 nonsense mediated mRNA decay factor             | chr3     | -1.181871224               | 0.00798154 | 1.191993936                   | 0.00409333 |
| 148 | Mbd6    | methyl-CpG binding domain protein 6                  | chr10    | -1.175619455               | 0.00707640 | 1.360700607                   | 0.00029690 |
| 149 | Crebzf  | CREB/ATF bZIP transcription factor                   | chr7     | -1.173629123               | 0.00559876 | 1.185244594                   | 0.00155486 |
| 150 | R3hdm2  | R3H domain containing 2                              | chr10    | -1.140454302               | 0.00334356 | 1.222527753                   | 0.00160605 |

**Supplemental Table 3. A complete list of 65 signaling pathways upregulated by orchietomy (Orx vs. Sham Ctrl) but downregulated by exogenous dihydrotestosterone (DHT) administration to orchietomized mice (Orx+DHT vs. Orx) in the aorta in mice administered Aldo-salt**

| #  | Pathway                                                                              | P-value  | Genes                                                                                                                                                                                                                     |
|----|--------------------------------------------------------------------------------------|----------|---------------------------------------------------------------------------------------------------------------------------------------------------------------------------------------------------------------------------|
| 1  | Interleukin-2 signaling pathway                                                      | 1.37E-16 | Itk;Pcna;Txk;Tcf7;Cxcr5;Ptpn22;Ikzf3;Rasgrp1;Spn;Ctsk;Myb;Itgax;Gpc3;Il21r;Stat4;Pmaip1;Itgb7;Cytip;Ccr2;Cd52;Cr2;Sh2d1a;Cd2;Ptprc;Sell;Lck;Cd5;Il2rb;Pdcd4;Cd27;Irf5;Ptpn6;Ltb;Cd247;Cd69;Il7r;Lat;Il18r1                |
| 2  | T helper cell surface molecules                                                      | 2.19E-16 | Cd2;Ptprc;Cd8a;Cd28;Cd3g;Cd247;Cd3e;Itgal;Cd3d                                                                                                                                                                            |
| 3  | Adaptive immune system                                                               | 5.13E-16 | Blk;Itk;Cd3g;Kif11;Itgal;Cd3e;Rasgrp1;Cd3d;Cd79b;Cd79a;H2-DMa;Grap2;Cd19;Ctsk;Btla;Blnk;Itgb7;H2-Oa;H2-Ob;H2-Ab1;Cd74;H2-Eb2;Ptprc;Sell;Cd8a;Lck;Cd28;Ptpn6;Cd247;Card11;Lat;H2-Aa                                        |
| 4  | T cell receptor signaling in naive CD4+ T cells                                      | 8.86E-16 | Map4k1;Itk;Cd3g;Cd3e;Cd3d;Rasgrp1;Ptprc;Lck;Grap2;Cd28;Ptpn6;Cd247;Card11;Lat                                                                                                                                             |
| 5  | T cell receptor signaling in naive CD8+ T cells                                      | 1.71E-15 | Cd3g;Cd3e;Cd3d;Rasgrp1;Ptprc;Cd8a;Lck;Grap2;Cd28;Ptpn6;Cd247;Card11;Lat                                                                                                                                                   |
| 6  | Cell adhesion molecules (CAMs)                                                       | 3.86E-15 | H2-Eb2;Selplg;Itgal;Spn;Cd2;H2-DMa;Alcam;Ptprc;Sell;Cd8a;Cd28;Itgb7;H2-Oa;H2-Ob;H2-Ab1;Cd22;H2-Aa                                                                                                                         |
| 7  | Immune system                                                                        | 4.89E-15 | Blk;Itk;Cd3g;Hmgb1;Kif11;Itgal;Cd3e;Rasgrp1;Cd3d;Cd79b;Cd79a;H2-DMa;Grap2;Cd19;Ctsk;Btla;Blnk;Itgb7;H2-Oa;H2-Ob;H2-Ab1;Ccr2;Cd74;H2-Eb2;Nup210;Ptprc;Sell;Cd8a;Lck;Il2rb;Cd28;Irf8;Irf5;Ptpn6;Cd247;Il7r;Card11;Lat;H2-Aa |
| 8  | Generation of second messenger molecules                                             | 1.14E-14 | Itk;H2-Eb2;Lck;Grap2;Cd3g;Cd247;Cd3e;Cd3d;H2-Ab1;Lat;H2-Aa                                                                                                                                                                |
| 9  | PD-1 signaling                                                                       | 1.02E-13 | H2-Eb2;Ptprc;Lck;Cd3g;Ptpn6;Cd247;Cd3e;Cd3d;H2-Ab1;H2-Aa                                                                                                                                                                  |
| 10 | Primary immunodeficiency                                                             | 4.10E-13 | Cd79a;Ptprc;Cd8a;Lck;Cd19;Blnk;Tnfrsf13c;Cd3e;Il7r;Cd3d                                                                                                                                                                   |
| 11 | Hematopoietic cell lineage                                                           | 1.10E-12 | Cr2;H2-Eb2;Cd3g;Cd3e;Cd3d;Cd2;Cd8a;Cd5;Cd19;Cd37;Il7r;Ms4a1;Cd22                                                                                                                                                          |
| 12 | Costimulation by the Cd28 family                                                     | 1.87E-12 | H2-Eb2;Lck;Grap2;Btla;Cd28;Cd3g;Ptpn6;Cd247;Cd3e;Cd3d;H2-Ab1;H2-Aa                                                                                                                                                        |
| 13 | Leptin influence on immune response                                                  | 2.04E-11 | Mmp2;Cd3e;Cd3d;Cd79b;Cd79a;Azgp1;Alcam;Sell;Itgax;Irf8;Ltb;Il7r;Ccr2                                                                                                                                                      |
| 14 | T cell receptor signaling pathway                                                    | 3.03E-11 | Itk;Cd3g;Cd3e;Rasgrp1;Cd3d;Ptprc;Cd8a;Lck;Grap2;Cd28;Ptpn6;Cd247;Card11;Lat                                                                                                                                               |
| 15 | T cell receptor regulation of apoptosis                                              | 2.00E-10 | Top2a;Lef1;Cd3g;Hmgb1;Itgal;Cd3e;Rasgrp1;Spn;Myb;Rac2;Il21r;Pmaip1;Ccr2;Map4k1;Cr2;Sema4d;Mmp2;Rhh;Cd2;Ptprc;Lck;Cd28;Ltb;Il7r;H2-Aa                                                                                      |
| 16 | T cell signal transduction                                                           | 2.12E-10 | Lat2;Itk;Ptprc;Lck;Grap2;Cd28;Cd3g;Cd3e;Cd3d;Rasgrp1;Lat                                                                                                                                                                  |
| 17 | Intestinal immune network for IgA production                                         | 3.93E-10 | H2-DMa;H2-Eb2;Cd28;Itgb7;Tnfrsf13c;H2-Oa;H2-Ob;H2-Ab1;H2-Aa                                                                                                                                                               |
| 18 | T cell activation co-stimulatory signal                                              | 4.45E-10 | Itk;Lck;Cd28;Cd3g;Cd247;Cd3e;Cd3d                                                                                                                                                                                         |
| 19 | Lck and Fyn tyrosine kinases in initiation of T cell receptor activation             | 7.96E-10 | Ptprc;Lck;Cd3g;Cd247;Cd3e;Cd3d                                                                                                                                                                                            |
| 20 | Interleukin-17 signaling pathway                                                     | 2.29E-09 | Cd2;Cd8a;Cd3g;Cd247;Cd3e;Cd3d                                                                                                                                                                                             |
| 21 | NO2-dependent IL-12 pathway in NK cells                                              | 5.57E-09 | Cd2;Stat4;Cd3g;Cd247;Cd3e;Cd3d                                                                                                                                                                                            |
| 22 | Interleukin-12-mediated signaling events                                             | 6.57E-09 | Cd8a;Lck;Il2rb;Stat4;Cd3g;Cd247;Cd3e;Cd3d;Il18r1                                                                                                                                                                          |
| 23 | HIV-induced T cell apoptosis                                                         | 6.83E-09 | Cd28;Cd3g;Cd247;Cd3e;Cd3d                                                                                                                                                                                                 |
| 24 | Asthma                                                                               | 7.27E-09 | H2-DMa;H2-Eb2;Prg2;H2-Oa;H2-Ob;H2-Ab1;H2-Aa                                                                                                                                                                               |
| 25 | Antigen-activated B-cell receptor generation of second messengers                    | 7.55E-09 | Blk;Map4k1;Cr2;Cd79b;Lat2;Cd79a;Ptprc;Cd19;Cd28;Rac2;Blnk;Ptpn6;Card11;Cd22                                                                                                                                               |
| 26 | Inhibition of T cell receptor signaling by activated Csk                             | 1.20E-08 | Ptprc;Lck;Cd3g;Cd247;Cd3e;Cd3d                                                                                                                                                                                            |
| 27 | Viral myocarditis                                                                    | 1.46E-08 | H2-DMa;H2-Eb2;Rac2;Cd28;Itgal;H2-Oa;H2-Ob;H2-Ab1;H2-Aa                                                                                                                                                                    |
| 28 | MEF2D role in T cell apoptosis                                                       | 2.31E-08 | Ptprc;Lck;Cd3g;Cd247;Cd3e;Cd3d;Lat                                                                                                                                                                                        |
| 29 | Allograft rejection                                                                  | 3.49E-08 | H2-DMa;H2-Eb2;Cd28;H2-Oa;H2-Ob;H2-Ab1;H2-Aa                                                                                                                                                                               |
| 30 | CTL mediated immune response against target cells                                    | 6.78E-08 | Cd3g;Cd247;Cd3e;Itgal;Cd3d                                                                                                                                                                                                |
| 31 | Graft-versus-host disease                                                            | 7.39E-08 | H2-DMa;H2-Eb2;Cd28;H2-Oa;H2-Ob;H2-Ab1;H2-Aa                                                                                                                                                                               |
| 32 | Type 1 diabetes mellitus                                                             | 1.04E-07 | H2-DMa;H2-Eb2;Cd28;H2-Oa;H2-Ob;H2-Ab1;H2-Aa                                                                                                                                                                               |
| 33 | Interleukin-12/Stat4 pathway                                                         | 1.45E-07 | Stat4;Cd28;Cd3g;Cd247;Cd3e;Cd3d;Il18r1                                                                                                                                                                                    |
| 34 | Cell surface interactions at the vascular wall                                       | 1.75E-07 | Spn;Cd2;Selplg;Sell;Lck;Itgax;Ptpn6;Itgal;Slc7a10                                                                                                                                                                         |
| 35 | MHC class II antigen presentation                                                    | 3.85E-07 | Cd74;H2-Eb2;H2-DMa;Ctsk;Kif11;H2-Oa;H2-Ob;H2-Ab1;H2-Aa                                                                                                                                                                    |
| 36 | Autoimmune thyroid disease                                                           | 4.05E-07 | H2-DMa;H2-Eb2;Cd28;H2-Oa;H2-Ob;H2-Ab1;H2-Aa                                                                                                                                                                               |
| 37 | Tob role in T-cell activation                                                        | 5.86E-07 | Cd28;Cd3g;Cd247;Cd3e;Cd3d                                                                                                                                                                                                 |
| 38 | Antigen processing and presentation                                                  | 6.77E-07 | Cd74;H2-DMa;H2-Eb2;Cd8a;H2-Oa;H2-Ob;H2-Ab1;H2-Aa                                                                                                                                                                          |
| 39 | Hemostasis pathway                                                                   | 1.20E-06 | Selplg;Prp;Kif11;Slc7a10;Itgal;Rasgrp1;Spn;Cd2;Sell;Kifc1;Lck;Myb;Alb;Rac2;Itgax;Ptpn6;Lat                                                                                                                                |
| 40 | Immunoregulatory interactions between a lymphoid and a non-lymphoid cell             | 1.31E-06 | Sell;Cd8a;Cd19;Cd3g;Itgb7;Cd247;Cd3e;Itgal;Cd3d                                                                                                                                                                           |
| 41 | CD8/T cell receptor downstream pathway                                               | 2.60E-06 | Cd8a;Il2rb;Stat4;Cd3g;Cd247;Cd3e;Cd3d                                                                                                                                                                                     |
| 42 | Leishmaniasis                                                                        | 3.83E-06 | H2-DMa;H2-Eb2;Ptpn6;H2-Oa;H2-Ob;H2-Ab1;H2-Aa                                                                                                                                                                              |
| 43 | Interleukin-4 regulation of apoptosis                                                | 5.71E-06 | Top2a;Ar14c;Pou2af1;Tcf7;Mcm3;Cd27;Mcm4;Ltb;Il7r;Rasgrp1;Chst2;H2-Aa                                                                                                                                                      |
| 44 | Stathmin and breast cancer resistance to antimicrotubule agents                      | 7.85E-06 | Cd2;Cd3g;Cd247;Cd3e;Cd3d                                                                                                                                                                                                  |
| 45 | CXCR4 signaling pathway                                                              | 1.02E-05 | Blk;Ptprc;Lck;Cd3g;Ptpn6;Cd247;Cd3e;Cd3d                                                                                                                                                                                  |
| 46 | Alpha-M beta-2 integrin signaling                                                    | 3.22E-05 | Blk;Selplg;Lck;Mmp2;Hmgb1                                                                                                                                                                                                 |
| 47 | Immune system signaling by interferons, interleukins, prolactin, and growth hormones | 4.86E-05 | H2-Eb2;Nup210;Lck;Il2rb;Blnk;Irf8;Irf5;Ptpn6;Il7r;H2-Ab1;H2-Aa                                                                                                                                                            |
| 48 | Ras-independent pathway in NK cell-mediated cytotoxicity                             | 5.86E-05 | Cd2;Cd28;Ptpn6;Lat                                                                                                                                                                                                        |
| 49 | Apoptotic DNA fragmentation and tissue homeostasis                                   | 8.21E-05 | Top2a;Hmgb2;Hmgb1                                                                                                                                                                                                         |
| 50 | Leukocyte transendothelial migration                                                 | 9.18E-05 | Itk;Txk;Mmp2;Rac2;Rhh;Ezr;Itgal                                                                                                                                                                                           |

**Supplemental Table 3 (continued). A complete list of 65 signaling pathways upregulated by orchietomy (Orx vs. Sham Ctrl) but downregulated by exogenous dihydrotestosterone (DHT) administration to orchietomized mice (Orx+DHT vs. Orx) in the aorta in mice administered Aldo-salt**

| #  | Pathway                                                | P-value  | Genes                                                       |
|----|--------------------------------------------------------|----------|-------------------------------------------------------------|
| 51 | B lymphocyte cell surface molecules                    | 1.12E-04 | Cr2;Ptprc;Itgal                                             |
| 52 | Cytokine-cytokine receptor interaction                 | 1.49E-04 | Il2rb;Cxcr5;Il21r;Cd27;Tnfrsf13c;Ltb;Cxcr6;Il7r;Il18r1;Ccr2 |
| 53 | Natural killer cell receptor signaling pathway         | 2.04E-04 | Lat2;Lck;Rac2;Ptpn6;Lat                                     |
| 54 | T cell receptor/JNK pathway                            | 2.43E-04 | Map4k1;Grap2;Lat                                            |
| 55 | Natural killer cell-mediated cytotoxicity              | 2.45E-04 | Lck;Sh2d1a;Rac2;Ptpn6;Cd247;Itgal;Lat                       |
| 56 | Interferon-gamma signaling pathway                     | 2.45E-04 | H2-Eb2;Irf8;Irf5;Ptpn6;H2-Ab1;H2-Aa                         |
| 57 | Systemic lupus erythematosus                           | 2.68E-04 | H2-Eb2;H2-DMa;Cd28;H2-Oa;H2-Ob;H2-Ab1;H2-Aa                 |
| 58 | Adhesion and diapedesis of granulocytes                | 3.01E-04 | Selpg;Sell;Itgal                                            |
| 59 | Signaling by the B cell receptor (BCR)                 | 4.42E-04 | Blk;Cd79b;Cd79a;Cd19;Blnk;Rasgrp1;Card11                    |
| 60 | Dendritic cells in reguLating TH1 and TH2 development  | 4.44E-04 | Cd2;Cd5;Itgax                                               |
| 61 | Phagosome                                              | 4.98E-04 | H2-Eb2;H2-DMa;H2-Oa;H2-Ob;Coro1a;H2-Ab1;H2-Aa               |
| 62 | Interferon signaling                                   | 8.33E-04 | H2-Eb2;Nup210;Irf8;Irf5;Ptpn6;H2-Ab1;H2-Aa                  |
| 63 | Interleukin-2 receptor beta chain in T cell activation | 1.23E-03 | Pcna;Il2rb;Ptpn6;Ikzf3                                      |
| 64 | Endogenous Toll-like receptor signaling                | 1.26E-03 | Hmgb1;S100a9;S100a8                                         |
| 65 | Focal adhesion                                         | 1.26E-03 | Blk;Parvg;Txk;Col11a1;Rac2;Itgax;Itgb7;Itgal                |

**Supplemental Table 4. A complete list of 19 signaling pathways downregulated by orchietomy (Orx vs. Sham Ctrl) but upregulated by exogenous dihydrotestosterone (DHT) administration to orchietomized mice (Orx+DHT vs. Orx) in the aorta in mice administered Aldo-salt**

| #  | Pathway                                                                | P-value  | Genes                                                                                                                                                                                        |
|----|------------------------------------------------------------------------|----------|----------------------------------------------------------------------------------------------------------------------------------------------------------------------------------------------|
| 1  | Triglyceride biosynthesis                                              | 1.64E-13 | Slc25a1;Acly;Fasn;Elov13;Gpd1;Acsl5;Elov16;Lpin1;Agpat2;Acaca                                                                                                                                |
| 2  | Fatty acid, triacylglycerol, and ketone body metabolism                | 3.63E-12 | Slc25a1;Srebf1;Elov13;Acsl5;Elov16;Acacb;Agpat2;Acaca;Acly;Med24;Fasn;Gpd1;Me1;Plin2;Lpin1                                                                                                   |
| 3  | Fatty acyl-CoA biosynthesis                                            | 3.44E-11 | Slc25a1;Acly;Fasn;Elov13;Acsl5;Elov16;Acaca                                                                                                                                                  |
| 4  | Lipid and lipoprotein metabolism                                       | 1.13E-10 | Slc25a1;Srebf1;Pcyt2;Elov13;Acsl5;Elov16;Acacb;Lss;Agpat2;Acaca;Hsd11b1;Acly;Med24;Fasn;Gpd1;Me1;Pnpla3;Plin2;Mvd;Lpin1;MglI                                                                 |
| 5  | Fatty acid biosynthesis                                                | 4.98E-10 | Acly;Acss2;Mecr;Fasn;Acsl5;Acacb;Acaca                                                                                                                                                       |
| 6  | ChREBP activates metabolic gene expression                             | 1.22E-09 | Acly;Mlxip1;Fasn;Acacb;Acaca                                                                                                                                                                 |
| 7  | Metabolism                                                             | 2.72E-08 | Pank3;H6pd;Acss2;Ncan;Comt;Acacb;Agpat2;Acaca;Hk2;Hsd11b1;Impa2;Me1;Mecr;Pcyt2;Kcnb1;Agl;Elov13;Itpk1;Acsl5;Elov16;Pgd;Lss;Acly;Mlxip1;Pfk1;Med24;Nmnat1;Fasn;Gpd1;Pnpla3;Mvd;Tkt;Lpin1;MglI |
| 8  | Striated muscle contraction                                            | 9.12E-06 | Mybpc1;Mybpc2;Actn3;Tnnc2;Neb                                                                                                                                                                |
| 9  | Shuttle for transfer of acetyl groups from mitochondria to the cytosol | 2.25E-05 | Slc25a1;Acly;Me1                                                                                                                                                                             |
| 10 | Muscle contraction                                                     | 3.24E-05 | Mybpc1;Mybpc2;Actn3;Tnnc2;Neb                                                                                                                                                                |
| 11 | Ghrelin pathway                                                        | 3.40E-05 | Srebf1;Fasn;Plin2;Acaca                                                                                                                                                                      |
| 12 | Pyruvate metabolism                                                    | 4.34E-05 | Acss2;Slc16a1;Me1;Acacb;Acaca                                                                                                                                                                |
| 13 | Integration of energy metabolism                                       | 4.42E-05 | Acly;Mlxip1;Kcnb1;Fasn;Tkt;Acacb;Acaca                                                                                                                                                       |
| 14 | Glycerophospholipid biosynthesis                                       | 4.62E-05 | Pcyt2;Gpd1;Pnpla3;Lpin1;Agpat2;MglI                                                                                                                                                          |
| 15 | Pentose phosphate pathway                                              | 4.66E-05 | Pfk1;H6pd;Pgd;Tkt                                                                                                                                                                            |
| 16 | AMPK signaling                                                         | 1.58E-04 | Srebf1;Stradb;Fasn;Acacb;Acaca                                                                                                                                                               |
| 17 | Carbohydrate metabolism                                                | 4.05E-04 | Slc25a1;Pfk1;Ncan;Agl;Pgd;Slc2a5;Tkt;Hk2                                                                                                                                                     |
| 18 | Adipogenesis                                                           | 5.05E-04 | Srebf1;Dvl1;Pnpla3;Plin2;Lpin1;Agpat2                                                                                                                                                        |
| 19 | Acyl chain remodeling of diacylglycerol and triacylglycerol            | 5.51E-04 | Pnpla3;MglI                                                                                                                                                                                  |

**Supplemental Table 5. A complete list of T cell subsets analyzed by flow cytometry in the aorta in sham-operated and orchietomized (Orx) mice administered Aldo-salt with and without dihydrotestosterone (DHT)**

| Subsets                                       | CD markers                                                                                                                    | # of T cells / aorta |            |            | % of T cells |                   |             |
|-----------------------------------------------|-------------------------------------------------------------------------------------------------------------------------------|----------------------|------------|------------|--------------|-------------------|-------------|
|                                               |                                                                                                                               | Sham                 | Orx        | Orx+DHT    | Sham         | Orx               | Orx+DHT     |
| T cells                                       | CD45 <sup>+</sup> CD3 <sup>+</sup>                                                                                            | 1,198±362            | 7,597±3066 | 3,381±1560 | 56.40±5.84%  | 72.17±4.07%*      | 65.34±4.14% |
| CD4 T cells                                   | CD45 <sup>+</sup> CD3 <sup>+</sup> CD4 <sup>+</sup>                                                                           | 245±76               | 2,537±1076 | 932±451    | 22.40±2.28%  | 31.70±1.68%***, # | 26.04±1.19% |
| CD8 T cells                                   | CD45 <sup>+</sup> CD3 <sup>+</sup> CD8 <sup>+</sup>                                                                           | 490±129              | 4,165±1817 | 1,686±867  | 42.55±2.95%  | 47.92±3.15%       | 42.26±3.00% |
| Naïve CD4 T cells                             | CD45 <sup>+</sup> CD3 <sup>+</sup> CD4 <sup>+</sup> CD44 <sup>-</sup> CD62L <sup>+</sup>                                      | 89±25                | 1,808±838  | 593±322    | 34.51±7.03%  | 59.37±4.14%**     | 49.55±5.46% |
| Naïve CD8 T cells                             | CD45 <sup>+</sup> CD3 <sup>+</sup> CD8 <sup>+</sup> CD44 <sup>-</sup> CD62L <sup>+</sup>                                      | 122±37               | 2,532±1267 | 805±478    | 23.49±5.57%  | 46.83±4.46%**     | 34.39±4.42% |
| Central memory CD4 T cells                    | CD45 <sup>+</sup> CD3 <sup>+</sup> CD4 <sup>+</sup> CD44 <sup>+</sup> CD62L <sup>+</sup>                                      | 9±3                  | 81±37      | 44±23      | 3.66±1.09%   | 5.10±0.82%        | 4.92±0.48%  |
| Central memory CD8 T cells                    | CD45 <sup>+</sup> CD3 <sup>+</sup> CD8 <sup>+</sup> CD44 <sup>+</sup> CD62L <sup>+</sup>                                      | 94±29                | 961±406    | 460±253    | 16.29±5.02%  | 22.07±2.01%       | 21.46±2.62% |
| Effector CD4 T cells                          | CD45 <sup>+</sup> CD3 <sup>+</sup> CD4 <sup>+</sup> CD44 <sup>+</sup> CD62L <sup>-</sup> CD127 <sup>-</sup>                   | 72±28                | 222±66     | 129±57     | 27.75±3.85%  | 13.60±1.66%***    | 17.52±2.18% |
| Effector CD8 T cells                          | CD45 <sup>+</sup> CD3 <sup>+</sup> CD8 <sup>+</sup> CD44 <sup>+</sup> CD62L <sup>-</sup> CD127 <sup>-</sup>                   | 198±75               | 316±87     | 225±74     | 44.20±10.16% | 16.73±3.22%**     | 27.14±4.23% |
| Effector memory CD4 T cells                   | CD45 <sup>+</sup> CD3 <sup>+</sup> CD4 <sup>+</sup> CD44 <sup>+</sup> CD62L <sup>-</sup> CD127 <sup>+</sup>                   | 41±15                | 95±20      | 70±22      | 20.35±6.68%  | 9.57±2.03%*       | 13.04±2.50% |
| Effector memory CD8 T cells                   | CD45 <sup>+</sup> CD3 <sup>+</sup> CD8 <sup>+</sup> CD44 <sup>+</sup> CD62L <sup>-</sup> CD127 <sup>+</sup>                   | 22±6                 | 80±22      | 56±21      | 5.63±1.32%   | 4.03±0.89%        | 5.76±1.25%  |
| PD-1 <sup>+</sup> T cells                     | CD45 <sup>+</sup> CD3 <sup>+</sup> PD-1 <sup>+</sup>                                                                          | 405±137              | 966±295    | 563±207    | 34.60±3.87%  | 19.02±2.50%**     | 25.13±3.53% |
| PD-1 <sup>+</sup> CD4 T cells                 | CD45 <sup>+</sup> CD3 <sup>+</sup> CD4 <sup>+</sup> PD-1 <sup>+</sup>                                                         | 66±22                | 254±98     | 137±63     | 27.55±3.41%  | 17.69±1.80%*      | 14.91±2.79% |
| PD-1 <sup>+</sup> CD8 T cells                 | CD45 <sup>+</sup> CD3 <sup>+</sup> CD8 <sup>+</sup> PD-1 <sup>+</sup>                                                         | 172±66               | 321±96     | 213±82     | 34.83±6.11%  | 13.15±2.06%***, # | 25.11±4.89% |
| PD-1 <sup>+</sup> naïve CD4 T cells           | CD45 <sup>+</sup> CD3 <sup>+</sup> CD4 <sup>+</sup> CD44 <sup>-</sup> CD62L <sup>+</sup> PD-1 <sup>+</sup>                    | 0                    | 9±5        | 4±3        | 0.11±0.11%   | 0.52±0.15%        | 0.21±0.14%  |
| PD-1 <sup>+</sup> naïve CD8 T cells           | CD45 <sup>+</sup> CD3 <sup>+</sup> CD8 <sup>+</sup> CD44 <sup>-</sup> CD62L <sup>+</sup> PD-1 <sup>+</sup>                    | 1±1                  | 4±3        | 2±1        | 0.65±0.30%   | 0.48±0.21%        | 0.05±0.04%  |
| PD-1 <sup>+</sup> central memory CD4 T cells  | CD45 <sup>+</sup> CD3 <sup>+</sup> CD4 <sup>+</sup> CD44 <sup>+</sup> CD62L <sup>+</sup> PD-1 <sup>+</sup>                    | 0                    | 16±8       | 6±3        | 1.28±1.28%   | 12.37±3.52%*      | 6.10±2.53%  |
| PD-1 <sup>+</sup> central memory CD8 T cells  | CD45 <sup>+</sup> CD3 <sup>+</sup> CD8 <sup>+</sup> CD44 <sup>+</sup> CD62L <sup>+</sup> PD-1 <sup>+</sup>                    | 2±1                  | 11±6       | 5±2        | 1.18±0.58%   | 2.72±0.72%        | 1.12±0.59%  |
| PD-1 <sup>+</sup> effector CD4 T cells        | CD45 <sup>+</sup> CD3 <sup>+</sup> CD4 <sup>+</sup> CD44 <sup>+</sup> CD62L <sup>-</sup> CD127 <sup>-</sup> PD-1 <sup>+</sup> | 9±2                  | 78±31      | 32±16      | 22.59±7.08%  | 31.10±4.59%       | 18.61±3.68% |
| PD-1 <sup>+</sup> effector CD8 T cells        | CD45 <sup>+</sup> CD3 <sup>+</sup> CD8 <sup>+</sup> CD44 <sup>+</sup> CD62L <sup>-</sup> CD127 <sup>-</sup> PD-1 <sup>+</sup> | 112±50               | 111±37     | 85±33      | 55.18±7.69%  | 29.77±3.72%**     | 39.06±6.28% |
| PD-1 <sup>+</sup> effector memory CD4 T cells | CD45 <sup>+</sup> CD3 <sup>+</sup> CD4 <sup>+</sup> CD44 <sup>+</sup> CD62L <sup>-</sup> CD127 <sup>+</sup> PD-1 <sup>+</sup> | 8±3                  | 9±2        | 6±3        | 23.23±9.00%  | 9.49±1.77%*       | 4.91±1.74%  |
| PD-1 <sup>+</sup> effector memory CD8 T cells | CD45 <sup>+</sup> CD3 <sup>+</sup> CD8 <sup>+</sup> CD44 <sup>+</sup> CD62L <sup>-</sup> CD127 <sup>+</sup> PD-1 <sup>+</sup> | 3±1                  | 10±3       | 10±5       | 14.05±3.11%  | 12.80±2.37%       | 19.55±5.34% |

*Note:* % of T cells, CD4 T cells, and CD8 T cells were calculated in total leukocytes (CD45<sup>+</sup>) and T cells (CD45<sup>+</sup>CD3<sup>+</sup>), respectively. % of other T cell subsets were calculated in total CD4 and CD8 T cells, respectively. % of PD-1<sup>+</sup> T cell subsets were calculated in total corresponding T cell subsets as indicated, respectively. The data were expressed as mean ± SEM (n = 6-10/group). \* indicates the statistically significant difference between Orx and Sham; # indicates the statistically significant difference between Orx and Orx+DHT.



**Supplemental Table 6. A complete list of T cell subsets analyzed by flow cytometry in the spleen in sham-operated and orchietomized (Orx) mice administered Aldo-salt with and without dihydrotestosterone (DHT)**

| Subsets                                       | CD markers                                                                                                                    | # of T cells / spleen |                       |                   | % of T cells |              |             |
|-----------------------------------------------|-------------------------------------------------------------------------------------------------------------------------------|-----------------------|-----------------------|-------------------|--------------|--------------|-------------|
|                                               |                                                                                                                               | Sham                  | Orx                   | Orx+DHT           | Sham         | Orx          | Orx+DHT     |
| T cells                                       | CD45 <sup>+</sup> CD3 <sup>+</sup>                                                                                            | 6,281,657±592,168     | 8,973,344±693,080*    | 8,767,771±835,538 | 26.04±1.65%  | 24.74±1.40%  | 25.13±0.74% |
| CD4 T cells                                   | CD45 <sup>+</sup> CD3 <sup>+</sup> CD4 <sup>+</sup>                                                                           | 3,107,685±279,592     | 4,727,726±375,913*    | 4,473,675±424,215 | 49.69±0.82%  | 52.74±0.79%* | 51.04±0.53% |
| CD8 T cells                                   | CD45 <sup>+</sup> CD3 <sup>+</sup> CD8 <sup>+</sup>                                                                           | 2,557,869±281,336     | 3,290,791±285,030     | 3,488,653±351,655 | 40.26±1.09%  | 36.42±0.84%* | 39.73±0.82% |
| Naïve CD4 T cells                             | CD45 <sup>+</sup> CD3 <sup>+</sup> CD4 <sup>+</sup> CD44 <sup>+</sup> CD62L <sup>+</sup>                                      | 1,747,585±258,488     | 2,678,433±349,451     | 2,856,478±298,692 | 54.21±4.08%  | 55.01±2.80%  | 63.84±2.49% |
| Naïve CD8 T cells                             | CD45 <sup>+</sup> CD3 <sup>+</sup> CD8 <sup>+</sup> CD44 <sup>+</sup> CD62L <sup>+</sup>                                      | 1,600,050±215,032     | 2,062,969±235,527     | 2,320,566±295,875 | 61.20±2.95%  | 61.63±1.98%  | 65.59±2.85% |
| Central memory CD4 T cells                    | CD45 <sup>+</sup> CD3 <sup>+</sup> CD4 <sup>+</sup> CD44 <sup>+</sup> CD62L <sup>+</sup>                                      | 214,107±18,989        | 368,163±23,427**      | 286,068±40,509    | 7.13±0.67%   | 7.99±0.56%   | 6.22±0.60%  |
| Central memory CD8 T cells                    | CD45 <sup>+</sup> CD3 <sup>+</sup> CD8 <sup>+</sup> CD44 <sup>+</sup> CD62L <sup>+</sup>                                      | 702,849±71,070        | 838,956±47,693        | 826,982±82,651    | 28.73±2.73%  | 26.37±1.56%  | 24.17±2.22% |
| Effector CD4 T cells                          | CD45 <sup>+</sup> CD3 <sup>+</sup> CD4 <sup>+</sup> CD44 <sup>+</sup> CD62L <sup>+</sup> CD127 <sup>-</sup>                   | 471,853±41,692        | 786,737±41,703***. ## | 543,635±73,548    | 16.25±2.18%  | 17.67±1.82%  | 12.09±1.09% |
| Effector CD8 T cells                          | CD45 <sup>+</sup> CD3 <sup>+</sup> CD8 <sup>+</sup> CD44 <sup>+</sup> CD62L <sup>+</sup> CD127 <sup>-</sup>                   | 83,802±7,404          | 143,744±14,892**      | 112,505±15,606    | 3.43±0.27%   | 4.50±0.39%#  | 3.21±0.30%  |
| Effector memory CD4 T cells                   | CD45 <sup>+</sup> CD3 <sup>+</sup> CD4 <sup>+</sup> CD44 <sup>+</sup> CD62L <sup>+</sup> CD127 <sup>-</sup>                   | 319,502±30,085        | 474,058±36,190*       | 37,353±61,183     | 10.70±1.09%  | 10.27±0.81%  | 8.28±1.25%  |
| Effector memory CD8 T cells                   | CD45 <sup>+</sup> CD3 <sup>+</sup> CD8 <sup>+</sup> CD44 <sup>+</sup> CD62L <sup>+</sup> CD127 <sup>-</sup>                   | 89,860±15,235         | 131,115±17,435        | 107,564±13,502    | 3.52±0.45%   | 3.99±0.44%   | 3.31±0.61%  |
| PD-1 <sup>+</sup> CD4 T cells                 | CD45 <sup>+</sup> CD3 <sup>+</sup> CD4 <sup>+</sup> PD-1 <sup>+</sup>                                                         | 732,907±65,432        | 1,197,386±82,167**    | 873,180±159,323   | 24.76±2.78%  | 25.86±1.68%  | 19.13±3.11% |
| PD-1 <sup>+</sup> CD8 T cells                 | CD45 <sup>+</sup> CD3 <sup>+</sup> CD8 <sup>+</sup> PD-1 <sup>+</sup>                                                         | 119,045±15,451        | 178,680±22,632        | 177,581±35,976    | 4.65±0.27%   | 5.43±0.61%   | 5.23±1.09%  |
| PD-1 <sup>+</sup> naïve CD4 T cells           | CD45 <sup>+</sup> CD3 <sup>+</sup> CD4 <sup>+</sup> CD44 <sup>+</sup> CD62L <sup>+</sup> PD-1 <sup>+</sup>                    | 51,792±4,758          | 95,330±18,486*        | 75,078±10,528     | 3.48±0.66%   | 3.54±0.32%   | 2.62±0.22%  |
| PD-1 <sup>+</sup> naïve CD8 T cells           | CD45 <sup>+</sup> CD3 <sup>+</sup> CD8 <sup>+</sup> CD44 <sup>+</sup> CD62L <sup>+</sup> PD-1 <sup>+</sup>                    | 15,425±1,577          | 27,326±2,040**        | 24,588±3,484      | 1.08±0.14%   | 1.42±0.13%   | 1.07±0.07%  |
| PD-1 <sup>+</sup> central memory CD4 T cells  | CD45 <sup>+</sup> CD3 <sup>+</sup> CD4 <sup>+</sup> CD44 <sup>+</sup> CD62L <sup>+</sup> PD-1 <sup>+</sup>                    | 67,471±8,893          | 121,917±7,785**       | 91,375±17,072     | 31.18±2.74%  | 33.12±0.81%  | 30.44±2.23% |
| PD-1 <sup>+</sup> central memory CD8 T cells  | CD45 <sup>+</sup> CD3 <sup>+</sup> CD8 <sup>+</sup> CD44 <sup>+</sup> CD62L <sup>+</sup> PD-1 <sup>+</sup>                    | 13,811±2,072          | 17,439±1,847          | 15,041±2,409      | 1.97±0.24%   | 2.07±0.17%   | 1.77±0.16%  |
| PD-1 <sup>+</sup> effector CD4 T cells        | CD45 <sup>+</sup> CD3 <sup>+</sup> CD4 <sup>+</sup> CD44 <sup>+</sup> CD62L <sup>+</sup> CD127 <sup>-</sup> PD-1 <sup>+</sup> | 224,723±22,003        | 347,489±21,041*. #    | 242,495±40,599    | 47.49±2.42%  | 44.07±0.87%  | 43.61±2.46% |
| PD-1 <sup>+</sup> effector CD8 T cells        | CD45 <sup>+</sup> CD3 <sup>+</sup> CD8 <sup>+</sup> CD44 <sup>+</sup> CD62L <sup>+</sup> CD127 <sup>-</sup> PD-1 <sup>+</sup> | 26,300±2,874          | 42,390±5,493          | 41,028±9,156      | 31.86±3.28%  | 29.57±2.83%  | 35.73±6.08% |
| PD-1 <sup>+</sup> effector memory CD4 T cells | CD45 <sup>+</sup> CD3 <sup>+</sup> CD4 <sup>+</sup> CD44 <sup>+</sup> CD62L <sup>+</sup> CD127 <sup>-</sup> PD-1 <sup>+</sup> | 68,882±11,774         | 76,937±11,718         | 82,860±22,206     | 20.98±1.71%  | 15.82±1.47%  | 19.83±2.50% |
| PD-1 <sup>+</sup> effector memory CD8 T cells | CD45 <sup>+</sup> CD3 <sup>+</sup> CD8 <sup>+</sup> CD44 <sup>+</sup> CD62L <sup>+</sup> CD127 <sup>-</sup> PD-1 <sup>+</sup> | 10,537±1,465          | 14,155±2,333          | 17,336±3,563      | 12.47±1.34%  | 10.52±0.83%# | 16.37±2.34% |

*Note:* % of T cells, CD4 T cells, and CD8 T cells were calculated in total leukocytes (CD45<sup>+</sup>) and T cells (CD45<sup>+</sup>CD3<sup>+</sup>), respectively. % of other T cell subsets were calculated in total CD4 and CD8 T cells, respectively. % of PD-1<sup>+</sup> T cell subsets were calculated in total corresponding T cell subsets as indicated, respectively. The data were expressed as mean ± SEM (n = 7-9/group). \* indicates the statistically significant difference between Orx and Sham; # indicates the statistically significant difference between Orx and Orx+DHT.

## Supplemental Table 7. A complete list of antibodies used in the current study

| Antibody | Application | Source/<br>Reactivity | Manufacture    | Catalog     | Dilution/amount                | Fluorophore      | Reference                                                       |
|----------|-------------|-----------------------|----------------|-------------|--------------------------------|------------------|-----------------------------------------------------------------|
| AR       | IHC         | Rabbit anti-mouse     | Abcam          | Ab74272     | 1:300                          |                  | Dufour et al., Cell Reports. 2022;38, 110534                    |
| AR       | WB          | Rabbit anti-human     | Cell Signaling | 5153        | 1:2000                         |                  | Li et al. Maturitas.2009; 63, 142-148.                          |
| IL-6     | IHC         | Rabbit anti-mouse     | Bioss          | Bs-0782R    | 1:2000                         |                  | Sun et al., Biomed Res Int. 2015;919401                         |
| MR       | IHC         | Mouse anti-mouse      | DSHB           | rMR1-18 1D5 | 1.1 µg/ml                      |                  | Prager et al., PLoS One. 2010;5(12):e14344                      |
| p-STAT3  | IHC         | Rabbit anti-mouse     | Cell Signaling | 9145        | 1:400                          |                  | Cheng et al., Nat Commun. 2022;29;13(1):4418                    |
| F4/80    | IHC         | Rabbit anti-mouse     | Cell Signaling | 70076       | 1:1000                         |                  | Wang et al., Front Immunol. 2022;13:901209                      |
| Ly6G     | IHC         | Rat anti-mouse        | BD Pharmingen  | 551459      | 1:1500                         |                  | Fleming, et. al. J Immunol. 1993; 151(5):2399-2408              |
| PD-1     | WB, IHC     | Rabbit anti-mouse     | Cell Signaling | 84651       | WB 1:1000<br>IHC 1:250         |                  | Yuan et al., JCI insight. 2022;7(11):e157788.                   |
| PD-1     | IHC         | Rabbit anti-human     | Cell Signaling | 86163       | IHC 1:250                      |                  | Ju et al., Nat Commun. 2022; 13(1):5378                         |
| CD3e     | WB, IHC     | Rabbit anti-mouse     | Cell Signaling | 99940       | WB 1:1000<br>IHC 1:500         |                  | Wallace-Povirk et al., Sci Rep. 2022;5;12(1):11346              |
| CD19     | WB, IHC     | Rabbit anti-mouse     | Cell Signaling | 90176       | WB 1:1000<br>IHC 1:2000        |                  | Tedder et al. Immunity. 1997;6, 107-18.                         |
| GAPDH    | WB          | Rabbit anti-mouse     | Cell Signaling | 2118        | 1:5000                         |                  | Wong et al., J Clin Invest. 2022;132(15):e152635                |
| AR       | ChIP        | Mouse anti-mouse      | Santa Cruz     | sc7305      | 5 µg/ChIP                      |                  | Sharma et al., Front Oncol. 2022;12: 824594                     |
| AR       | ChIP        | Rabbit anti-mouse     | Millipore      | 17-10489    | 1 µg/ChIP                      |                  | Nigro et al., Diabetes. 2021;70(6):1250–1264                    |
| CD45     | FCM         | Rat anti-mouse        | Biolegend      | 103128      | 0.25 µg/10 <sup>6</sup> cells  | Alexa Fluor 700  | Tian et al., Nat Commun. 2016;7:13283.                          |
| CD45     | FCM         | Rat anti-mouse        | Biolegend      | 103126      | 0.25 µg/10 <sup>6</sup> cells  | Pacific blue     | Pattabiraman et al., Science. 2016;351(6277):aad3680            |
| CD45     | FCM         | Rat anti-mouse        | Biolegend      | 103131      | 0.25 µg/10 <sup>6</sup> cells  | PerCP/Cyanine5.5 | Radtke AJ, et al. 2020. Proc Natl Acad Sci U S A. 117:33455-65. |
| CD3ε     | FCM         | Rat anti-mouse        | Biolegend      | 100320      | 0.5 µg/10 <sup>6</sup> cells   | PE/Cy7           | Cabañero et al. Elife. 2020;9:e55582                            |
| CD3      | FCM         | Rat anti-mouse        | Biolegend      | 100240      | 0.25 µg/10 <sup>6</sup> cells  | Alexa Fluor 594  | Lederer et al., Immunity. 2020;53(6):1281-1295.e5.              |
| CD4      | FCM         | Rat anti-mouse        | BD Horizon     | 563790      | 0.25 µg/10 <sup>6</sup> cells  | BUV395           | Wineman JP et al. Blood. 1992; 180(7):1717-1724.                |
| CD8a     | FCM         | Rat anti-mouse        | Biolegend      | 100793      | 0.25 µg/10 <sup>6</sup> cells  | Spark Blue 574   | Radtke AJ, et al. 2022. Nat Protoc. 17:378-401.                 |
| CD44     | FCM         | Rat anti-mouse        | Biolegend      | 103028      | 1 µg/10 <sup>6</sup> cells     | APC/Cyanine7     | Tay S, et al. 2014. Proc Natl Acad Sci U S A. 111:2540.         |
| CD62L    | FCM         | Rat anti-mouse        | Biolegend      | 104436      | 0.125 µg/10 <sup>6</sup> cells | BV421            | Bergot AS, et al. 2020. J Immunol. 204:1787.                    |
| CD127    | FCM         | Rat anti-mouse        | Biolegend      | 135018      | 2 µg/10 <sup>6</sup> cells     | Alexa Fluor 488  | Yamaguchi A, et al. 2021. Genes Cells. 26:782.                  |
| PD-1     | FCM         | Rat anti-mouse        | Biolegend      | 135210      | 0.25 µg/10 <sup>6</sup> cells  | APC              | Mandal et al. Cell Reports. 2021;35(6):109094.                  |
| PD-1     | FCM         | Rat anti-mouse        | Biolegend      | 135219      | 0.125 µg/10 <sup>6</sup> cells | BV605            | Mogilenko et al., Immunity 2021;54(1):99-115.e12                |
| CD19     | FCM         | Rat anti-mouse        | Biolegend      | 115534      | 0.25 µg/10 <sup>6</sup> cells  | PerCP            | Faust et al., J Clin Invest. 2020;130(10):5493-5507             |
| Ly6G     | FCM         | Rat anti-mouse        | Biolegend      | 127608      | 0.25 µg/10 <sup>6</sup> cells  | PE               | Okada et al., J Biol Chem. 2014;289(47):32926-36                |
| F4/80    | FCM         | Rat anti-mouse        | Biolegend      | 123120      | 1 µg/10 <sup>6</sup> cells     | Alexa Fluor 488  | Wheeler et al., Nat Commun. 2015;6: 8964.                       |
| F4/80    | FCM         | Rat anti-mouse        | Biolegend      | 123110      | 1 µg/10 <sup>6</sup> cells     | PE               | Xiang et al., PNAS 2014;111(48):E5159-68                        |

Note: IHC, immunocytochemistry. WB, western blot. ChIP, Chromatin immunoprecipitation. FCM, flow cytometry.

**Supplemental Table 8. A complete list of mouse PCR primers used in the current study**

| Gene    | Primer         | Sequence                        | Application   |
|---------|----------------|---------------------------------|---------------|
| Ar      | Forward        | 5'-GGACCATGTTTTACCCATCG-3'      | Real-time PCR |
|         | Reverse        | 5'-TCGTTTCTGCTGGCACATAG-3'      |               |
| Bmal1   | Forward        | 5'-ATCAGCGACTTCATGTCTCC-3'      | Real-time PCR |
|         | Reverse        | 5'-CTCCCTTGCACTTCTTGATCC-3'     |               |
| 36B4    | Forward        | 5'-CCCTGAAGTGCTCGACATCA-3'      | Real-time PCR |
|         | Reverse        | 5'-TGCGGACACCCTCCAGAA-3'        |               |
| Ccl2    | Forward        | 5'-CTTCTCCACCACCATGCA-3'        | Real-time PCR |
|         | Reverse        | 5'-CCAGCCGGCAACTGTGA-3'         |               |
| Ccl4    | Forward        | 5'-TTCCTGCTGTTTCTCTTACACCT-3'   | Real-time PCR |
|         | Reverse        | 5'-CTGTCTGCCTCTTTTGGTCAG-3'     |               |
| Cyp17a1 | Forward        | 5'-AGTGCTCGTGAAGAAGGGGA-3'      | Real-time PCR |
|         | Reverse        | 5'-TTTCCTTGGTCCGACAAGAGG-3'     |               |
| Hsd17b3 | Forward        | 5'-AGGTTCTCGCAGCACCTTTT-3'      | Real-time PCR |
|         | Reverse        | 5'-CATCGCCTGCTCCGGTAATC-3'      |               |
| Hsd3b2  | Forward        | 5'-GGTTTTTGGGGCAGAGGATCA-3'     | Real-time PCR |
|         | Reverse        | 5'-GGTACTGGGTGTCAAGAATGTCT-3'   |               |
| Il1b    | Forward        | 5'-TCGCTCAGGGTCACAAGAAA-3'      | Real-time PCR |
|         | Reverse        | 5'-CATCAGAGGCAAGGAGGAAAAC-3'    |               |
| Il6     | Forward        | 5'-ACAAGTCGGAGGCTTAATTACACAT-3' | Real-time PCR |
|         | Reverse        | 5'-TTGCCATTGCACAACCTCTTTTC-3'   |               |
| Il6ra   | Forward        | 5'-AGCGACACTGGGGACTATTTA-3'     | Real-time PCR |
|         | Reverse        | 5'-ACAGCCTTCGTGGTTGGAG-3'       |               |
| Il6st   | Forward        | 5'-TGGAGTGAGGAGGCTAGTGG-3'      | Real-time PCR |
|         | Reverse        | 5'-ATTTTCCCATTGGCTTCAGA-3'      |               |
| Mmp2    | Forward        | 5'-GGACAAGTGGTCCGCGTAAA-3'      | Real-time PCR |
|         | Reverse        | 5'-CCGACCGTTGAACAGGAAGG-3'      |               |
| Nr3c2   | Forward        | 5'-ATGGGTACCCGGTCTAGAG-3'       | Real-time PCR |
|         | Reverse        | 5'-ACCAAGCAGATCTTGGAAAGG-3'     |               |
| Pdcd1   | Forward        | 5'-CACTATCCCCTGACCCTTCA-3'      | Genotyping    |
|         | WT reverse     | 5'-AGAAGGTGAGGGACCTCCAG-3'      |               |
|         | Mutant reverse | 5'-CACAGGGTAGGCATGTAGCA-3'      |               |
| Pdcd1   | Forward        | 5'-CCTTTAGCTTCTGGGAAATGTTT-3'   | ChIP Exon 4   |
|         | Reverse        | 5'-CCCTGGAGGTAATGGCAAGTTTCC-3'  |               |
| Pdcd1   | Forward        | 5'-TCATTCCACTACAAGTCAATCAA-3'   | ChIP Exon 6   |
|         | Reverse        | 5'-TCTTCCCTTCTCATCTCATTGTGA-3'  |               |
| Pdcd1   | Forward        | 5'-ACCCTGGTCATTCACTTGGG-3'      | Real-time PCR |
|         | Reverse        | 5'-CATTTGCTCCCTCTGACACTG-3'     |               |
| Scnn1a  | Forward        | 5'-TACTTCAGCTACCCGTGAGT-3'      | Real-time PCR |
|         | Reverse        | 5'-AAAAAGCGTCTGTTCCGTGAT-3'     |               |
| Scnn1b  | Forward        | 5'-ACCCGGTGGTTCTCAATTTGT-3'     | Real-time PCR |
|         | Reverse        | 5'-AAGTTCCGCAAGGTACACACA-3'     |               |
| Scnn1g  | Forward        | 5'-GGCACCGACCATTAAGGACC-3'      | Real-time PCR |
|         | Reverse        | 5'-CTGTCAGCGTGAACGCAATC-3'      |               |
| Sgk1    | Forward        | 5'-TCAGAGCGGAATGTTCTGTTG-3'     | Real-time PCR |
|         | Reverse        | 5'-AGCGGTCTGGAATGAGAAGTG-3'     |               |
| Tgfb2   | Forward        | 5'-CCATCCC GCCACTTTCTAC-3'      | Real-time PCR |
|         | Reverse        | 5'-TCTGGTTTT CACAACCTTGCT-3'    |               |
| Tnf     | Forward        | 5'-CCCTCACACTCAGATCATCTTCT-3'   | Real-time PCR |
|         | Reverse        | 5'-GCTACGACGTGGGCTACAG-3'       |               |
